# 1 Heteromeric RNP assembly at LINEs controls lineage-specific

## 2 RNA processing

3 Jan Attig<sup>1,2,\*,#</sup>, Federico Agostini<sup>1,#</sup>, Clare Gooding<sup>3</sup>, Aarti Singh<sup>2,4</sup>, Anob M  
4 Chakrabarti<sup>1,5</sup>, Nejc Haberman<sup>1,2</sup>, Warren Emmett<sup>1,2,5</sup>, Christopher WJ Smith<sup>3</sup>,  
5 Nicholas M Luscombe<sup>1,5,6</sup> and Jernej Ule<sup>1,2\*</sup>

6

7 <sup>1</sup> The Francis Crick Institute, Midland Road 1, Kings Cross, London NW1 1AT

8 <sup>2</sup> Department of Molecular Neuroscience, UCL Institute of Neurology, Queen  
9 Square, London, WC1N 3BG, UK

10 <sup>3</sup> Department of Biochemistry, University of Cambridge, Tennis Court Road,  
11 Cambridge, CB2 1QW, UK

12 <sup>4</sup> Department of Comparative Biomedical Sciences, The Royal Veterinary  
13 College, Royal College Street, London NW1 0TU, UK

14 <sup>5</sup> Department of Genetics, Environment and Evolution, UCL Genetics Institute,  
15 Gower Street, London WC1E 6BT, UK

16 <sup>6</sup> Okinawa Institute of Science & Technology Graduate University, 1919-1  
17 Tancha, Onna-son, Kunigami-gun, Okinawa 904-0495, Japan

18 # These authors contributed equally to this work.

19

20 \*Correspondence: [jan.attig@crick.ac.uk](mailto:jan.attig@crick.ac.uk); [jernej.ule@crick.ac.uk](mailto:jernej.ule@crick.ac.uk)

21

22 *Lead author:* Jernej Ule

23

24 Keywords: splicing, pre-mRNA processing, LINE repeats, MATR3, PTBP1

27 **ABSTRACT**

28 It is challenging for RNA processing machineries to select exons within long  
29 intronic regions. We find that intronic LINE repeat sequences (LINEs)  
30 contribute to this selection by recruiting dozens of RNA-binding proteins  
31 (RBPs). This includes MATR3, which promotes binding of PTBP1 to  
32 multivalent binding sites in LINEs. Both RBPs repress splicing and 3' end  
33 processing within and around LINEs, as demonstrated in cultured human  
34 cells and mouse brain. Notably, repressive RBPs preferentially bind to  
35 evolutionarily young LINEs, which are confined to deep intronic regions.  
36 These RBPs insulate both LINEs and surrounding regions from RNA  
37 processing. Upon evolutionary divergence, gradual loss of insulation  
38 diversifies the roles of LINEs. Older LINEs are located closer to exons, are a  
39 common source of tissue-specific exons, and increasingly bind to RBPs that  
40 enhance RNA processing. Thus, LINEs are hubs for assembly of repressive  
41 RBPs, and contribute to evolution of new, lineage-specific transcripts in  
42 mammals.

43

## 44 INTRODUCTION

45 Human introns are replete with sequences that resemble splice sites and  
46 polyA sites, creating a demand for mechanisms that can help processing  
47 machineries distinguish true from cryptic RNA processing sites (Semlow and  
48 Staley, 2012, Sibley et al., 2016). Inappropriate recognition of such sites  
49 initiates inclusion of cryptic exons, which can disrupt gene expressing by  
50 changing the reading frame, introducing premature stop codons, and  
51 decreasing transcript stability. Mutations that activate splicing of cryptic exons  
52 therefore cause a number of hereditary human diseases (Vorechovsky, 2010,  
53 Sibley et al., 2016). It is well understood that exon definition mechanisms  
54 maintain splicing fidelity by combinatorial recognition of 3' and 5' splice sites  
55 and exonic enhancer sequences. Moreover, RNA-binding proteins (RBPs)  
56 can contribute to splicing fidelity by directly repressing the cryptic splice sites  
57 of RNA processing (Reed, 2000). Therefore, mutations disrupting their binding  
58 sites can activate cryptic exons and cause disease (Eom et al., 2013,  
59 Vorechovsky, 2010). However, the RBPs that promote splicing fidelity by  
60 assembling over deep intronic regions, and the elements that coordinate  
61 assembly of ribonucleoprotein complexes (RNPs) across introns are yet to be  
62 fully identified.

63 The human genome contains over 1.5 million LINE repeats, retrotransposons,  
64 many of which are located in introns. The two most common LINE repeat  
65 families in mammals are L1 and L2, which first inserted before the split of  
66 monotremata and therians approximately 200 million years ago (O'Leary et  
67 al., 2013), and new subfamilies have amplified in bursts ever since (Huang et  
68 al., 2010). The consensus L1 sequence contains strong cryptic splice sites in  
69 both sense and antisense orientation (Belancio et al., 2006, Merkin et al.,  
70 2015). The effect of intragenic LINEs on splicing has been studied mainly in  
71 the context of pathological conditions, in which intronic LINE insertions disrupt  
72 expression of their host gene. For instance, creation of new cryptic LINE-  
73 derived exons disrupt expression of the *CYBB* gene in individuals with chronic  
74 granulomatous disease (Meischl et al., 2000) and the *DMD* gene in X-linked  
75 dilated cardiomyopathy (Yoshida et al., 1998), and a less well characterised

76 intronic LINE insertion disrupts expression of *XRP2* in X-linked retinitis  
77 pigmentosa 2 (Schwahn et al., 1998). Yet, only 60-80 LINEs were found  
78 capable of retrotransposition in the human genome, and account for all the *de*  
79 *novo* LINE insertions observed in human populations or *in vitro* (Beck et al.,  
80 2010, Brouha et al., 2003). In the remaining LINEs, mutations have disrupted  
81 the ability to retrotranspose, and most are degenerated and truncated  
82 compared to the consensus sequence. In many genes, such degenerated  
83 LINEs form part of their introns. Several RBPs are known to bind active LINEs  
84 and thereby interfere with their retrotransposition (Goodier et al., 2013, Taylor  
85 et al., 2013, Goodier et al., 2012), but the RBPs binding intronic LINEs, and  
86 the regulatory potential of these LINEs, are poorly understood.

87 Here, we surveyed iCLIP and eCLIP data to identify 28 RBPs that have  
88 enriched binding to intragenic LINEs. Notably many of these RBPs, including  
89 MATR3 and PTBP1, primarily bind to deep intronic regions i.e. more than  
90 >500nt away from any known exon. MATR3 promotes binding of PTBP1 to  
91 LINEs at clusters rich in CU-binding motifs and, together, the two RBPs create  
92 a repressive environment by blocking the recognition of cryptic polyA-sites  
93 and splice sites. Analysis of distinct evolutionary classes of intragenic LINEs  
94 demonstrated that repressive RBPs are most enriched on younger, primate-  
95 specific L1 elements, which are depleted in the vicinity of exons. In contrast,  
96 the binding of repressive RBPs is decreased on evolutionary older LINEs,  
97 especially those preserved across mammals, with a concomitant increase in  
98 binding of RBPs that are involved in recognition of 3' and 5' splice sites, and  
99 polyA sites. These older LINEs are located in closer proximity to exons, and  
100 are a source of new mammalian exons, with higher inclusion levels and  
101 differential regulation across human tissues. Thus, while most LINEs recruit  
102 repressive RBPs to insulate the deep intronic regions from RNA processing,  
103 many older LINEs have started to escape from this repression. Hence, LINEs  
104 facilitate evolutionary innovations in the emergence of mammal-specific  
105 transcripts.

106

107

## 108 **RESULTS**

### 109 **LINE-derived sequences recruit dozens of RBPs to deep intronic** 110 **regions.**

111 The primary goal of our study was to identify repressive RBPs that assemble  
112 over deep intronic regions in a coordinated manner to distinguish genuine  
113 exons from other exon-like sequences that are present within introns.  
114 Because many cryptic exons arise from retrotransposable elements, which  
115 are pervasive in introns (Smit et al., 1996-2010a, Deininger and Batzer,  
116 2002), we hypothesised that retrotransposons might be RNP assembly points  
117 in deep intronic regions. We focused on LINEs, because they constitute the  
118 largest proportion of intronic sequence, and are generally excluded from  
119 mRNAs but not pre-mRNA, as is evident from their presence in nuclear but  
120 not cytoplasmic transcriptomes in HeLa, K562 and HepG2 cell lines, and from  
121 their depletion in nuclear polyA<sup>+</sup> compared to polyA<sup>-</sup> RNA (Figure 1A). To  
122 identify RBPs that bind to L1-derived sequences, we examined iCLIP data for  
123 17 RBPs published by our laboratory, and eCLIP data from K562 and HepG2  
124 cells for 112 RBPs available from ENCODE (Sloan et al., 2016, Van Nostrand  
125 et al., 2017). We ranked these RBPs by the proportion of crosslink events  
126 mapping to sense or antisense L1 elements (Figure 1B), as well as by their  
127 propensity to bind to deep intronic regions (Figure 1C). Overall, find that RBPs  
128 with most enrichment on L1 elements also rank highly for deep intronic  
129 binding.

130 While many RBPs show binding in deep intronic regions, MATR3 and PTBP1  
131 ranked highest in iCLIP data (Figure 1C). Both RBPs have strong enrichment  
132 on L1s: 19% of MATR3 and PTBP1 iCLIP crosslink events were in antisense  
133 L1 repeats, which is a strong overrepresentation compared to the median of  
134 6.4% across all examined iCLIP data (Figure 1B and SupplTable1). This  
135 agrees with a previous study that also found enrichment of PTBP1 iCLIP  
136 reads in LINEs compared to a genomic null model (Kelley et al., 2014). In  
137 eCLIP data (for is lacking for MATR3), ~10% of PTBP1 crosslink events  
138 mapped to antisense L1 elements, compared with ~4% across all RBPs  
139 examined. The decreased enrichment in eCLIP compared to iCLIP likely

140 stems from differences in data processing (see Methods for comment).

141 Within our set of iCLIP data, we also found CELF2, ELAVL1 and TARDBP  
142 overrepresented at antisense L1s. Nine additional RBPs showed enrichment  
143 on L1 elements in eCLIP data: SUGP2, hnRNPM, KHSRP, hnRNPC, FUBP3  
144 and SFPQ on antisense L1 repeats, and HLTf, KHDRBS1 and SAFB2 on L1  
145 elements in sense. We also examined RBP binding to L2 elements, which are  
146 about three times less common in human genome than L1s. Correspondingly,  
147 we found that L2s accounted for a smaller proportion of RBP binding sites  
148 than L1s. SUGP2, MATR3, PTBP1 and HNRNPK had strongest enrichment in  
149 sense L2s, and HNRNPA1, TAF15, HNRNPU and SAFB2 in antisense L2s  
150 (Suppl. Table 2).

151 In our analysis we used reads mapping uniquely to the genome, which could  
152 miss the reads mapping to highly repetitive sequences. To account for them,  
153 we also examined eCLIP RBP binding to different sub-families of LINEs by  
154 using the Tetranscripts method (Jin et al., 2015). Median enrichment of LINE  
155 subfamilies recapitulated our ranking, with equal enrichment for all of the  
156 subfamilies for most of the RBPs and with strongest variation between  
157 families seen for HNRNPM and SFPQ (Figure S1A). In total, Tetranscript  
158 identified >2-fold enrichment on L1 or L2s for 25 RBPs in the eCLIP data. In  
159 conclusion, we find strong enrichment of MATR3 and PTBP1 binding on L1  
160 and L2 elements, which appears to be related to their deep intronic binding  
161 profiles.

162

### 163 **MATR3 stabilises PTBP1-RNA interactions to promote L1 binding.**

164 MATR3 and PTBP1 directly interact (Coelho et al., 2015), but it is not known if  
165 this affects their endogenous RNA binding. Given that both proteins are  
166 enriched on antisense L1s, we wished to understand if their binding sites  
167 overlap. Since MATR3 eCLIP data are not yet available, we focused solely on  
168 iCLIP analysis. We analysed the five RBPs with most LINE binding in iCLIP  
169 and performed unsupervised clustering on the 50 most strongly bound LINEs  
170 of each RBP. The strongest correlation on individual LINEs was observed

171 between MATR3 and PTBP1 (pearson coefficient = 0.83), with less overlap  
172 shared with CELF2, essentially no overlap with TARDBP-bound elements,  
173 and a slight anti-correlation with ELAVL1 occupied loci (Figure S2A).  
174 Conversely, MATR3 binding was enriched in proximity of PTBP1 binding  
175 peaks and this enrichment is significantly stronger at peaks located within  
176 rather than outside of LINEs (p-value < 2.2e-16, Figure S2B). Hence, LINEs  
177 appear to act as a platform for simultaneous binding of MATR3 and PTBP1.

178 Next, we examined if MATR3 and PTBP1 affect each other in their binding to  
179 LINEs. We performed iCLIP with PTBP1 in HEK293 cells depleted of MATR3,  
180 and iCLIP with MATR3 in HEK293 cells depleted of PTBP1 and PTBP2, and  
181 in both cases performed control iCLIP from cells transfected with control  
182 siRNA (Figure 2A and Figure S2C-D). Efficient siRNA-depletion of MATR3  
183 and PTBP1 was validated by Western blot (Figure 2A and Figure S3D).  
184 Notably, the amount of RNA crosslinked to PTBP1 was visibly decreased  
185 upon MATR3 depletion, as measured by <sup>32</sup>P labelling of immunoprecipiated  
186 RNA (Figure 2A; replicates in Figure S2C). This decrease was not a result of  
187 decreased abundance of PTBP1 (Figure 2A). We did not observe any  
188 decrease in MATR3 crosslinked RNA upon depletion of PTBP1/PTBP2  
189 (Figure S2D). This indicates that MATR3 is required for efficient crosslinking  
190 of PTBP1 to endogenous transcripts, but not vice versa.

191 To analyse changes in PTBP1 binding upon MATR3 depletion, we identified  
192 peaks of PTBP1 crosslinking, focused on those with sufficient coverage, and  
193 classified them based on the change in normalised counts between  
194 MATR3-depleted sample and control into MATR3-dependent,  
195 MATR3-independent and remaining peaks (Figure 2B). MATR3-dependent  
196 PTBP1 peaks were shorter than MATR3-independent ones, and had more  
197 MATR3 binding in their vicinity (Figure 2C and D). As expected, PTBP1  
198 binding peaks were highly enriched for CT-tetramers, which is most prominent  
199 within the peak, but is also seen over a 200nt region around the peak (Figure  
200 2E). Intriguingly, we found that the enrichment over this 200nt region is  
201 stronger at the MATR3-dependent PTBP1 peaks compared to the remaining  
202 peaks (Figure 2E). Thus, the MATR3-dependent PTBP1 binding peaks are

203 shorter but are composed of the highest density of binding motifs over a 200nt  
204 region. This indicates that MATR3 supports the interactions between PTBP1  
205 and multivalent RNA binding sites, i.e., those that contain multiple repeats of  
206 high-affinity PTBP1 binding motifs

207 Next, we examined enrichment of different categories of peaks within  
208 repetitive elements. Importantly, MATR3-dependent PTBP1 binding peaks  
209 were most enriched within an antisense L1 elements compared to the  
210 remaining peaks (Figure 2F). PTBP1 also binds CT- and T-rich microsatellite  
211 repeats (Ling et al., 2016), but this accounts for only ~0.2% of all binding  
212 peaks in unperturbed HEK293 cells. While no L1 enrichment is seen for  
213 MATR3-independent PTBP1 peaks, they more frequently overlap with the  
214 microsatellite repeats. In the reciprocal analysis of MATR3 iCLIP after PTBP1  
215 depletion (Figure S2D-F), we found that PTBP1 is not required for MATR3  
216 binding to LINE repeats, indicating that MATR3 is recruited to LINEs either  
217 through its own specificity, or through interactions with additional RBPs.

218 Our analysis suggested that *in vivo* binding of PTBP1 to L1 repeats is  
219 stabilised by MATR3. To confirm that MATR3 directly aids RNA-binding of  
220 PTBP1, we purified recombinant PTBP1 (rPTBP1) and MATR3 fragments  
221 (rMATR3) that do or do not interact with PTBP1. We previously found a  
222 PTBP1 RRM2 Interacting (PRI) motif N-terminal of the MATR3 RRMs is  
223 essential for interaction with PTBP1 RRM2 (Coelho et al., 2015). We purified  
224 a MATR3 fragment comprising its two RRMs but missing the PRI motif  
225 ('RRMs'), as well as the RRMs with the PRI motif ('PRI-RRMs') and a mutated  
226 sequence with point mutations in the PRI disrupting PTBP1 binding ('mPRI-  
227 RRMs'). We designed an *in vitro* synthesised RNA with two MATR3 RNA  
228 compete motifs (ATCTT, Ray et al., 2013) as well as small CT-stretches,  
229 which could allow multivalent binding of PTBP1 in vicinity. In agreement,  
230 rPTBP1 and all rMATR3 fragments bound to this RNA. We found that the  
231 non-interacting rMATR3 RRMs fragment competes with PTBP1 for RNA  
232 binding at equimolar concentrations (Figure 2G). Unlike the RRM rMATR3  
233 fragment, the PRI-RRM rMATR3 did not block crosslinking of PTBP1 to the  
234 RNA even at excess molarity of rMATR3. The mPRI-RRMs rMATR3 blocked



235 PTBP1 binding, demonstrating the dependency on the interaction motif for  
236 formation of a heteromeric PTBP1\*MATR3 complex on the RNA. As a next  
237 step, we added rMATR3 to HeLa nuclear extracts with endogenous PTBP1,  
238 and assayed binding to two RNA probes. We used the probe with two ATCTT  
239 motifs (as in Figure 2G), and in addition a probe with six CTCTT motifs (the  
240 RNA compete motif for PTBP1), for which we expected stronger binding of  
241 PTBP1. Addition of rMATR3 promoted binding of endogenous PTBP1 to the  
242 exogenous ATCTT<sub>2</sub> RNA through the PRI motif (Figure S2G). On the CTCTT<sub>6</sub>  
243 probe, we observed increased binding of endogenous PTBP1 in absence of  
244 recombinant MATR3 compared to the ATCTT<sub>2</sub> probe, and PTBP1 was  
245 completely displaced by non-interacting rMATR3 RRM<sub>s</sub> but not by the  
246 PRI-RRM rMATR3. Hence, the PRI motif in MATR3 allows formation of a  
247 heteromeric complex on substrate RNAs.

248 Together, we show that PTBP1 and MATR3 *in vivo* overlap at antisense  
249 L1-derived binding sites, which are rich in multiple repeats of high-affinity  
250 PTBP1 binding motifs. We find that the PRI-mediated interaction between  
251 MATR3 and PTBP1 is crucial to promote simultaneous binding of both  
252 proteins to an RNA, and that MATR3 can recruit PTBP1 to RNA in a  
253 sequence-dependent manner *in vitro* and *in vivo*. We conclude MATR3  
254 promotes binding of PTBP1 to multivalent binding sites within antisense L1  
255 repeats.

256

## 257 **MATR3 and PTBP1 co-repress exons and poly(A) sites close to LINE** 258 **repeats**

259 To resolve the role that coordinated LINE binding of MATR3 and PTBP1  
260 might play in RNA-processing, we first re-analysed our previous splice  
261 junction microarray data on repression of alternatively spliced exons by  
262 MATR3 (Coelho et al., 2015). Of the 421 exons that were found to be  
263 repressed by MATR3, 64 contained at least one of their splice sites within a  
264 LINE repeat, and were therefore considered 'LINE-derived exons'; this  
265 represents a 2.3-fold enrichment for LINE-derived exons compared to all

266 exons covered in the array design. For PTBP1, we found 50 significantly  
267 repressed LINE-derived exons. We evaluated the frequency of L1 and L2  
268 repeats in the introns flanking MATR3/PTBP1 repressed exons (Figure 3A,  
269 and Figure S3A), and found ~2-fold enrichment for antisense L1 sequence in  
270 a window of 2kb, even after removing all LINE-derived exons (Figure S3B).  
271 Hence, we found both LINE-derived as well as LINE-proximal exons are  
272 overrepresented among exons repressed by MATR3/PTBP1.

273 Next we generated total RNAseq data of cytoplasmic and nuclear RNA from  
274 HeLa cells depleted of MATR3 with two independent siRNAs, or  
275 PTBP1/PTBP2, or all three factors simultaneously (Figure S3C and Suppl.  
276 Table 3). We detected 1,430 LINE-derived exons, each supported by at least  
277 one splice-junction read mapping to a LINE element; 1,114 within  
278 protein-coding genes and the remaining in long non-coding RNAs. Of the  
279 1,430 exons, 858 (~77%) were cryptic, i.e. not annotated in UCSC (Suppl  
280 Table 2). LINE sequences can donate either 5' or 3' splice sites, and in ~50%  
281 of LINE-derived exons both splice sites were LINE-derived (Figure S3D).  
282 Depletion of both MATR3 and PTBP1 led to increased use of 131 (9.1%) of  
283 the LINE-derived exons (Figure 3B), with a median increase of more than five  
284 fold. Repression of these exons by the two proteins is strongly synergistic,  
285 since exon usage increased by about 1.6fold depleting MATR3 or PTBP1  
286 individually. We tested changes in inclusion of 16 splicing events significantly  
287 regulated by co-depletion of MATR3/PTBP1 by semi-quantitative RT-PCR,  
288 including six cryptic and ten annotated exons (Figure S3E), and found  
289 synergistic repression for two out of nine LINE-derived exons and two out of  
290 five LINE-proximal exons.

291 Since antisense L1 elements are rich in cryptic polyA-signals (Han et al.,  
292 2004, Lee et al., 2008), we also produced 3' end sequencing data to  
293 investigate if MATR3 and PTBP1 repress poly(A) sites in a LINE-dependent  
294 fashion. We used the expressRNA platform (Rot et al., 2017) to find  
295 alternative poly(A) site usage. We thereby annotated poly(A) site pairs in  
296 5,189 genes, in which two different polyA sites each account for at least 5% of  
297 this gene's signal (referred to as pA1 and pA2). Of these, 240 pA-sites

298 originated from a LINE repeat. LINE repeats were enriched at proximal polyA  
299 sites repressed by MATR3/PTBP1 for an extended region of ~2kb (Figure  
300 3A), reminiscent of the pattern observed on repressed exons. Overall  
301 changes in polyA site usage suggest a primarily repressive function of  
302 MATR3/PTBP1 (Figure 3C). We split all significantly regulated proximal pA-  
303 sites into those within 2kb of a LINE, and those further away from any LINE  
304 repeat, and found LINE-proximal sites to be slightly more responsive to  
305 MATR3 depletion than LINE-distant sites (Figure 3C). This is mirrored in  
306 individual examples (Figure S3 E; for instance in MROH1, an annotated  
307 alternative terminal exon with a LINE-derived 3' SS (indicated by red dashed  
308 line) is used ~70% in control cells, but entirely replaces the canonical pA site  
309 in MATR3 depleted cells accompanied by exonisation of additional sequences  
310 and an additional pA site, all from the adjacent LINEs. In PIGN1 (Figure S3F),  
311 a stretch of LINE sequences give rise to a cryptic LINE-derived terminal exon,  
312 which is used partially upon MATR3 depletion, and fully upon combined  
313 depletion of MATR3 and PTBP1, as indicated by loss of all signal on the  
314 downstream exon.

315 Metaprofiles of iCLIP binding on regulated splice- and polyA-sites showed  
316 increased binding of MATR3 and PTBP1, confirming direct targeting of these  
317 loci. LINE-derived exons were enriched in MATR3 and PTBP1 binding  
318 compared to non-repeat derived exons (Figure 3D) and those LINE-derived  
319 exons most susceptible to depletion of MATR3/PTBP1 showed strongest  
320 enrichment. MATR3 binding was extended for ~2kb upstream to ~1kb  
321 downstream of the exons, covering both splice sites. At polyA sites, MATR3  
322 and PTBP1 binding was enriched at repressed pA1 sites, with extended  
323 binding on those pA sites that were proximal to a L1 repeat.

324 We conclude that MATR3/PTBP1 are potent repressors of RNA processing at  
325 LINE repeats, thus preventing exonisation of LINEs. Similarly, polyA sites are  
326 repressed in vicinity of LINE repeats. Together, this strongly suggests that  
327 LINEs are the specificity element in directing MATR3 to alternative exons,  
328 linking its function in alternative splicing to its binding on repeat elements, and  
329 explaining the lack of a short binding motif of MATR3 *in vivo* we described in

330 the past (Coelho et al., 2015). The binding pattern of PTBP1 on LINE-derived  
331 exons was consistent with co-targeting of the same elements by MATR3 and  
332 PTBP1. Lastly, changes in abundance of LINE-derived exons suggest  
333 functional synergy of MATR3 and PTBP1 on LINE-derived exons but not on  
334 non-repeat derived alternative exons, suggesting co-ordinated assembly of  
335 both proteins is necessary to ensure complete repression of cryptic exons  
336 originating from LINE repeats.

337

### 338 **LINE-derived exons reduce transcript abundance through NMD**

339 The majority of LINE-derived exons that were detected in MATR3/PTBP1  
340 depleted cells are cryptic exons, i.e. not annotated by UCSC or ENSEMBL  
341 (Suppl Table 2). Retrotransposon-derived exons, and in particular Alu-exons,  
342 are known to be prone to spurious inclusion which generally reduces  
343 expression of the host gene through nonsense-mediated mRNA decay (NMD)  
344 (Attig et al., 2016). Given the involvement of PTBP1 in repression of LINE-  
345 derived exons, we used RNAseq data produced by Ge et al. (Ge et al., 2016)  
346 to evaluate if LINE-derived exons detected in HEK293 cells trigger NMD.  
347 Depletion of PTBP1 alone produced a marked change in abundance of  
348 LINE-derived exons, while depletion of UPF1 alone drastically increased the  
349 number of LINE-derived exons detected (Figure S4A); and this number almost  
350 doubled after combined depletion of UPF1 and PTBP1. Importantly, genes  
351 containing any of those LINE-derived exons showed increased expression in  
352 UPF1-depleted cells (Figure S4B). We conclude most LINE-derived exons are  
353 cryptic exons that, when included, render the resulting transcript susceptible  
354 to NMD.

355

### 356 **Deletion of an intronic LINE disrupts MATR3-dependent repression of a** 357 **cryptic exon in *ACAD9***

358 To confirm MATR3 and PTPB1 directly repress exons flanked by a LINE  
359 within 2kb of their splice site, even if they are not LINE-derived exons, we

360 made a splice reporter plasmid. Among 16 exons for which we validated the  
361 role of MATR3 and PTBP1 by RT-PCR (Figure S3E), 6 exons were such  
362 LINE-proximal exons, including an exon within intron1 of ACAD9.  
363 Endogenous ACAD9 splices efficiently at intron1, with two known splice  
364 isoforms of exon1 using different 5' splice sites (here referred to as *exon 1a*  
365 and *exon 1b*). We observed a two-fold loss of ACAD9 expression in cells  
366 depleted of MATR3, and a three-fold loss of expression in cells co-depleted of  
367 MATR3 and PTBP1 (Figure S4 C and D). Intron1 of ACAD9 contains three L2  
368 repeat elements in sense orientation, which all showed pronounced binding  
369 by MATR3 and PTBP1 in cultured human cells as well as binding by MATR3  
370 and PTBP2 in mouse brain (Figure S4C). We confirmed by RT-PCR that  
371 individual depletion of MATR3, but not PTBP1, led to inclusion of an  
372 alternative exon starting 323 bp upstream of the L2 repeats (Figure 4B), and  
373 verified its splice sites by Sanger sequencing. Notably, inclusion of the exon is  
374 markedly elevated after co-depletion of MATR3 and PTBP1 (Figure 4B).

375 To confirm that the LINE nucleotide sequence recruits MATR3 and PTBP1  
376 and causes distant splicing repression, we created a splice reporter of ACAD9  
377 comprising exon1 and exon2 and the complete intronic sequence including all  
378 three L2 repeats (called wildtype), and a mutant splice reporter that lacked  
379 two out of the three L2 repeats (called  $\Delta$ LINE, see Figure 4A). The wildtype  
380 reporter reproduced the splicing pattern of the endogenous sequence in  
381 non-perturbed cells and in cells depleted of MATR3, PTBP1 or both (Figure  
382 4C), except of overall more frequent usage of the 5' splice site of exon 1b.  
383 Importantly, the  $\Delta$ LINE splice reporter showed increased usage of the LINE-  
384 proximal 3' splice site in unperturbed cells, with little to no further change in  
385 inclusion upon MATR3/PTBP1 depletion (Figure 4C). Hence, the L2 sequence  
386 downstream of the exon was essential to confer responsiveness to  
387 MATR3/PTBP1. This supports our transcriptome-wide finding that MATR3  
388 and PTBP1 repress LINE-proximal exons, in addition to regulating  
389 LINE-derived exons.

390

391 **PTBP2 prevents LINE-exon inclusion in mouse brain**

392 Having identified the role of MATR3 and PTBP1 in repressing the splicing of  
393 cryptic LINE-derived exons, we sought to explore if they might play such a  
394 role also in the brain, given the known role of the PTBP1 orthologue PTBP2 in  
395 regulating splicing during neuronal development (Li et al., 2014). We first  
396 generated iCLIP data of MATR3 from mouse brain, and compared the  
397 enrichment on LINEs in the mouse brain for PTBP2, MATR3, CELF4, FUS  
398 and TARDBP. Enrichment was most pronounced for MATR3 and highest on  
399 antisense L1 sequences, to a similar extent as in HEK293 cells (Figure S5A).  
400 Interestingly, we found MATR3 and PTBP1 show stronger enrichment on  
401 rodent-specific L1 families than on evolutionary older L1 families. A MATR3  
402 knockout mouse is not available (MGI:1298379); therefore we focused on  
403 RNAseq data from PTBP2<sup>-/-</sup> mouse brain (Li et al., 2014, Vuong et al., 2016).  
404 In nestin-Cre-PTBP2<sup>-/-</sup> E18 mouse brain, we found LINE-derived exons were  
405 more likely to be significantly deregulated than SINE-derived exons or non-  
406 repeat derived exons (Figure S5B;  $\chi^2$ -test, p-value < 10<sup>-5</sup>) and were repressed  
407 by PTBP2 (Figure S5B;  $\chi^2$ -test, p-value < 10<sup>-5</sup>). Hence, we suggest repression  
408 of LINE-derived exons is redundant between PTBP1 and PTBP2. Focusing on  
409 exons with inclusion levels above 10% (measured as percent spliced index, or  
410 PSI, see SupplTable3 and 5 of (Vuong et al., 2016)), PTBP2-regulated exons  
411 in Emx-Cre-PTBP2<sup>-/-</sup> mouse brain include LINE-derived exon3 of *Fam124A*,  
412 exon5 of *Osblp9* and exon 2 of *Ub3g1*, all of which modify the protein  
413 sequence. These exons are absent or lowly included in E14 wildtype brains  
414 but their inclusion increases in the adult brain at P10 (Figure S5C to E). Out of  
415 13 LINE-derived exons selected for this pattern, 8 are rodent-specific  
416 insertions that are not shared between mouse and human. This suggests that  
417 PTBP2 preferentially represses exons derived from evolutionarily young  
418 LINEs during brain development, and several of these exons become more  
419 highly included in the wildtype adult brain, thus gaining the potential to alter  
420 the species-specific neuronal transcriptome.

421

422 **Evolutionarily old LINEs are a major source of mammalian alternative**  
423 **exons**

424 After observing exonisation of LINEs in mouse brain, we decided to survey  
425 the inclusion of LINE-derived exons in human tissues by using the extensive  
426 data available from the GTEx consortium (V6p data (Consortium, 2015)). We  
427 tested the percent inclusion of a total of 45,940 exons in RNAseq data from  
428 51 human tissue types, covering all exons of the 4,566 genes that contain a  
429 known LINE- or Alu-derived exon. We detected 1,154 LINE-derived exons  
430 with at least 5% inclusion in at least one tissue. The LINE-derived exons  
431 showed higher degree of exonisation than Alu-derived exons, measured by  
432 maximum inclusion level (PSI) across tissues (Figure S6A), but showed a  
433 similarly high degree of tissue-specificity (Figure S6B). In contrast to well-  
434 established alternative exons, Alu- and LINE-derived exons are virtually never  
435 switch-like events (Figure S6B).

436 Since we observed enrichment of PTBP2-regulated exons derived from  
437 evolutionarily younger LINE families in mouse brain (Figure S5C to E), we  
438 also further explored the evolutionary history of human LINE-derived exons.  
439 For this purpose, we determined the evolutionary age of all human L1 and L2  
440 repeats by cross-species comparison with two primate genomes (gorilla and  
441 rhesus macaque), two rodents (mouse and rat), and one each of the carnivore  
442 and laurasiatherian genomes (dog and cow, respectively), which were chosen  
443 due to the high quality of their genome assemblies. In this manner, we  
444 annotated LINEs as primate-specific, euarchontoglires-specific or  
445 mammalian-wide insertions (Figure 5A). We were able to categorise  
446 mammalian-wide insertions further by assigning if they were present in dog  
447 and cow or only one out of the two, which might indicate differences in  
448 selection pressure. We ignored elements for which the evolutionary history  
449 remained unclear, or which were present but largely sequence truncated in  
450 dog or cow. The number of substitutions of the elements from family  
451 consensus validated the average age in our annotation (Figure S6D),  
452 although we found it to be more robust on L1 than on L2 elements. Human L2  
453 elements are much older than L1s (Deininger and Batzer, 2002), which  
454 means their insertion age is frequently older than the divergence of the  
455 genomes we used. Since it remains unclear if any L2 family has remained  
456 active in early ancestors of the euarchontoglires lineage, we focused on L1

457 elements for analysis of young LINE insertions.

458 Next, we examined the proportion of L1 repeats from each phylogenetic LINE  
459 group that is capable of seeding exons. We were surprised to find that  
460 L1-derived exons are a rich source of exons in the regions of the genome that  
461 encode the highly variable and species-specific immunoglobulin variable  
462 chain region (the Ig-region on chromosomes 2, 14, 15, 16 and chr22, Figure  
463 5B). The Ig-regions are densely packed with 1,845 LINEs, 1,152 of which  
464 produce exons according to exon annotation by UCSC. The LINE-derived  
465 exons in these regions are almost exclusively seeded by primate-specific L1s  
466 (Figure 5B), and we consider them as cryptic exons, since we did not detect  
467 them by our analysis of the GTEx data. However, even when they are  
468 included, the exons are unlikely to map to the reference genome due to the  
469 rearrangement of the variable chain region during B- and T-Cell maturation.  
470 Detailed analysis of B and T cell receptor sequences will be needed to further  
471 examine the contribution of these young L1-derived exons to the expression  
472 of immunoglobulin genes. After excluding the Ig-regions, we find that less  
473 than 0.4% of the evolutionary young L1s can seed exons compared to 0.8%  
474 of the well-preserved older L1 elements, demonstrating that the older L1s  
475 more frequently contribute to the established transcriptomes across tissues  
476 (Figure S6C).

477 To quantify the differential regulation of LINE-derived exons across tissues,  
478 we calculated the maximum difference in inclusion between any pair of  
479 tissues. Interestingly, the inclusion of exons seeded by young L1 elements  
480 was more tissue-specific (Figure 5C, Figure S6E). However, exons derived  
481 from evolutionarily older LINEs generally showed higher maximum inclusion,  
482 comparing young L1 elements to either old L1 elements, or to exons derived  
483 from L2 and CR1 elements (Figure 5D). We found 594 L2- and 150 CR1-  
484 derived exons, which had inclusion levels similar to the evolutionary old L1  
485 insertions (Figure 5D). In fact, CR1-derived exons were the group with highest  
486 inclusion levels of all groups examined, which agrees with them generally  
487 being the evolutionarily oldest in human. Between tissues, we found most  
488 LINE-derived exons in tissues of the reproductive system (Testis, Fallopian



489 tube and Cervix) and the brain (considering all 13 regions of the brain; Figure  
490 S6G). Taken together, our analyses show that the evolutionarily older LINE  
491 insertions are a major source of mammal-specific alternative exons, some of  
492 which have reached high inclusion levels in different human tissues.

493

#### 494 **Loss of repressor binding drives the exonisation of LINE-derived exons**

495 To explain the differences in the inclusion level of the different evolutionary  
496 categories of LINE-derived exons, we compared their splice site strength, but  
497 did not find any marked differences (Figure S6F). Therefore, we reasoned that  
498 instead of changes in splice site strength, changes in the binding of different  
499 RBPs might determine exonisation of LINE-derived exons. To test this  
500 hypothesis, we exploited the available iCLIP and eCLIP data to analyse  
501 trends in RBP binding across the phylogenetic groups of L1 insertions. To  
502 ensure that we assessed elements that are part of expressed transcripts, we  
503 selected the 10% of L1 elements with highest coverage by any of the 121  
504 RBPs. All phylogenetic groups were represented in this selection in expected  
505 proportions. Next, we averaged the binding of each RBP against the sum of  
506 all RBPs, generating a relative binding metric among all RBPs (ranging from 0  
507 to 1). We then visualised any preferences in binding to a phylogenetic group  
508 as enrichment, considering all 49 RBPs that had above-average binding to  
509 LINEs (see Figure 1A). Strikingly, MATR3 is the RBP with strongest  
510 enrichment on primate-specific L1s among iCLIP experiments, and BCCIP  
511 and hnRNPM among eCLIP (Figure 5E). Both iCLIP and eCLIP, in both cell  
512 lines, also show PTBP1 enriched on primate-specific L1s. In general, known  
513 splicing repressors are enriched on primate-specific L1s, with the exception of  
514 hnRNPC. In contrast, RBPs that are well known to enhance splicing or  
515 3' processing also bind to evolutionarily older L1s, which includes SR  
516 proteins, and RBPs that recognise sequences close to 3' and 5' splice sites,  
517 or the polyA sites (Figure 5E, lower panels). We conclude that the stronger  
518 binding of repressive RBPs to the young L1s is the likely reason for their lower  
519 inclusion. The loss of these repressive RBPs, accompanied with binding by  
520 splice-promoting factors, can thus explain why the evolutionarily older L1s are

521 the most common source of exons, and why they tend to be more highly  
522 included.

523

524 **Sequence divergence of the evolutionarily old L1 elements results in**  
525 **loss of repressor binding**

526 To understand why the evolutionarily older LINEs do not bind repressive  
527 RBPs as well as younger insertions, we analysed the density of sequence  
528 motifs known to interact with these RBPs (Figure 6A). We found binding  
529 motifs in the literature for ELAVL1, HNRNPK, HNRNPM, KHDRBS1, QKI,  
530 PTBP1/2, RBFOX1 and TARDBP (see Suppl. Table 1 for details and  
531 references). We tested the distribution of all 256 tetramer sequences and  
532 found clear differences in line with the expected AT-richness of antisense L1  
533 sequences (Suppl. Table 6), with TG- and TA-rich motifs being quite abundant  
534 in antisense L1 and CG-rich motifs being most depleted. We found  
535 evolutionarily older L1s contained fewer binding motifs of hnRNPM, TARDBP  
536 and ELAV1 (at FDR < 0.1). We found they contained on average more  
537 binding motifs of KHDRBS1, hnRNPC and QKI, though a large proportion of  
538 evolutionarily old L1s did not contain any QKI motif and none of the motifs  
539 associated with these three was among the most enriched motifs. PTBP1  
540 motifs were highly abundant (a median of 1.26 motifs per 100nt) in all L1s,  
541 irrespective of their genomic age. We conclude the unequal binding towards  
542 L1s of RBPs, especially of splicing repressive RBPs such as hnRNPM,  
543 ELAVL1 and TARDBP, is a consequence of the L1 sequence and its decline  
544 through accumulation of sequence mutations.

545

546 **The evolutionarily young LINEs maintain the repression of deep intronic**  
547 **regions**

548 Given that we show assembly of mostly splice-repressive RBPs at and across  
549 evolutionary young LINE sequences, we hypothesised that these LINEs are in  
550 a repressed state. Furthermore, at least MATR3 and PTBP1 inhibited splicing

551 also in nearby regions, which raised the intriguing question of whether  
552 evolutionarily young LINEs are generally prohibitive for splicing. To test if  
553 young L1s act as intronic splice silencers, we examined their distribution  
554 around annotated exons as well as the inclusion of these exons across  
555 human tissues. Strikingly, we found that evolutionarily young LINEs were  
556 excluded from an approximately 3kb region around constitutive and  
557 alternative exons (Figure 6B). However, they were not excluded around those  
558 exons with very low inclusion across human tissues ( $\text{maxPSI} < 15\%$ ),  
559 indicating that they may contribute to the repression of these exons (Figure  
560 6B). In total contrast to young antisense L1 sequences, the primate-specific  
561 Alu repeats were only excluded from the immediate vicinity of exons, but not  
562 from flanking intronic regions. Older L1 elements are well tolerated up to  
563 250bp at all exons, and their incidence decreases only within  $\pm 200\text{nt}$  of  
564 constitutive exons. As independent validation, we repeated the analysis on  
565 mouse exons, and found mouse- and rodent-specific LINEs excluded in a  
566 large window around their splice sites, a pattern recapitulating the  
567 primate-specific insertions in human (Figure 6C). Thus, the evolutionarily  
568 younger antisense L1 elements are more depleted from the vicinity of exons  
569 both in primates and rodents. This could be a consequence of them being  
570 particularly potent in recruiting repressive RBPs such as MATR3 and PTBP1,  
571 which leads to repression of exons in their vicinity.

572

573

## 574 **DISCUSSION**

575 We find that tens of thousands of LINEs recruit a diverse set of 28 RBPs to  
576 deep intronic loci. Insulating RNA from the splicing and polyadenylation  
577 machinery is a known mechanism of repression used by a number of RBPs  
578 (Witten and Ule, 2011). Of the RBPs binding of LINEs many are splicing  
579 repressors, such as MATR3 and PTBP1, which repress the recognition of  
580 LINE-derived exons and polyA sites, both in cultured human cells and in  
581 PTBP2<sup>-/-</sup> mouse brain. Importantly, we demonstrate that MATR3 promotes  
582 efficient PTBP1 binding to L1s by stabilising its interaction with multivalent  
583 binding motifs.

584 The repetitive nature of LINEs and their evolutionary divergence allowed us to  
585 demonstrate a dual role of young and old LINEs in RNA processing (Figure  
586 7). Repressive RBPs preferentially bind to the young LINEs and insulate both  
587 the LINEs and the surrounding regions from the processing machineries. As a  
588 consequence, young LINEs are confined to deep intronic regions. We  
589 propose their insulation allows the accumulation of cryptic RNA processing  
590 sites and facilitate evolutionary innovation. Through the accumulation of  
591 sequence mutations, the density of repressive binding motifs is gradually  
592 decreased, and these processing sites become gradually de-repressed. This  
593 is evident by the closer proximity of older LINEs to exons, by their binding to  
594 RBPs that enhance RNA processing, and by their increased contribution to  
595 tissue-specific transcript isoforms. Thus, we find that intronic LINEs play a  
596 dual role: they recruit repressors to insulate the deep intronic regions from  
597 processing machineries, but after long evolutionary periods also act as a  
598 source of RNA processing sites that facilitate the formation of mammal-  
599 specific transcripts.

600

## 601 **MATR3 and PTBP1 bind LINEs to synergistically repress RNA** 602 **processing**

603 We found that antisense L1 and sense L2 elements recruit MATR3 and  
604 PTBP1 to deep intronic regions, where both RBPs repress RNA processing at

605 and around the bound LINEs. Binding of both proteins significantly overlaps at  
606 these LINEs, and MATR3 is required for efficient PTBP1 binding to L1s.  
607 Antisense L1s contain many PTBP1 binding motifs and MATR3-dependent  
608 binding sites of PTBP1 are characterised by increased density of binding  
609 motifs over a broad 200nt region. A model to explain our observations is that  
610 LINEs provide multivalent binding sites, and complex formation with MATR3  
611 promotes PTBP1 binding to those. PTBP1 is capable of multivalent RNA  
612 binding through its four RRM domains (Oberstrass et al., 2005). Analysis of  
613 liquid phase separation properties of PTBP1 *in vitro* recently demonstrated  
614 that its binding is mediated in part by multivalent binding sites on the RNA,  
615 and is further stabilised by fusing PTBP1 to intrinsically disordered regions  
616 (IDRs) of different proteins, due to IDR-mediated protein-protein interactions  
617 (Lin et al., 2015). It was therefore proposed that the PTB-RNA and IDR  
618 interactions could act together to produce larger oligomeric assemblies with  
619 increased affinity for RNA. PTBP1 RRM2 interacts with a short linear motif  
620 within an IDR in MATR3 (the PRI motif, Coelho et al., 2015), and MATR3  
621 interacts with itself (Zeitz et al., 2009). It seems likely that PTBP1 and MATR3  
622 assemble across the antisense L1 sequences as a larger oligomeric assembly  
623 through multivalent RNA binding. Notably, we find that one of the previously  
624 studied MATR3-repressed exons is derived from a sense L2 insertion (exon  
625 11 in ST7), and repression of this exon depends on its PRI motif (Coelho et  
626 al., 2015), indicating that the repressive function of MATR3 involves formation  
627 of a multiprotein complex with PTBP1 and possibly additional LINE-binding  
628 RBPs. Indeed, MATR3 has been reported as part of several nuclear  
629 multimeric complexes (Damianov et al., 2016, Kula et al., 2011, Zhang and  
630 Carmichael, 2001). One of these is the LASR complex, which includes  
631 hnRNPM (Damianov et al., 2016), an RBP we find preferentially binds to  
632 young antisense L1 elements much like MATR3. Taken together, our results  
633 suggest that L1 elements are sites of multivalent binding of PTBP1 and  
634 possibly other RBPs. This can provide the high avidity for assembly of  
635 repressive ribonucleoprotein complexes in order to insulate the antisense L1s  
636 and nearby RNA from RNA processing machineries.

637

## 638 **LINE-derived exons are highly tissue-specific**

639 Evolutionary young LINE insertions are bound by a large number of splice  
640 repressors. This is the likely reason why only small numbers of LINEs form  
641 canonical exons, even though most LINEs contain strong 3' and 5' splice site  
642 sequences. Based on the often ubiquitous expression of MATR3, hnRNPM  
643 and other repressive RBPs across human tissues (Petryszak et al., 2016),  
644 LINEs need to escape this repression before they can be spliced into exons.  
645 In agreement with this, we found that LINE-derived exons are alternatively  
646 spliced, with large differences in inclusion between tissues and often  
647 completely absent from most of them. For instance, 398 of the 1,169  
648 detectable LINE-derived exons are restricted to less than five tissues in  
649 humans; and in wildtype adult mouse brain, where activity of PTBP1 and  
650 PTBP2 is decreased, only a handful of LINE-derived exons become included  
651 at 10% or higher. However, we found strong de-repression of LINE-derived  
652 exons in PTBP2<sup>-/-</sup> mouse brain and in cultured human cells in the absence of  
653 MATR3 and PTBP1. Since many different RBPs bind to intronic LINEs, it is  
654 likely that the regulation of LINE elements is combinatorial, such that the  
655 abundance of multiple RBPs determines inclusion of LINE-derived exons in  
656 each tissue. In addition, most PTBP1-repressed LINE-derived exons trigger  
657 NMD, which is likely to be common across evolutionarily young LINE-derived  
658 exons. Hence, a *bona fide* LINE-derived exon has to overcome both the  
659 splicing repressive mechanisms and NMD in order to form alternative, tissue-  
660 specific exons.

661

## 662 **LINEs facilitate evolution of RNA processing**

663 To understand the forces that drive the evolutionary emergence of new LINE-  
664 derived alternative exons and poly(A) sites, we asked how the evolutionary  
665 age of LINEs affects their distribution in vicinity to exons, and the binding  
666 patterns of RBPs as surveyed by iCLIP/eCLIP. We find that intronic LINEs  
667 that recruit strong splicing repressors such as MATR3 can have repressive  
668 effects on nearby exons, which agrees with the lower inclusion of exons that

669 are located nearby young LINEs. Conversely, young LINEs are depleted from  
670 the vicinity of constitutive exons, most likely as a result of purifying selection  
671 against the insertion of novel LINEs near existing exons, or selection of exons  
672 outside the repressive environment created by LINEs. While LINEs were  
673 known to be depleted in immediate vicinity of splice sites (Zhang et al., 2011),  
674 we now find that the extent of this depletion is distinctly dependent on their  
675 evolutionary age.

676 Our analysis of RBP binding patterns on LINEs demonstrates the difference in  
677 RNP assembly at evolutionarily young and old LINEs, which mediates their  
678 functional differences. The binding of repressive RBPs is most enriched in  
679 young LINEs, whereas binding of known splicing enhancers belonging to  
680 U2AF, TIA and SR families, and CPSF machinery (CSTF2 and CPSF6), is  
681 either increased or unchanged in the older LINEs. Hence, repressive RBPs  
682 prevent recognition of cryptic splice sites in thousands of young LINEs. The  
683 further the sequence of a LINE diverges, the more likely binding of one or  
684 more repressive RBPs is lost, thus allowing individual elements to seed  
685 lineage-specific and highly tissue-specific exons with low or modest inclusion.  
686 These exons become susceptible to evolutionary selection, which sets the  
687 scene for the emergence of a few *bona fide* exons with higher inclusion,  
688 seeded by evolutionarily old LINEs. The relationship between splicing  
689 repressors and LINEs is in many ways similar to the evolutionary dynamic of  
690 KAP1/KRAB transcription factors, which repress transcription at  
691 retrotransposons and confer robustness to transcriptional networks while  
692 facilitating evolutionary novelty (Thomas and Schneider, 2011, Imbeault et al.,  
693 2017).

694

## 695 **Conclusion**

696 We propose that MATR3, PTBP1 and other repressive RBPs insulate the  
697 intronic LINEs to allow accumulation of cryptic elements. This could explain  
698 why strong RNA processing sites are prevalent in LINEs, and why LINEs  
699 remain cryptic without any deleterious effects. Evolutionarily young LINEs

700 form a main hub for the recruitment of repressive RBPs, which in turn  
701 demarcate introns by insulating cryptic elements both within and around the  
702 LINE from processing machineries. These repressive RBPs are crucial to  
703 protect gene expression from the cryptic exons derived from LINE insertions,  
704 and it appears that a network of more than two dozen of LINE-binding RBPs  
705 contribute to this repression, and some of them possibly in a cooperative  
706 manner. We note this aligns with (1) previously proposed models of exon  
707 emergence (Modrek and Lee, 2003, Xing and Lee, 2006, Attig et al., 2016), in  
708 which lowly included alternative exons are the test bed for emergence of new  
709 exons; as well as (2) the proposal that genomes accumulate cryptic variation  
710 between lineages which is only apparent upon perturbation (Ward et al., 2013,  
711 Payne and Wagner, 2015, Tirosh et al., 2010). The consequences LINES  
712 have on the transcriptome are apparent in the evolution of novel transcript  
713 isoforms, and the frequency of hereditary diseases occurring if one of these  
714 elements is unmasked.

715

716

717



## 718 **METHODS**

### 719 **Cell culture and siRNA transfection**

720 HeLa and HEK293T cells were maintained in DMEM with 10% FBS at 37°C  
721 with 5% CO<sub>2</sub> injection, and routinely passaged twice a week. Cells were  
722 regularly cultured for three days in antibiotic-free medium and tested for  
723 mycoplasma using either the LookOut Mycoplasma PCR Detection Kit or the  
724 MycoAlert mycoplasma detection kit (Lonza).

725 To deliver siRNAs, Lipofectamin RNAiMax (Life Technologies) was used  
726 according to manufacturer's recommendations. HeLa cells were grown in  
727 antibiotic-free medium and forward transfected with siRNA targeting PTBP1 at  
728 10nM (AACUCCAUCAUUCCAGAGAA) and PTBP2 at 5nM (AAGAGAGGAUCUGACGAACUA),  
729 synthesized by Dharmacon, or siRNAs purchased from Invitrogen targeting  
730 MATR3 mRNA at 5nM (HSS114732) or 20nM (HSS114730), as well as  
731 control siRNA Negative Control with medium GC content (20nM, Invitrogen,  
732 Cat. number 12935-300).

733

### 734 **Nucleo-cytoplasmic fractionation**

735 Cells were washed ice-cold PBS and lysed with NP40E-CSK (350µl per well  
736 of a 6-well-plate or 600µl per 10cm dish). NP40E-CSK buffer is similar to the  
737 cytoskeleton buffer used in (Reyes et al., 1997) and composed of 50 mM Tris-  
738 HCl (pH 6.5), 100 mM NaCl, 300 mM sucrose, 3mM MgCl<sub>2</sub>, 0.15% NP40 and  
739 40 mM EDTA). Lysis was allowed to proceed for 5 minutes on ice. HeLa cells  
740 had to be scraped off due to their strong adhesion to the culture dish.  
741 Cytoplasmic supernatant and pelleted nuclei were separated at 4°C, 5000 x g  
742 for 3 minutes. The cytoplasmic supernatant was cleared with another spin at  
743 4°C, 5000 x g for 3 minutes and another spin at 4°C, 10000 x g for 10  
744 minutes. Nuclei were washed with 400µl NP40E-CSK and incubated for 5  
745 minutes under rotation to ensure complete cell lysis. After repeat of the  
746 centrifugation step, nuclei were lysed in 300µl CLIP lysis buffer and sonicated  
747 at 5x 30sec pulses in a BioRuptor waterbath device. Subsequently, RNA was

748 isolated using Trizol LS (Invitrogen) and Zymo RNA isolation columns  
749 (Zymogen) according to manufacturer's recommendations. For preparation of  
750 RNA for RNAseq, an additional wash step with 180µl NP40E-CSK was done  
751 before nuclei rupture.

752

### 753 **Semi-quantitative RT-PCRs**

754 Reverse transcription was done with 500ng of RNA using RevertAid enzyme  
755 (Fermentas) according to manufacturer's recommendations. The reverse  
756 transcription was primed with equal parts of random N6 and N15  
757 oligonucleotides (Sigma) at 100µM concentration. For semi-quantitative PCR,  
758 we run 35 cycles of amplification with the primer combinations as indicated in  
759 each figure (primers are listed in Supplementary Table 1), and quantified the  
760 abundance of each product using Qiaxcel™ (Qiagen) gel electrophoresis.

761

### 762 **UV crosslinking assay on recombinant proteins**

763 For in vitro assays, we made two artificial sequences. The first contained two  
764 embedded AUCUU motifs (shown in bold) and CT-rich stretches in their  
765 vicinity (underlined):

766 GAATACGAATCCATATATGATCGATAAATATATGGTACCTTGCT**ATCTTACATCTTTT**ACGGATCCCATATATG  
767 ATCGATATATATAAGCT.

768 The second RNA probe contained six CTCC motifs (shown in bold):

769 GAATACGAATCCCT**CTTT**GAATCGATAA**CTCTTT**GGTACCC**CTTT**GATCGATAA**CTCTTT**GGATCC**CTCTTT**  
770 GATCGAT**CTCTTT**AAGCT.

771 The RNA probes were labelled with <sup>32</sup>P-UTP using SP6 RNA polymerase. We  
772 purified full-length N-terminal His-tagged recombinant PTBP1 (rPTBP1) and  
773 three MATR3 fragments (rMATR3, amino acids 362-592 or 'RRMs', and  
774 amino acids 341-592 or 'RRM-PRI' with or without mutations in the PRI motif),  
775 using Blue Sepharose 6 and HisTrap HP columns. In UV crosslinking assays

776 with recombinant proteins, we used 10fmol of RNA, 0.5 $\mu$ M rPTBP and titrated  
777 increasing amounts of rMATR3 fragments against it (0 to 2  $\mu$ M). After  
778 incubation at 30°C for 20 minutes, the sample was UV cross-linked on ice in a  
779 Stratalinker with 1920 milliJoule. The binding reaction was then incubated for  
780 10 minutes at 37°C together with 0.28 mg/ml RNase A1 and 0.8 U/ml RNase  
781 T1. SDS loading buffer was added and the samples heated to 90°C for 5  
782 minutes before loading on 15% denaturing polyacrylamide gel. To assay  
783 binding in HeLa nuclear extract, we prepared standard nuclear extract  
784 (Dignam et al., 1983), and combined 10fmol of RNA probe with 0.5  $\mu$ M  
785 rMATR3 and 20% extract.

786

### 787 **Generation of iCLIP data**

788 HEK293T cells were grown on 10 cm<sup>2</sup> dishes, incubated for 8 h with 100  $\mu$ M  
789 4SU and crosslinked with 2x 400mJ/cm<sup>2</sup> 365nm UV light. Protein A  
790 Dynabeads were used for immunoprecipitations (IP). 80  $\mu$ l of beads were  
791 washed in iCLIP lysis buffer (50 mM Tris-HCl pH 7.4, 100 mM NaCl,  
792 1% NP-40, 0.1% SDS, 0.5% sodium deoxycholate). For the preparation of the  
793 cell lysate, 2 million cells were lysed in 1 ml of iCLIP lysis buffer (50 mM Tris-  
794 HCl pH 7.4, 100 mM NaCl, 1% NP-40, 0.1% SDS, 0.5% sodium  
795 deoxycholate) buffer, and the remaining cell pellet was dissolved in 50  $\mu$ L  
796 MSB lysis buffer (50mM Tris-HCl pH 7.4, 100mM NaH<sub>2</sub>PO<sub>4</sub>, 7M UREA, 1mM  
797 DTT, (Reyes et al., 1997)). After the pellet had dissolved, the mixture was  
798 diluted with CLIP lysis buffer to 1000  $\mu$ l and an additional centrifugation was  
799 performed. We found by Western Blotting that up to 50% of MATR3 protein is  
800 insoluble by detergent without urea. Lysates were pooled (2ml total volume)  
801 and incubated with 4 U/ml of RNase I and 2  $\mu$ l antiRNase (1/1000, AM2690,  
802 Thermo Fisher) at 37°C for 3 min, and centrifuged. We took care to prepare  
803 the initial dilution of RNase in water, since we found that RNase I gradually  
804 loses its activity when diluted in the lysis buffer. 1.5 ml of the supernatant was  
805 then added to the beads and incubated at 4°C for 4 h. The rest of the iCLIP  
806 protocol was identical to the published protocol (Huppertz et al., 2014).

807

## 808 **Mapping of iCLIP and eCLIP data**

809 MATR3 and PTBP1 iCLIP libraries were sequenced on Illumina HiSeq2  
810 machines in a single-end manner with a read length of 50 nt. Before mapping  
811 the reads, we removed adapter sequences using the FASTX toolkit version  
812 0.7 and we discarded reads shorter than 24 nucleotides. Reads were then  
813 mapped with the iCount suite to UCSC hg19/GRCh37 or mm9/NCBI37  
814 genome assembly using Bowtie v2.0.5 allowing up to two mismatches and up  
815 to 20 multiple hits. Unique and multiple mappers were separately analysed,  
816 and to quantify binding to individual loci, only uniquely mapping reads were  
817 used. Supplementary Table 1 lists the source and details including file numbers  
818 of all published iCLIP and HITS-CLIP data used within this study.

819 The eCLIP libraries were downloaded from ENCODE (Van Nostrand et al.,  
820 2017, Sloan et al., 2016). Before mapping the reads, adapter sequences were  
821 removed using Cutadapt v1.9.dev1 and reads shorter than 18 nucleotides  
822 were dropped from the analysis. Reads were mapped with STAR v2.4.0i  
823 (Dobin et al., 2013) to UCSC hg19/GRCh37 genome assembly. To quantify  
824 binding to individual loci, only uniquely mapping reads were used. For  
825 analysis of enrichment on repeat families, up to 20 multiple alignments were  
826 allowed and fractional counts used.

827

## 828 **TEtranscript estimates of LINE family enrichments**

829 To consider both uniquely mapping and multimapping reads in estimating  
830 binding to repeat (sub)families, we used the approach described in  
831 TEtranscripts (Jin et al., 2015). In short, for eCLIP FASTQ files, adapters were  
832 removed according to the ENCODE eCLIP standard operating procedure. For  
833 iCLIP FASTQ files, barcodes were removed using the FASTX-Toolkit (v  
834 0.0.14). For all files, reads aligning to rRNA or tRNA were removed by  
835 aligning to custom rRNA and tRNA indices (human or mouse as appropriate)  
836 using Bowtie2 (v. 2.2.9). The remaining reads were aligned to the appropriate

837 genome (GRCh38, Gencode V25 for human, and GRCm38, Gencode M13 for  
838 mouse) using STAR (v. 2.5.2) with the addition of the parameters "--  
839 winAnchorMultimapNmax 100 --outFilterMultimapNmax 100" as  
840 recommended by Tetrascripts. For each CLIP dataset, Tetrascripts was  
841 run using both stranded options (--stranded reverse and --stranded  
842 yes) to obtain results for sense and antisense LINE binding.

843 RNAseq data from ENCODE was used as control, for eCLIP RNAseq of K562  
844 and HEPG2 cells lines (ENCSR885DVH and ENCSR181ZG). For iCLIP  
845 samples from mouse brain, we used P2 mouse brain from ENCODE. The  
846 iCLIP data in mouse brain was produced from total mouse brain, so we  
847 pooled the RNAseq of forebrain, midbrain and hindbrain, accession numbers  
848 ENCSR723SZV, ENCSR255SDF and ENCSR749BAG (Sloan et al., 2016).

849

#### 850 **Generation of RNAseq libraries and mapping with TopHat2 (human)**

851 Before library preparation, purified RNA was DNase I treated for a second  
852 time and purified with the DNA-free kit (Ambion). To generate stranded  
853 RNAseq libraries, we used the TruSeq stranded RNAseq library kit (Illumina)  
854 according to manufacturer's recommendations; RNA was depleted of rRNA  
855 using the RiboZero kit (Epicentre).

856 All libraries were sequenced on Illumina HiSeq2 machines in a single-end  
857 manner with a read length of 100 nt. Before mapping the reads, adapter  
858 sequences were removed using the FASTX toolkit version 0.7 and we  
859 discarded reads shorter than 24 nucleotides. Reads were then mapped with  
860 TopHat v2.0.5 (Kim et al., 2013) to UCSC hg19/GRCh37 genome assembly  
861 using ENSEMBL version 72 gene annotation as reference, allowing up to two  
862 mismatches and only using uniquely mapping hits. RNAseq data files of rRNA  
863 depleted cytoplasmic and nuclear RNA from cells depleted of MATR3 and  
864 PTBP1 are deposited on EBI ArrayExpress under the accession number  
865 E-MTAB-6204.

866

## 867 **Generation of pAseq libraries and mapping**

868 To quantify polyA site usage, we used the QuantSeq mRNA 3' end  
869 sequencing kit (Lexogen) according to manufacturer's recommendations. We  
870 used both the forward and reverse library kit on two independent biological  
871 replicates each (four replicates in total). Libraries were prepared from nuclear  
872 RNA after individual or combined siRNA depletion of MATR3 and PTBP1/2.  
873 All libraries were sequenced on Illumina HiSeq2 machines in a single-end  
874 manner with a read length of 100 nt. polyA site usage was analysed with the  
875 expressRNA platform. In short, reads were mapped with STAR v??? to UCSC  
876 hg19/GRCh37 genome assembly, allowing up to ??? mismatches and ?only  
877 using uniquely mapping hits?. pAseq raw data is deposited on ArrayExpress  
878 at E-MTAB-6287.

879

## 880 **Mapping of published RNAseq with STAR (human)**

881 To test for any change in usage of LINE-derived exons upon depletion of the  
882 NMD core factor UPF1, we made use of the data generated by Ge et al. and  
883 in HEK293 cells, depleted of PTB, UPF1 or both proteins (Ge et al., 2016).  
884 Raw sequencing data in FASTQ format was downloaded from SRA and  
885 mapped with STAR v2.5.2a (Dobin et al., 2013) to UCSC hg19/GRCh37  
886 genome assembly, allowing up to 10 mismatches and only using uniquely  
887 mapping hits. Then we analysed the data using JunctionSeq (Hartley and  
888 Mullikin, 2016) with ENSEMBL version 72 gene annotation as reference.

889

## 890 **Mapping of published RNAseq with STAR (mouse)**

891 To test for LINE-derived exon inclusion in mouse brain, we made use of the  
892 data generated by Li et al. and Vuong et al. (Li et al., 2014, Vuong et al.,  
893 2016). Raw sequencing data in FASTQ format was downloaded from SRA  
894 and mapped with STAR v2.5.2a (Dobin et al., 2013) to UCSC  
895 mm10/GRCm38 genome assembly, allowing up to 10 mismatches and only

896 using uniquely mapping hits. Then we analysed the data using JunctionSeq  
897 (Hartley and Mullikin, 2016) with ENSEMBL version 72 gene annotation as  
898 reference.

### 899 **Sequence motif analysis**

900 For PTBP1 motifs around iCLIP peaks, we used the strong binding motifs as  
901 defined previously (Haberman et al., 2017), and counted their occurrence  
902 around peak centres. To define enrichment, we divided the occurrence at  
903 MATR3-dependent and independent peaks by the distribution across all other  
904 PTBP1 peaks.

905 For motifs within antisense L1 elements, we used motifs described in the  
906 literature; for PTBP1, TARDBP and hnRNPM their binding motifs were  
907 validated in vitro and through functional studies (Gooding et al., 1998,  
908 Oberstrass et al., 2005, Avendano-Vazquez et al., 2012, Ayala et al., 2005).  
909 For all other proteins, we used RNAcompete motifs (Ray et al., 2013). The  
910 number of motifs per 100nt gave a distribution for each motif, and we used  
911 quartiles for each motif to describe gain or loss of motifs between evolutionary  
912 groups. To obtain a false discovery rate of motif gain or loss, we generated an  
913 empirical distribution of motif enrichments across groups. We compared the  
914 change in Q1 and Q4 for each of the possible 256 tetramers, which resulted in  
915 an approximately normal distribution. We then called motifs within the 2.5%  
916 and 5% extremes as significant at  $FDR < 0.05$  and  $FDR < 0.1$ .

917

### 918 **RNA maps**

919 All metaprofiles of iCLIP data and LINE sequence content around loci of  
920 interest (also called RNAmaphs) were drawn in R. Metaprofiles are normalised  
921 to the number of input loci of each track, and data was smoothed using  
922 binning as indicated in figure legends, using the zoo package. A generalised  
923 script for generation of a metaprofile can be found at  
924 <https://github.com/JAttig/generalised-Rscripts>.

925

## 926 **Annotation of known alternative exons**

927 For annotation of exons known to be alternatively spliced, we downloaded the  
928 'knownAlt Events' and 'knownGene' from UCSC TableBrowser for hg19 on  
929 28<sup>th</sup> March 2014. In addition, we downloaded the 'refGene' table on 23<sup>rd</sup>  
930 March 2017. The exons annotated by UCSC were collapsed within a gene to  
931 unique exonic ranges, and classified as alternative or constitutive exon as  
932 follows. All exons not annotated as alternative by UCSC and present in the  
933 RefSeq exon annotation with identical genomic coordinates were classified as  
934 constitutive, all other exons were considered alternative exons.

935

## 936 ***De novo* identification of cryptic exons**

937 In order to predict exons from our RNAseq data, we ran Cufflinks (version  
938 0.9.3, -min-isoform-fraction 0, Trapnell et al., 2012) on the collapsed reads  
939 from all cytoplasmic samples of our stranded RNAseq data and then extracted  
940 the exons of all predicted transcripts. After flattening the Cufflinks output to  
941 non-overlapping exonic bins, our Cufflinks prediction contained 671,956  
942 exonic bins. However, we only considered exonic bins of at least 5  
943 nucleotides in size. All exons with one or both splice sites residing within a  
944 LINE repeat (as annotated by RepeatMasker, (Smit et al., 1996-2010b)) were  
945 assigned as LINE-exons. In order to minimise noise, we only kept exons for  
946 analysis that were supported by at least one junction-spanning read (225,322  
947 exonic bins). All exons that were not identical with exons annotated in UCSC  
948 gene annotation (hg19) were referred to as 'cryptic' (see also Supplementary  
949 Table 2) for complete breakdown of annotation of exonic bins). For readability,  
950 we refer to 'exonic bins' as 'exons' throughout the text.

951

## 952 **Analysis of differential gene expression and differential exon inclusion**

953 Analyses of differential gene expression were performed using DESeq2



954 (Anders and Huber, 2010, Love et al., 2014) with gene coordinates based on  
955 ENSEMBL annotation (version 72). To combine the results from both siRNAs  
956 targeting MATR3, we used a conditional thresholding approach, calling  
957 expression changes as significant if they had an adjusted p-value < 0.01 in at  
958 least one of the two depletion conditions and an adjusted p-value < 0.05 in the  
959 other. Differential splicing was determined using DEXSeq (Anders et al.,  
960 2012), and the two MATR3 depletion conditions were combined by conditional  
961 thresholding accordingly.

962

### 963 **Analysis of exon inclusion in human tissues**

964 To analyse inclusion of exons across human tissues, we retrieved data on  
965 mapped junctions from the V6p release of the GTEx consortium  
966 (<http://www.gtexportal.org/home/>, (Consortium, 2015)). We used  
967 UCSC/RefSeq annotation (see above) and isolated all LINE-derived exons as  
968 well as Alu-exons. Then, we selected all exons from genes with at least one  
969 Alu- or LINE-derived exon. We identified junction-spanning reads to each of  
970 these exons in a 2 nt grace window around the splice and used those to  
971 identify the 5' and 3' splice site of the upstream and downstream exon. We  
972 then calculated percent spliced in (PSI) index as the ratio of inclusion junction  
973 reads (average of up+downstream junctions) to total junction reads (average  
974 of up+downstream junctions + skipping junctions), and inclusion within each  
975 tissue as average of all samples. We only allowed a single exon inclusion  
976 isoform across tissues (i.e. identical flanking exons) and choose the isoform  
977 with more junction reads. To ensure sequencing depth and gene expression  
978 were sufficient to calculate exon inclusion, we only used exons with at least  
979 200 reads across the 8,555 samples (average of up+downstream junctions or  
980 skipping junctions). If an exon was absent in any tissue, as judged by  
981 absence of any junction spanning read and any read for the skipping junction,  
982 it was treated as 'data not available' for this particular tissue. In total, we  
983 covered 45,940 exons across 52 tissues and subtissues, which were adipose  
984 tissue (subcutaneous and visceral omentum), adrenal glands, artery (aorta,

985 tibial and coronary artery), bladder, brain, breast, cervix (ecto- and endo-  
986 cervix), colon (sigmoid and transverse), esophagus (mucosa, muscularis and  
987 gastroesophageal junction), fallopian tube, heart (atrial appendage and left  
988 ventricle), kidney (cortex), liver, lung, skeletal muscle, nerve tissue (amygdala,  
989 anterior cingulate cortex, caudate basal ganglia, cerebellar hemisphere,  
990 cerebellum, cortex, frontal cortex, hippocampus, hypothalamus, nucleus  
991 accumbens basal ganglia, putamen basal ganglia, cervical spinal cord,  
992 substantia nigra, tibial), ovary, pancreas, pituitary, prostate, minor salivary  
993 gland, small intestine terminal ileum), spleen, skin (suprapubic and lower leg),  
994 stomach, thyroid, testis, uterus and vagina, as well as EBV transformed  
995 lymphocytes and transformed fibroblasts. We did not use data from whole  
996 blood, which had poor coverage on most genes. On top of the PSI index for  
997 each tissue, we collated the data across tissues and computed the maximum  
998 difference in PSI between the tissue(s) with highest inclusion and lowest  
999 inclusion of each exon. Because testis is known to be a very promiscuously  
1000 transcribed tissue (Soumillon et al., 2013) and accordingly showed many  
1001 LINE-derived exons exclusively observed in the testis, we only included exons  
1002 which showed at least 5% inclusion in any tissue, except testis.

1003

#### 1004 **Classification of repeat element age by divergence or phylogenetic** 1005 **tracing**

1006 To compare the divergence of LINE insertions from their consensus  
1007 sequence, we used the nucleotide difference / 1000nt, which is provided for  
1008 each repeat element by the RepeatMasker table (hg19, Repeat Library  
1009 20090604, (Smit et al., 1996-2010a)).

1010 For phylogenetic tracing, we tested for presence of orthologues positions with  
1011 the UCSC Genome Browser LiftOver tool (Rosenbloom et al., 2015), using  
1012 the respective all-chain BLASTZ files. Human and mouse LINE repeats from  
1013 hg19 and mm9 RepeatMasker annotation were first lifted to hg38 and mm10.  
1014 We then tested for the presence of each LINE repeat in the human and  
1015 mouse lineage by retrieving orthologue genomic loci for the genomes of

1016 rhesus macaque (rheMac8), gorilla (gorGor5), mouse (mm10), rat (rn6), dog  
1017 (canFam3) and cow (bosTau8). To curate the LiftOver results and safeguard  
1018 against misannotation by errors in the genome lift, we cross-referenced for all  
1019 liftover positions if the element overlaps with a LINE annotated by  
1020 RepeatMasker for the respective genome, and only refer to the element as  
1021 present in a species if at least 33% of the lifted genomic position are LINE-  
1022 derived as annotated by RepeatMasker. All other elements are either  
1023 'notLINE' if they were not identified by RepeatMasker, 'degenerate' if LiftOver  
1024 reported them as 'partially-deleted', or 'absent' if LiftOver reported them as  
1025 'deleted'. Elements from hg19 that were not 'present' in hg38 were discarded  
1026 entirely. Then we converted the LiftOver annotation to phylogenetic groups  
1027 after manual inspection of the liftover results in the following manner. We  
1028 denoted elements as human- and primate-specific, which are 'absent' in all  
1029 other species. We denoted additional elements as primate-specific, if they  
1030 were either 'present', 'degenerate' or 'notLINE' in at least one of the two  
1031 primate species, and 'absent' or 'notLINE' in all of the others. We denoted  
1032 elements as specific for the euarchontoglires branch, if the element was  
1033 'absent' or 'notLINE' in the two laurasiatherian species, and 'present' or  
1034 'degenerate' in mouse or rat. The remaining elements were all lifted towards  
1035 at least one of the two laurasiatherian species, and hence present in the last  
1036 common ancestor of the species we surveyed. Elements present in one but  
1037 absent in the other were denoted as found in 'one distant species', elements  
1038 present in both as found in 'two distant species'. All remaining elements were  
1039 either reported as degenerate in both species, or the liftover results were  
1040 'unclear' (for example if the element was lifted to many species but did not  
1041 overlap with the LINE annotation in any of those). In either case, we ignored  
1042 the corresponding element for phylogenetic comparisons. Group sizes for the  
1043 hg19 assembly were:

---

|                                      |        |
|--------------------------------------|--------|
| Primate-specific LINE insertions     | 516720 |
| Euarchontoglires-specific insertions | 64490  |
| One-distant species                  | 243610 |

---

---

|                               |        |
|-------------------------------|--------|
| Two-distant species           | 73965  |
| Sequence degenerated elements | 227587 |
| unclear liftover results      | 274273 |

---

1044

## 1045 **Statistics**

1046 Whenever referred to in the text, *replicates* stands for biological replicates,  
1047 defined as samples collected independently of one another in separated  
1048 experiments. All experiments were done with biological replicates as indicated  
1049 in Methods and Figure legends. In case of the iCLIP experiments from  
1050 MATR3 or PTBP1 depleted cells, sequencing files were pooled across 2  
1051 biological replicates because coverage varied widely within them, and only the  
1052 pooled data was used.

1053 All statistical analyses were performed in the R software environment (version  
1054 3.1.3) or in GraphPad PRISM6. We made use of nonparametric tests in all  
1055 statistical tests, since data distributions failed to conform with the assumption  
1056 of normality and equal variance (homoscedasticity), assessed visually with  
1057 qqnorm plots. Statistical tests are listed in figure legends. To compare multiple  
1058 groups we used the Kruskal-Wallis Rank Sum test, and made pairwise  
1059 comparisons with Dunn's test corrected according to Holm-Sidak, using  
1060 functions implemented in the *stats* and the *dunn.test* (Dinno, 2017) R  
1061 packages.

1062

## 1063 **ACKNOWLEDGEMENTS**

1064 The authors are grateful to Michael Briese, Laura Easton, Ina Huppertz and  
1065 James Tollervey for sharing unpublished iCLIP data. We thank Ina Huppertz  
1066 and Igor Ruiz de los Mozos for assistance and scientific discussion, Sarah K.  
1067 Jurmeister for critical comments on this manuscript and Gavin Kelly for  
1068 valuable advice. We thank the Genomics Facility Team of the CRUK

1069 Cambridge Cancer Institute and Deborah Hughes of the UCL Institute of  
1070 Neurology for processing libraries for high-throughput sequencing, and  
1071 Gregor Rot for mRNA 3' end sequencing mapping on the expressRNA  
1072 platform. This work was supported by the European Research Council  
1073 (617837-Translate to J.U.), the Wellcome Trust with a Wellcome Trust Joint  
1074 Investigator Award (103760/Z/14/Z; to J.U. and N.L.), a Wellcome Trust  
1075 Programme grant (092900; to CWJS) and a PhD Training Fellowship for  
1076 Clinicians Award (110292/Z/15/Z; to A.C.), and a Boehringer Ingelheim Fond  
1077 PhD fellowship (to J.A.). This work was supported by the Francis Crick  
1078 Institute, which receives its core funding from Cancer Research UK  
1079 (FC001110), the UK Medical Research Council (FC001110), and the  
1080 Wellcome Trust (FC001110) (N.L., J.A., F.A., A.C.). Animal shapes in Figure  
1081 5 were obtained from PhyloPic and are used under the Creative Commons  
1082 Attribution-NonCommercial-ShareAlike 3.0 Unported license. Images created  
1083 by Michael Kessey, David Liao and Maija Karala.

1084

#### 1085 **AUTHOR CONTRIBUTIONS**

1086 J.A., C.G., C.W.J.S and J.U. conceived the project and designed the  
1087 experiments. F. A. supervised computational analysis. J.A., C.G. and A.S.  
1088 performed experiments, and J.A., F.A., A.C., N.H. and W.E. performed  
1089 computational analysis. J.A., F.A, C.S., N.L. and J.U. interpreted and  
1090 conceptualised primary data.

1091

#### 1092 **DECLARATION OF INTERESTS**

1093 The author declare no competing interests.

1094

1095 **REFERENCES**

1096

- 1097 ANDERS, S. & HUBER, W. 2010. Differential expression analysis for  
1098 sequence count data. *Genome Biol*, 11, R106.
- 1099 ANDERS, S., REYES, A. & HUBER, W. 2012. Detecting differential usage of  
1100 exons from RNA-seq data. *Genome Res*, 22, 2008-17.
- 1101 ATTIG, J., RUIZ DE LOS MOZOS, I., HABERMAN, N., WANG, Z., EMMETT,  
1102 W., ZARNACK, K., KONIG, J. & ULE, J. 2016. Splicing repression  
1103 allows the gradual emergence of new Alu-exons in primate evolution.  
1104 *Elife*, 5, e19545.
- 1105 AVENDANO-VAZQUEZ, S. E., DHIR, A., BEMBICH, S., BURATTI, E.,  
1106 PROUDFOOT, N. & BARALLE, F. E. 2012. Autoregulation of TDP-43  
1107 mRNA levels involves interplay between transcription, splicing, and  
1108 alternative polyA site selection. *Genes Dev*, 26, 1679-84.
- 1109 AYALA, Y. M., PANTANO, S., D'AMBROGIO, A., BURATTI, E., BRINDISI, A.,  
1110 MARCHETTI, C., ROMANO, M. & BARALLE, F. E. 2005. Human,  
1111 Drosophila, and C.elegans TDP43: nucleic acid binding properties and  
1112 splicing regulatory function. *J Mol Biol*, 348, 575-88.
- 1113 BECK, C. R., COLLIER, P., MACFARLANE, C., MALIG, M., KIDD, J. M.,  
1114 EICHLER, E. E., BADGE, R. M. & MORAN, J. V. 2010. LINE-1  
1115 retrotransposition activity in human genomes. *Cell*, 141, 1159-70.
- 1116 BELANCIO, V. P., HEDGES, D. J. & DEININGER, P. 2006. LINE-1 RNA  
1117 splicing and influences on mammalian gene expression. *Nucleic Acids  
1118 Res*, 34, 1512-21.
- 1119 BROUHA, B., SCHUSTAK, J., BADGE, R. M., LUTZ-PRIGGE, S., FARLEY,  
1120 A. H., MORAN, J. V. & KAZAZIAN, H. H., JR. 2003. Hot L1s account  
1121 for the bulk of retrotransposition in the human population. *Proc Natl  
1122 Acad Sci U S A*, 100, 5280-5.
- 1123 COELHO, M. B., ATTIG, J., BELLORA, N., KONIG, J., HALLEGGER, M.,  
1124 KAYIKCI, M., EYRAS, E., ULE, J. & SMITH, C. W. 2015. Nuclear  
1125 matrix protein MatrIn3 regulates alternative splicing and forms  
1126 overlapping regulatory networks with PTB. *EMBO J*, 34, 653-668.
- 1127 CONSORTIUM, G. T. 2015. Human genomics. The Genotype-Tissue  
1128 Expression (GTEx) pilot analysis: multitissue gene regulation in  
1129 humans. *Science*, 348, 648-60.
- 1130 DAMIANOV, A., YING, Y., LIN, C. H., LEE, J. A., TRAN, D., VASHISHT, A.  
1131 A., BAHRAMI-SAMANI, E., XING, Y., MARTIN, K. C.,  
1132 WOHLSCHLEGEL, J. A. & BLACK, D. L. 2016. Rbfox Proteins  
1133 Regulate Splicing as Part of a Large Multiprotein Complex LASR. *Cell*,  
1134 165, 606-19.
- 1135 DEININGER, P. L. & BATZER, M. A. 2002. Mammalian retroelements.  
1136 *Genome Res*, 12, 1455-65.
- 1137 DIGNAM, J. D., LEOVITZ, R. M. & ROEDER, R. G. 1983. Accurate  
1138 transcription initiation by RNA polymerase II in a soluble extract from  
1139 isolated mammalian nuclei. *Nucleic Acids Res*, 11, 1475-89.
- 1140 DINNO, A. 2017. dunn.test: Dunn's Test of Multiple Comparisons Using Rank  
1141 Sums. R  
1142 package version 1.3.4.

- 1143 DOBIN, A., DAVIS, C. A., SCHLESINGER, F., DRENKOW, J., ZALESKI, C.,  
1144 JHA, S., BATUT, P., CHAISSON, M. & GINGERAS, T. R. 2013. STAR:  
1145 ultrafast universal RNA-seq aligner. *Bioinformatics*, 29, 15-21.
- 1146 EOM, T., ZHANG, C., WANG, H., LAY, K., FAK, J., NOEBELS, J. L. &  
1147 DARNELL, R. B. 2013. NOVA-dependent regulation of cryptic NMD  
1148 exons controls synaptic protein levels after seizure. *Elife*, 2, e00178.
- 1149 GE, Z., QUEK, B. L., BEEMON, K. L. & HOGG, J. R. 2016. Polypyrimidine  
1150 tract binding protein 1 protects mRNAs from recognition by the  
1151 nonsense-mediated mRNA decay pathway. *Elife*, 5.
- 1152 GOODIER, J. L., CHEUNG, L. E. & KAZAZIAN, H. H., JR. 2012. MOV10 RNA  
1153 helicase is a potent inhibitor of retrotransposition in cells. *PLoS Genet*,  
1154 8, e1002941.
- 1155 GOODIER, J. L., CHEUNG, L. E. & KAZAZIAN, H. H., JR. 2013. Mapping the  
1156 LINE1 ORF1 protein interactome reveals associated inhibitors of  
1157 human retrotransposition. *Nucleic Acids Res*, 41, 7401-19.
- 1158 GOODING, C., ROBERTS, G. C. & SMITH, C. W. 1998. Role of an inhibitory  
1159 pyrimidine element and polypyrimidine tract binding protein in  
1160 repression of a regulated alpha-tropomyosin exon. *RNA*, 4, 85-100.
- 1161 HABERMAN, N., HUPPERTZ, I., ATTIG, J., KONIG, J., WANG, Z., HAUER,  
1162 C., HENTZE, M. W., KULOZIK, A. E., LE HIR, H., CURK, T., SIBLEY,  
1163 C. R., ZARNACK, K. & ULE, J. 2017. Insights into the design and  
1164 interpretation of iCLIP experiments. *Genome Biol*, 18, 7.
- 1165 HAN, J. S., SZAK, S. T. & BOEKE, J. D. 2004. Transcriptional disruption by  
1166 the L1 retrotransposon and implications for mammalian transcriptomes.  
1167 *Nature*, 429, 268-74.
- 1168 HARTLEY, S. W. & MULLIKIN, J. C. 2016. Detection and visualization of  
1169 differential splicing in RNA-Seq data with JunctionSeq. *Nucleic Acids  
1170 Res*, 44, e127.
- 1171 HUANG, C. R., SCHNEIDER, A. M., LU, Y., NIRANJAN, T., SHEN, P.,  
1172 ROBINSON, M. A., STERANKA, J. P., VALLE, D., CIVIN, C. I., WANG,  
1173 T., WHEELAN, S. J., JI, H., BOEKE, J. D. & BURNS, K. H. 2010.  
1174 Mobile interspersed repeats are major structural variants in the human  
1175 genome. *Cell*, 141, 1171-82.
- 1176 HUPPERTZ, I., ATTIG, J., D'AMBROGIO, A., EASTON, L. E., SIBLEY, C. R.,  
1177 SUGIMOTO, Y., TAJNIK, M., KONIG, J. & ULE, J. 2014. iCLIP:  
1178 protein-RNA interactions at nucleotide resolution. *Methods*, 65, 274-87.
- 1179 IMBEAULT, M., HELLEBOID, P. Y. & TRONO, D. 2017. KRAB zinc-finger  
1180 proteins contribute to the evolution of gene regulatory networks.  
1181 *Nature*, 543, 550-554.
- 1182 JIN, Y., TAM, O. H., PANIAGUA, E. & HAMMELL, M. 2015. Tetrascripts: a  
1183 package for including transposable elements in differential expression  
1184 analysis of RNA-seq datasets. *Bioinformatics*.
- 1185 JURKA, J. 1998. Repeats in genomic DNA: mining and meaning. *Curr Opin  
1186 Struct Biol*, 8, 333-7.
- 1187 KELLEY, D. R., HENDRICKSON, D. G., TENEN, D. & RINN, J. L. 2014.  
1188 Transposable elements modulate human RNA abundance and splicing  
1189 via specific RNA-protein interactions. *Genome Biol*, 15, 537.
- 1190 KIM, D., PERTEA, G., TRAPNELL, C., PIMENTEL, H., KELLEY, R. &  
1191 SALZBERG, S. L. 2013. TopHat2: accurate alignment of  
1192 transcriptomes in the presence of insertions, deletions and gene

- 1193 fusions. *Genome Biol*, 14, R36.
- 1194 KULA, A., GUERRA, J., KNEZEVICH, A., KLEVA, D., MYERS, M. P. &  
1195 MARCELLO, A. 2011. Characterization of the HIV-1 RNA associated  
1196 proteome identifies MatrIn 3 as a nuclear cofactor of Rev function.  
1197 *Retrovirology*, 8, 60.
- 1198 LEE, J. Y., JI, Z. & TIAN, B. 2008. Phylogenetic analysis of mRNA  
1199 polyadenylation sites reveals a role of transposable elements in  
1200 evolution of the 3'-end of genes. *Nucleic Acids Res*, 36, 5581-90.
- 1201 LI, Q., ZHENG, S., HAN, A., LIN, C. H., STOILOV, P., FU, X. D. & BLACK, D.  
1202 L. 2014. The splicing regulator PTBP2 controls a program of embryonic  
1203 splicing required for neuronal maturation. *Elife*, 3, e01201.
- 1204 LIN, Y., PROTTER, D. S., ROSEN, M. K. & PARKER, R. 2015. Formation and  
1205 Maturation of Phase-Separated Liquid Droplets by RNA-Binding  
1206 Proteins. *Mol Cell*, 60, 208-19.
- 1207 LING, J. P., CHHABRA, R., MERRAN, J. D., SCHAUGHENCY, P. M.,  
1208 WHEELAN, S. J., CORDEN, J. L. & WONG, P. C. 2016. PTBP1 and  
1209 PTBP2 Repress Nonconserved Cryptic Exons. *Cell Rep*, 17, 104-113.
- 1210 LOVE, M. I., HUBER, W. & ANDERS, S. 2014. Moderated estimation of fold  
1211 change and dispersion for RNA-seq data with DESeq2. *Genome Biol*,  
1212 15, 550.
- 1213 MEISCHL, C., BOER, M., AHLIN, A. & ROOS, D. 2000. A new exon created  
1214 by intronic insertion of a rearranged LINE-1 element as the cause of  
1215 chronic granulomatous disease. *Eur J Hum Genet*, 8, 697-703.
- 1216 MERKIN, J. J., CHEN, P., ALEXIS, M. S., HAUTANIEMI, S. K. & BURGE, C.  
1217 B. 2015. Origins and impacts of new mammalian exons. *Cell Rep*, 10,  
1218 1992-2005.
- 1219 MGI:1298379: International Mouse Phenotyping consortium database.  
1220 Accessed last 03/10/2017.
- 1221 MODREK, B. & LEE, C. J. 2003. Alternative splicing in the human, mouse and  
1222 rat genomes is associated with an increased frequency of exon  
1223 creation and/or loss. *Nat Genet*, 34, 177-80.
- 1224 O'LEARY, M. A., BLOCH, J. I., FLYNN, J. J., GAUDIN, T. J.,  
1225 GIALLOMBARDO, A., GIANNINI, N. P., GOLDBERG, S. L., KRAATZ,  
1226 B. P., LUO, Z. X., MENG, J., NI, X., NOVACEK, M. J., PERINI, F. A.,  
1227 RANDALL, Z. S., ROUGIER, G. W., SARGIS, E. J., SILCOX, M. T.,  
1228 SIMMONS, N. B., SPAULDING, M., VELAZCO, P. M., WEKSLER, M.,  
1229 WIBLE, J. R. & CIRRANELLO, A. L. 2013. The placental mammal  
1230 ancestor and the post-K-Pg radiation of placentals. *Science*, 339, 662-  
1231 7.
- 1232 OBERSTRASS, F. C., AUWETER, S. D., ERAT, M., HARGOUS, Y.,  
1233 HENNING, A., WENTER, P., REYMOND, L., AMIR-AHMADY, B.,  
1234 PITSCH, S., BLACK, D. L. & ALLAIN, F. H. 2005. Structure of PTB  
1235 bound to RNA: specific binding and implications for splicing regulation.  
1236 *Science*, 309, 2054-7.
- 1237 PAYNE, J. L. & WAGNER, A. 2015. Mechanisms of mutational robustness in  
1238 transcriptional regulation. *Front Genet*, 6, 322.
- 1239 PETRYSZAK, R., KEAYS, M., TANG, Y. A., FONSECA, N. A., BARRERA, E.,  
1240 BURDETT, T., FULLGRABE, A., FUENTES, A. M., JUPP, S.,  
1241 KOSKINEN, S., MANNION, O., HUERTA, L., MEGY, K., SNOW, C.,  
1242 WILLIAMS, E., BARZINE, M., HASTINGS, E., WEISSER, H.,



- 1243 WRIGHT, J., JAISWAL, P., HUBER, W., CHOUDHARY, J.,  
1244 PARKINSON, H. E. & BRAZMA, A. 2016. Expression Atlas update--an  
1245 integrated database of gene and protein expression in humans,  
1246 animals and plants. *Nucleic Acids Res*, 44, D746-52.
- 1247 RAY, D., KAZAN, H., COOK, K. B., WEIRAUCH, M. T., NAJAFABADI, H. S.,  
1248 LI, X., GUEROUSSOV, S., ALBU, M., ZHENG, H., YANG, A., NA, H.,  
1249 IRIMIA, M., MATZAT, L. H., DALE, R. K., SMITH, S. A., YAROSH, C.  
1250 A., KELLY, S. M., NABET, B., MECENAS, D., LI, W., LAISHRAM, R.  
1251 S., QIAO, M., LIPSHITZ, H. D., PIANO, F., CORBETT, A. H.,  
1252 CARSTENS, R. P., FREY, B. J., ANDERSON, R. A., LYNCH, K. W.,  
1253 PENALVA, L. O., LEI, E. P., FRASER, A. G., BLENCOWE, B. J.,  
1254 MORRIS, Q. D. & HUGHES, T. R. 2013. A compendium of RNA-  
1255 binding motifs for decoding gene regulation. *Nature*, 499, 172-7.
- 1256 REED, R. 2000. Mechanisms of fidelity in pre-mRNA splicing. *Curr Opin Cell*  
1257 *Biol*, 12, 340-5.
- 1258 REYES, J. C., MUCHARDT, C. & YANIV, M. 1997. Components of the human  
1259 SWI/SNF complex are enriched in active chromatin and are associated  
1260 with the nuclear matrix. *The Journal of cell biology*, 137, 263-74.
- 1261 ROSENBLOOM, K. R., ARMSTRONG, J., BARBER, G. P., CASPER, J.,  
1262 CLAWSON, H., DIEKHANS, M., DRESZER, T. R., FUJITA, P. A.,  
1263 GURUVADOO, L., HAEUSSLER, M., HARTE, R. A., HEITNER, S.,  
1264 HICKEY, G., HINRICHS, A. S., HUBLEY, R., KAROLCHIK, D.,  
1265 LEARNED, K., LEE, B. T., LI, C. H., MIGA, K. H., NGUYEN, N.,  
1266 PATEN, B., RANEY, B. J., SMIT, A. F., SPEIR, M. L., ZWEIG, A. S.,  
1267 HAUSSLER, D., KUHN, R. M. & KENT, W. J. 2015. The UCSC  
1268 Genome Browser database: 2015 update. *Nucleic Acids Res*, 43,  
1269 D670-81.
- 1270 ROT, G., WANG, Z., HUPPERTZ, I., MODIC, M., LENCE, T., HALLEGGER,  
1271 M., HABERMAN, N., CURK, T., VON MERING, C. & ULE, J. 2017.  
1272 High-Resolution RNA Maps Suggest Common Principles of Splicing  
1273 and Polyadenylation Regulation by TDP-43. *Cell Rep*, 19, 1056-1067.
- 1274 SCHWAHN, U., LENZNER, S., DONG, J., FEIL, S., HINZMANN, B., VAN  
1275 DUIJNHOFEN, G., KIRSCHNER, R., HEMBERGER, M., BERGEN, A.  
1276 A., ROSENBERG, T., PINCKERS, A. J., FUNDELE, R., ROSENTHAL,  
1277 A., CREMERS, F. P., ROPERS, H. H. & BERGER, W. 1998. Positional  
1278 cloning of the gene for X-linked retinitis pigmentosa 2. *Nat Genet*, 19,  
1279 327-32.
- 1280 SEMLOW, D. R. & STALEY, J. P. 2012. Staying on message: ensuring fidelity  
1281 in pre-mRNA splicing. *Trends Biochem Sci*, 37, 263-73.
- 1282 SIBLEY, C. R., BLAZQUEZ, L. & ULE, J. 2016. Lessons from non-canonical  
1283 splicing. *Nat Rev Genet*, 17, 407-21.
- 1284 SLOAN, C. A., CHAN, E. T., DAVIDSON, J. M., MALLADI, V. S., STRATTAN,  
1285 J. S., HITZ, B. C., GABDANK, I., NARAYANAN, A. K., HO, M., LEE, B.  
1286 T., ROWE, L. D., DRESZER, T. R., ROE, G., PODDUTURI, N. R.,  
1287 TANAKA, F., HONG, E. L. & CHERRY, J. M. 2016. ENCODE data at  
1288 the ENCODE portal. *Nucleic Acids Res*, 44, D726-32.
- 1289 SMIT, A., HUBLEY, R. & GREEN, P. 1996-2010a. RepeatMasker Open-3.0.  
1290 <http://www.repeatmasker.org>.
- 1291 SMIT, A. F., HUBLEY, R. & GREEN, P. 1996-2010b. RepeatMasker Open-  
1292 3.0. <http://www.repeatmasker.org>.

- 1293 SOUMILLON, M., NECSULEA, A., WEIER, M., BRAWAND, D., ZHANG, X.,  
1294 GU, H., BARTHES, P., KOKKINAKI, M., NEF, S., GNIRKE, A., DYM,  
1295 M., DE MASSY, B., MIKKELSEN, T. S. & KAESSMANN, H. 2013.  
1296 Cellular source and mechanisms of high transcriptome complexity in  
1297 the mammalian testis. *Cell Rep*, 3, 2179-90.
- 1298 TAYLOR, M. S., LACAVA, J., MITA, P., MOLLOY, K. R., HUANG, C. R., LI,  
1299 D., ADNEY, E. M., JIANG, H., BURNS, K. H., CHAIT, B. T., ROUT, M.  
1300 P., BOEKE, J. D. & DAI, L. 2013. Affinity proteomics reveals human  
1301 host factors implicated in discrete stages of LINE-1 retrotransposition.  
1302 *Cell*, 155, 1034-48.
- 1303 THOMAS, J. H. & SCHNEIDER, S. 2011. Coevolution of retroelements and  
1304 tandem zinc finger genes. *Genome Res*, 21, 1800-12.
- 1305 TIROSH, I., REIKHAV, S., SIGAL, N., ASSIA, Y. & BARKAI, N. 2010.  
1306 Chromatin regulators as capacitors of interspecies variations in gene  
1307 expression. *Mol Syst Biol*, 6, 435.
- 1308 TRAPNELL, C., ROBERTS, A., GOFF, L., PERTEA, G., KIM, D., KELLEY, D.  
1309 R., PIMENTEL, H., SALZBERG, S. L., RINN, J. L. & PACHTER, L.  
1310 2012. Differential gene and transcript expression analysis of RNA-seq  
1311 experiments with TopHat and Cufflinks. *Nat Protoc*, 7, 562-78.
- 1312 VAN NOSTRAND, E. L., FREESE, P., PRATT, G. A., WANG, X., WEI, X.,  
1313 BLUE, S. M., DOMINGUEZ, D., CODY, N. A. L., OLSON, S.,  
1314 SUNDARARAMAN, B., XIAO, R., ZHAN, L., BAZILE, C., BENOIT  
1315 BOUVRETTE, L. P., CHEN, J., DUFF, M. O., GARCIA, K., GELBOIN-  
1316 BURKHART, C., HOCHMAN, A., LAMBERT, N. J., LI, H., NGUYEN, T.  
1317 B., PALDEN, T., RABANO, I., SATHE, S., STANTON, R., LOUIE, A. L.,  
1318 AIGNER, S., BERGALET, J., ZHOU, B., SU, A., WANG, R., YEE, B.  
1319 A., FU, X.-D., LECUYER, E., BURGE, C. B., GRAVELEY, B. & YEO,  
1320 G. W. 2017. A Large-Scale Binding and Functional Map of Human  
1321 RNA Binding Proteins. *bioRxiv*.
- 1322 VORECHOVSKY, I. 2010. Transposable elements in disease-associated  
1323 cryptic exons. *Hum Genet*, 127, 135-54.
- 1324 VUONG, J. K., LIN, C. H., ZHANG, M., CHEN, L., BLACK, D. L. & ZHENG, S.  
1325 2016. PTBP1 and PTBP2 Serve Both Specific and Redundant  
1326 Functions in Neuronal Pre-mRNA Splicing. *Cell Rep*, 17, 2766-2775.
- 1327 WARD, M. C., WILSON, M. D., BARBOSA-MORAIS, N. L., SCHMIDT, D.,  
1328 STARK, R., PAN, Q., SCHWALIE, P. C., MENON, S., LUKK, M.,  
1329 WATT, S., THYBERT, D., KUTTER, C., KIRSCHNER, K., FLICEK, P.,  
1330 BLENCOWE, B. J. & ODOM, D. T. 2013. Latent regulatory potential of  
1331 human-specific repetitive elements. *Mol Cell*, 49, 262-72.
- 1332 WITTEN, J. T. & ULE, J. 2011. Understanding splicing regulation through  
1333 RNA splicing maps. *Trends Genet*, 27, 89-97.
- 1334 XING, Y. & LEE, C. 2006. Alternative splicing and RNA selection pressure--  
1335 evolutionary consequences for eukaryotic genomes. *Nat Rev Genet*, 7,  
1336 499-509.
- 1337 YEO, G. & BURGE, C. B. 2004. Maximum entropy modeling of short  
1338 sequence motifs with applications to RNA splicing signals. *J Comput  
1339 Biol*, 11, 377-94.
- 1340 YOSHIDA, K., NAKAMURA, A., YAZAKI, M., IKEDA, S. & TAKEDA, S. 1998.  
1341 Insertional mutation by transposable element, L1, in the DMD gene  
1342 results in X-linked dilated cardiomyopathy. *Hum Mol Genet*, 7, 1129-

- 1343 32.  
1344 ZEITZ, M. J., MALYAVANTHAM, K. S., SEIFERT, B. & BEREZNEY, R. 2009.  
1345 Matrin 3: chromosomal distribution and protein interactions. *J Cell*  
1346 *Biochem*, 108, 125-33.  
1347 ZHANG, Y., ROMANISH, M. T. & MAGER, D. L. 2011. Distributions of  
1348 transposable elements reveal hazardous zones in mammalian introns.  
1349 *PLoS Comput Biol*, 7, e1002046.  
1350 ZHANG, Z. & CARMICHAEL, G. G. 2001. The fate of dsRNA in the nucleus: a  
1351 p54(nrb)-containing complex mediates the nuclear retention of  
1352 promiscuously A-to-I edited RNAs. *Cell*, 106, 465-75.  
1353

1354

1355 **FIGURES AND FIGURE LEGENDS**

1356

Figure 1

A

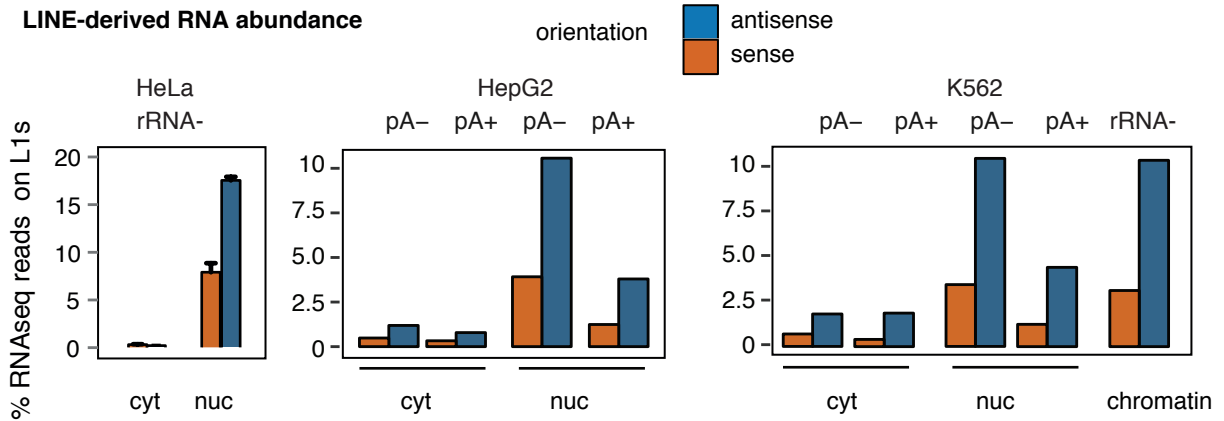

B

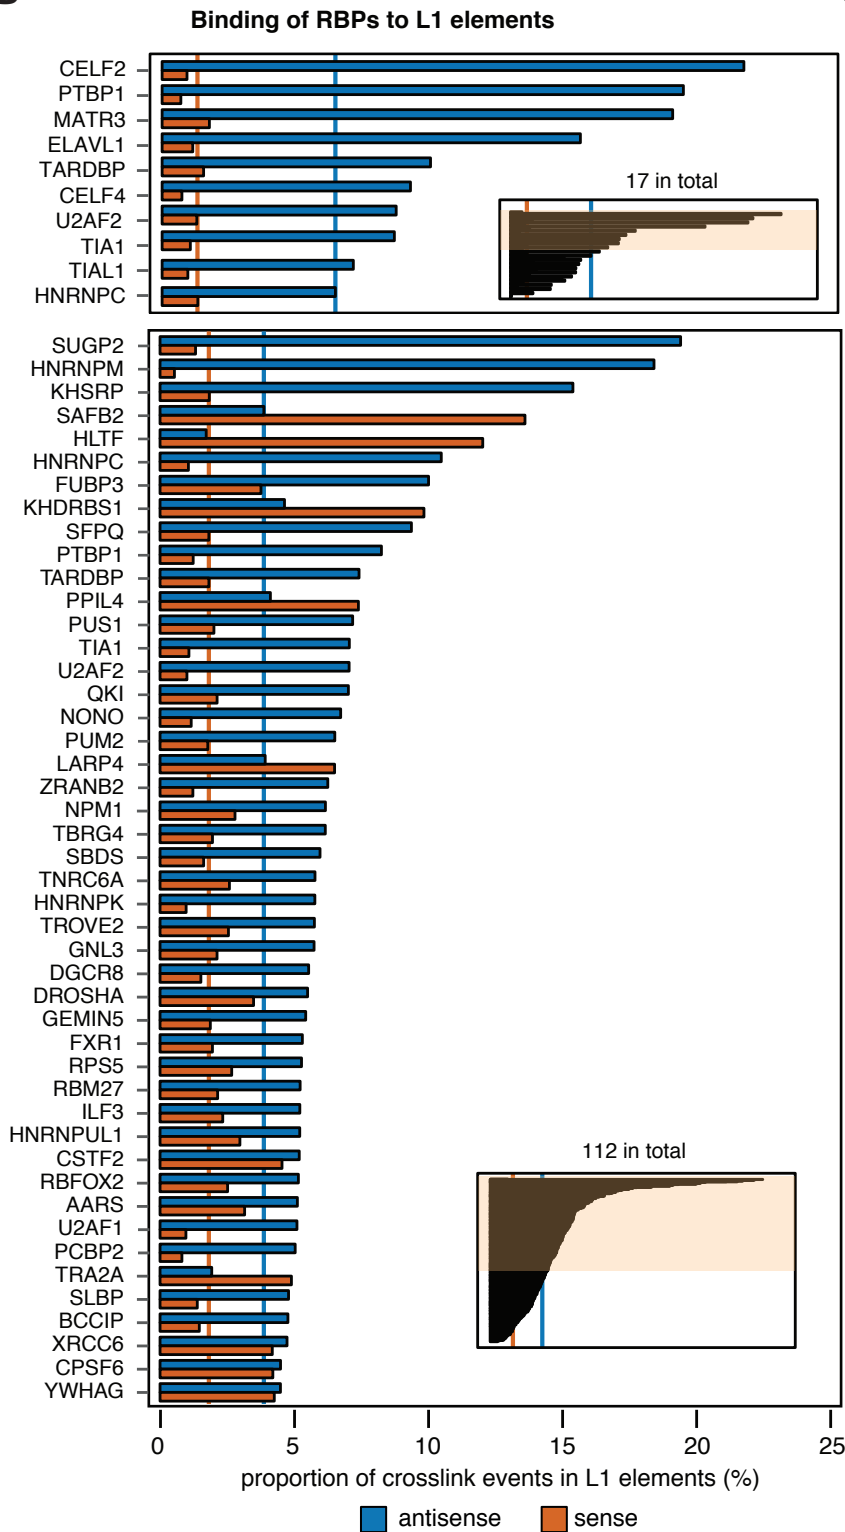

C

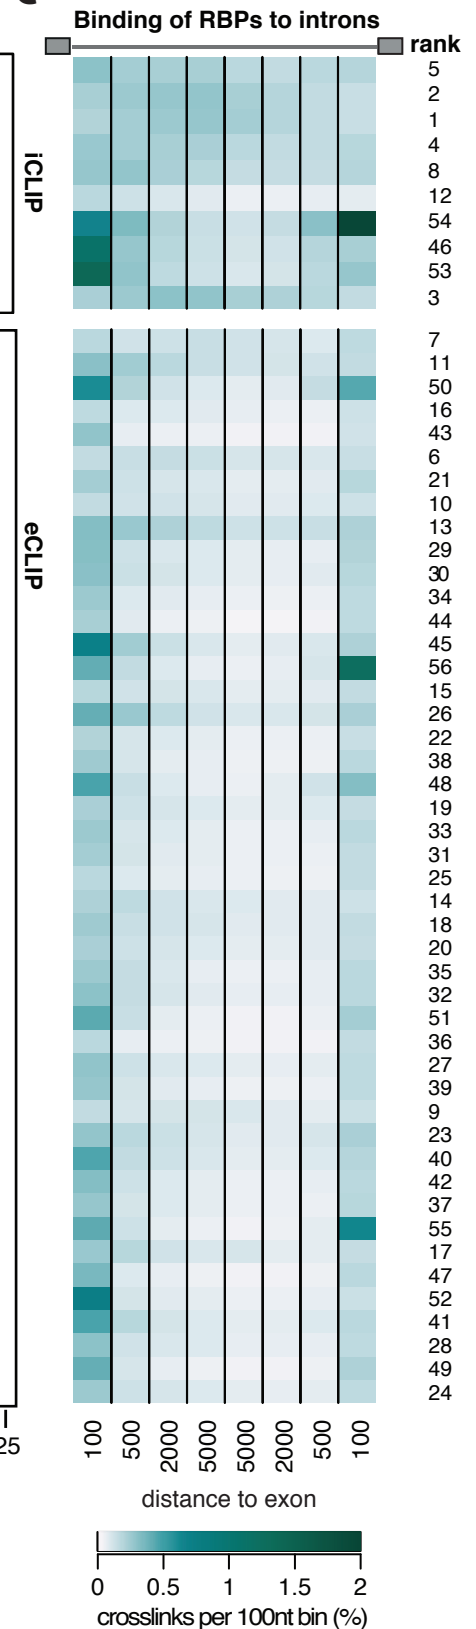

1364 **Figure 1: LINEs are binding platforms for a set of RBPs.**

1365 (A) Estimate of abundance of L1-sequences in cytoplasmic and nuclear  
1366 RNA fractions from HeLa, K562 and HepG2 cells. Strand-specific  
1367 RNAseq was used to quantify abundance of L1 in sense and  
1368 antisense (colored in orange and blue), relative to number of mapped  
1369 reads. Data is split for libraries made from polyA-, polyA+ or rRNA-  
1370 RNA. Data for K562 and HepG2 is from the ENCODE consortium.  
1371 Data for HeLa is from replicates, and bargraph show mean  $\pm$  s.d.m.

1372 (B) Frequency of L1 repeat sequences among the bound RNA sequences  
1373 of a panel of RBPs. For each RBP, all cDNAs recovered in an iCLIP  
1374 or eCLIP experiment were counted if they mapped at least partially to  
1375 a L1 element. Since e/iCLIP is strand-specific, binding to LINEs  
1376 transcribed in sense or in antisense was quantified separately,  
1377 coloured in orange and blue. The orange and blue lines indicate the  
1378 average binding across all RBPs (median). The iCLIP data was  
1379 derived either from HeLa cells or from HEK293 FlpIN cells, and the  
1380 eCLIP data from K562 and HepG2 cells. This information and the full  
1381 data set is available in Suppl. Table 1, together with the source of  
1382 each data set. For visualisation, replicates were averaged and only  
1383 data from one cell line is shown.

1384 (C) Binding to introns of at least 7kb size was analysed in 100nt bins up to  
1385 5kb upstream and downstream of the exon, and quantified in percent  
1386 relative to the total number of mapped reads. Data is shown for the  
1387 first 100nt and as an average of bins 101-500nt, 501-2000nt and  
1388 2001-5000nt. A rank for deep intronic binding is given based on the  
1389 average of the first 100nt of either splice site and average binding in  
1390 the 20001-5000nt window.

## Figure 2

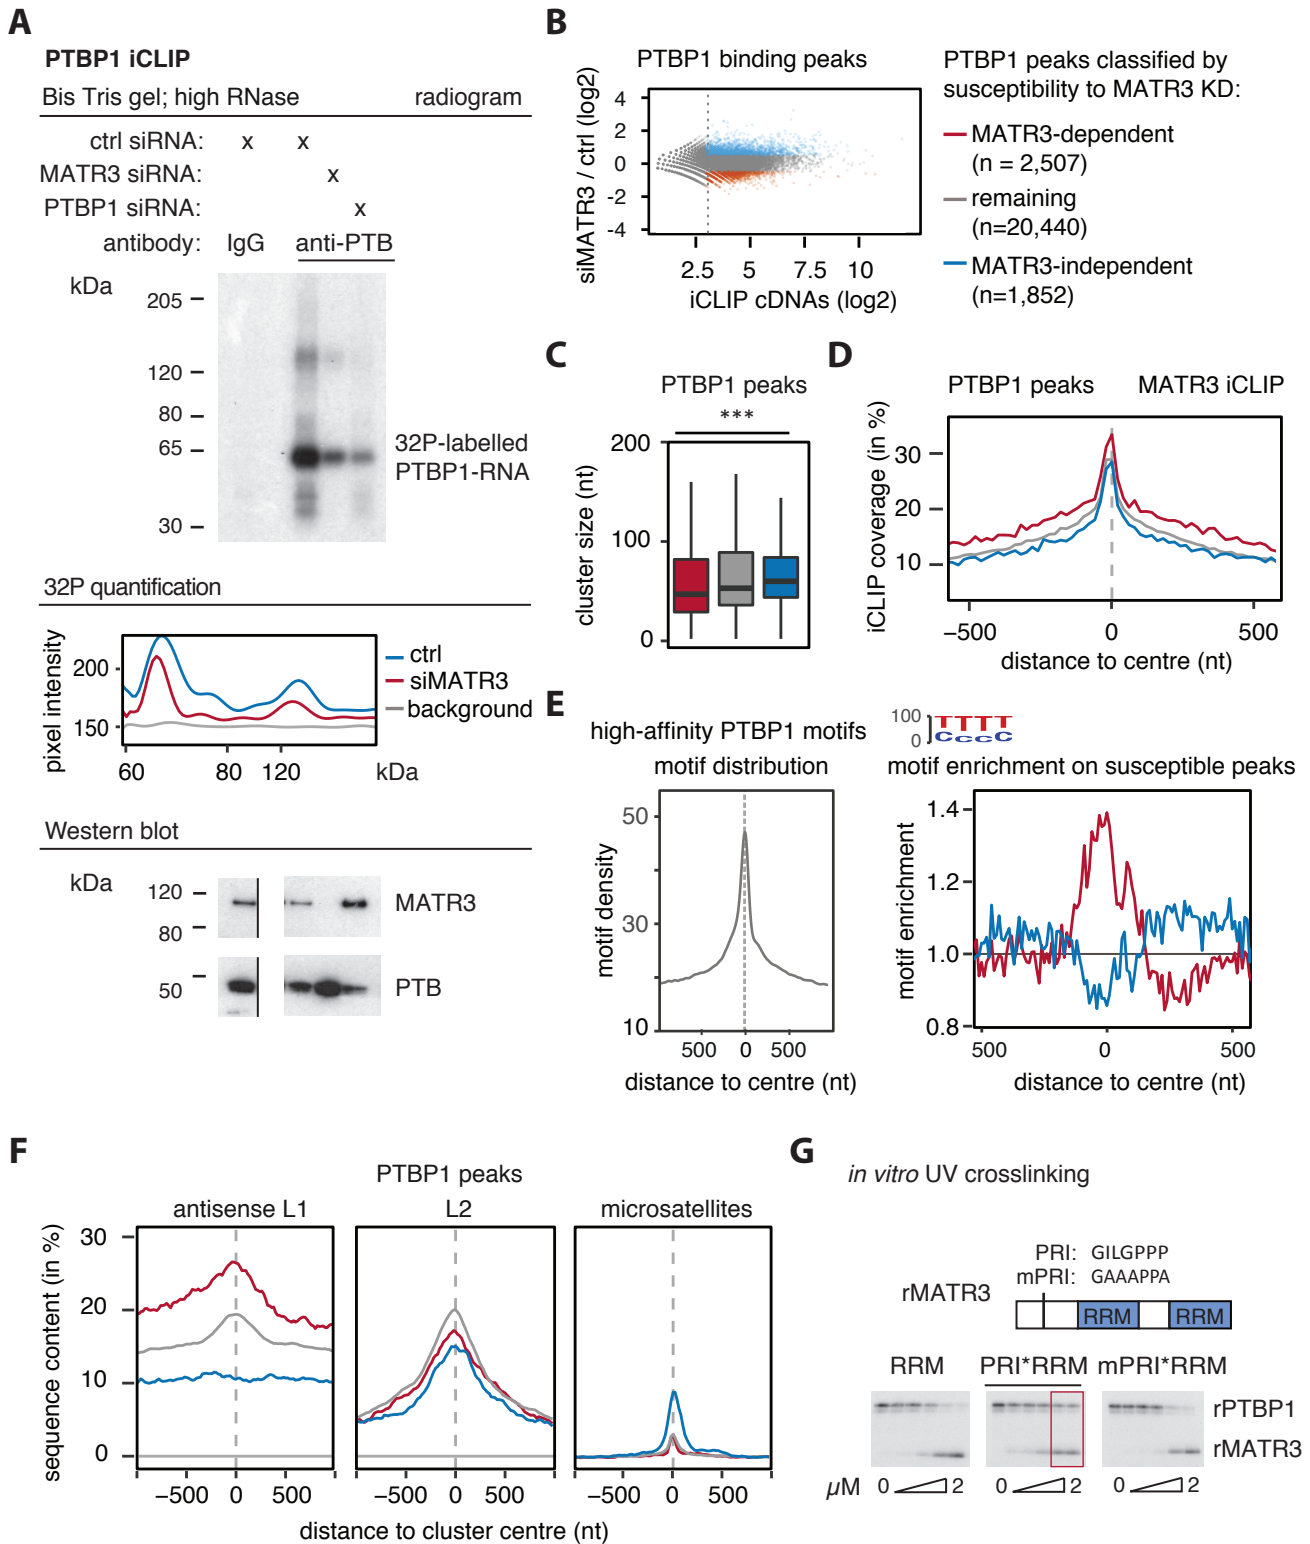

1391 **Figure 2: Binding of PTBP1 to antisense L1 elements is**  
1392 **MATR3-dependent.**

1393 PTBP1 iCLIP was performed from HEK293T cells depleted of MATR3, PTBP1  
1394 as well as controls.

1395 (A) TOP: <sup>32</sup>P labelled RNA crosslinked to and co-precipitated with PTBP1  
1396 under high RNase conditions. MIDDLE: To quantify the signal, grey  
1397 pixel intensity is shown across the centre of each lane, analysed with  
1398 ImageJ software. BOTTOM: The input lysate for the iCLIP experiment  
1399 was probed for MATR3 and PTBP1 antibodies in a Western Blot to  
1400 ensure reduced signal is not due to changes in protein abundance.  
1401 Samples are the same as in the radiogram, but the gel image was cut  
1402 to align them. Note replicates are shown in Fig. S2A.

1403 (B) PTBP1 binding peaks were identified from all iCLIP experiments, and  
1404 classified according to susceptibility to MATR3 depletion as indicated  
1405 based on moderated log<sub>2</sub> fold changes. Binding peaks with a  
1406 normalised count of less than 8 were ignored, indicated by the dotted  
1407 line.

1408 (C) PTBP1 binding peaks susceptible to MATR3 depletion are shorter  
1409 than those which are not.

1410 (D) MATR3 iCLIP is enriched around MATR3-dependent PTBP1 binding  
1411 peaks.

1412 (E) Enrichment for high-affinity motifs around PTBP1 binding peaks.  
1413 LEFT: all PTBP1 binding peaks show strong enrichment for PTBP  
1414 binding motifs. RIGHT: MATR3-dependent PTBP1 binding peaks  
1415 show enrichment in a 200nt region for high-affinity motifs above other  
1416 PTBP1 binding peaks.

1417 (F) The overlap between the centre of PTBP1 binding peaks and different  
1418 repeat classes was tested for antisense L1 elements, sense L2  
1419 elements, and sense CT-/T-rich microsatellite repeats. Metaprofile  
1420 shows percent of each class of clusters overlapping with each  
1421 genomic element. MATR3-dependent binding peaks are more  
1422 frequently derived from an antisense L1 element than MATR3-



1423 independent once.  
1424 (G) Protein-protein interaction between MATR3 and PTBP1 allows  
1425 formation of a heteromeric complex on a substrate RNA with two  
1426 ATGTT motifs *in vitro*. Recombinant PTBP1 (rPTBP1) and different  
1427 MATR3 mutants (rMATR3) were crosslinked to the same RNA at  
1428 different MATR3 molarity (rPTBP1 at 0.5 $\mu$ M).  
1429

### Figure 3

**A**

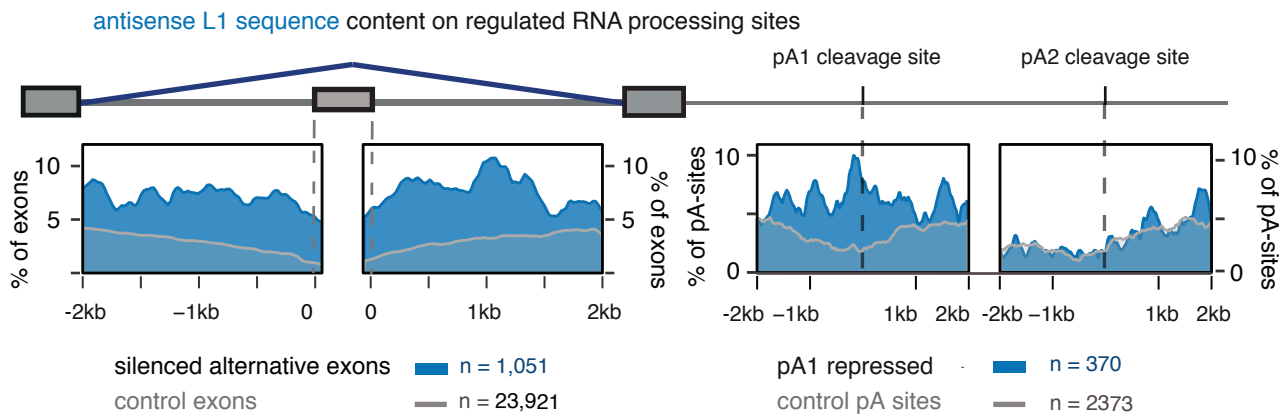

**B**

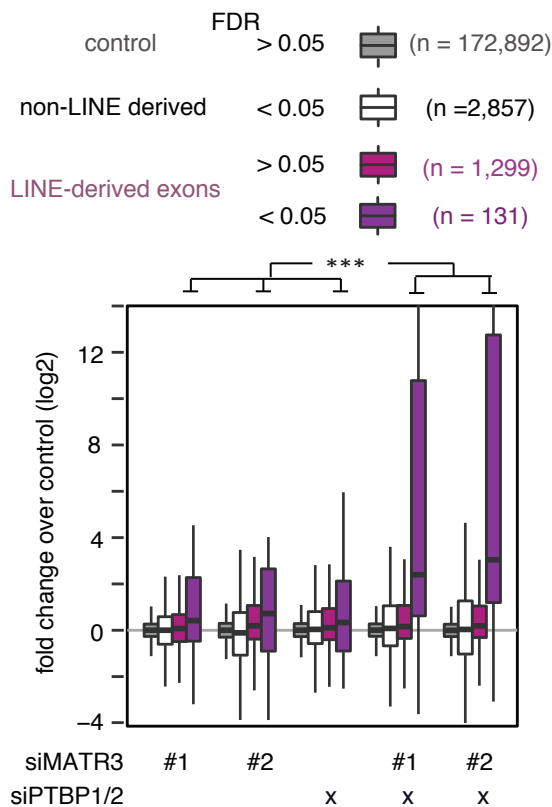

**C**

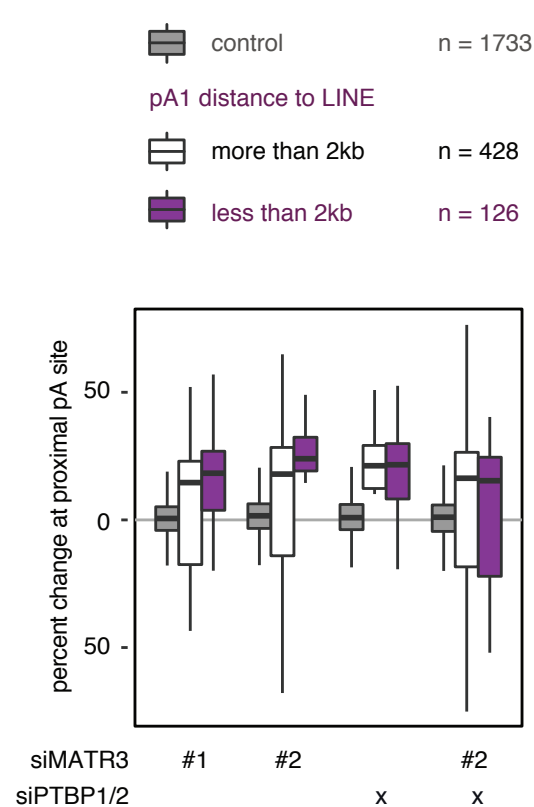

**D**

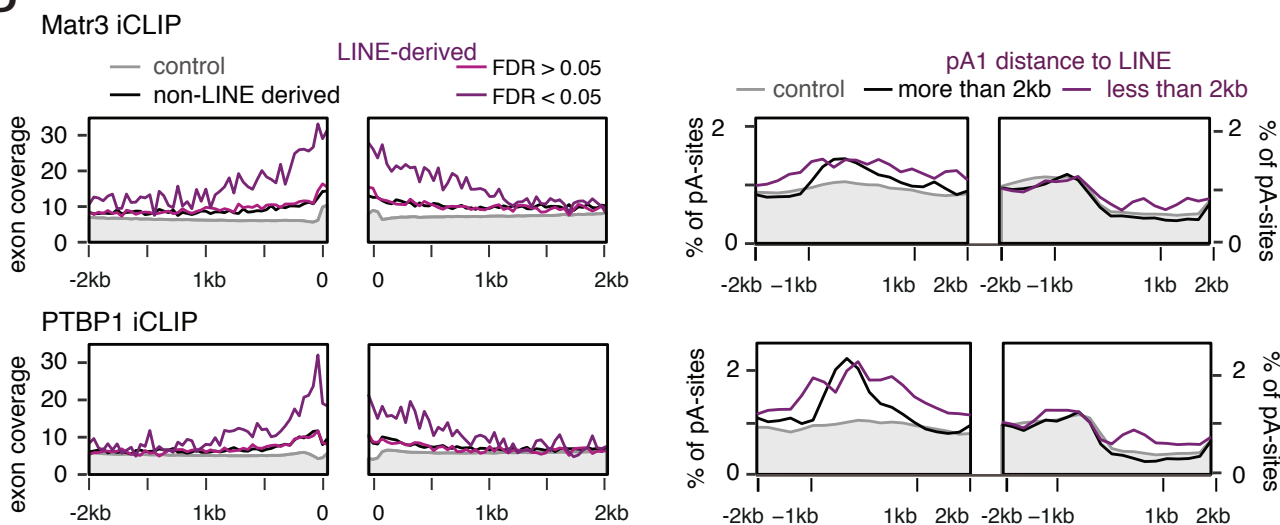

1430 **Figure 3: MATR3 and PTBP1 repress usage of cryptic splice and**  
1431 **polyA-sites in vicinity to LINEs.**

1432 (A) The metaprofile shows the coverage of antisense L1 sequences in a  
1433  $\pm 2$ kb window flanking the splice sites and the proximal and distal  
1434 polyA sites of MATR3/PTBP1/2 repressed events. Exon usage and  
1435 polyA-site usage was analysed in cells depleted of MATR3 and  
1436 PTBP1/2, individually or in combination, and events significantly  
1437 increased in absence of either proteins were selected. Misregulated  
1438 exons are alternative exons selected from a splice-array experiment  
1439 (Coelho et al., 2015), polyA site pairs are from mRNA 3'end  
1440 sequencing experiments. Controls are non-significant events site with  
1441 no appreciable change (below 10%) and reflect the expected genomic  
1442 frequency of L1 antisense sequence (shown in grey). Metaprofile was  
1443 smoothed using 40 nucleotide bins.

1444 (B) The transcriptome was *de novo* assembled from cells depleted of  
1445 MATR3 and PTBP1/2, individually or in combination, in order to  
1446 capture cryptic LINE-derived exons absent from microarrays. For  
1447 each condition, the log<sub>2</sub> fold changes of MATR3/PTBP1 regulated  
1448 exons are plotted. Only events with at least one junction-spanning  
1449 read were considered for analysis, and significant and non-significant  
1450 LINE-derived exons are shown separately (at FDR < 0.05).  
1451 Differences between the changes in exon abundance across groups  
1452 were tested by Kruskal-Wallis Rank Sum test ( $p$ -value <  $2.2e^{-16}$ ), and  
1453 pairwise comparisons within each condition were tested with a two-  
1454 sided Wilcoxon Rank Sum test, and corrected for multiple testing  
1455 according to Bonferroni. Adjusted  $p$ -value indicated by \*\*\* was below  
1456 0.0001. Whiskers are cut-off from the boxplot for visualisation, but  
1457 data distribution extends to (ymax +24) in cells depleted of MATR3  
1458 and PTBP1/2 simultaneously.

1459 (C) Percent change in usage of the proximal polyA-sites (same as in A).  
1460 Misregulated pA-sites are split into those within 2kb vicinity of a LINE  
1461 and those which are not.

1462 (D) Metaprofile of MATR3 and PTBP1 iCLIP binding across the splice and  
1463 polyA sites  $\pm 2$ kb of the regulated event. Events were selected and

1464 grouped as in (B) and (C). iCLIP binding is presented as percentage  
1465 of occupancy, and was smoothed using 40 nucleotide bins.  
1466 Occupancy on non-regulated sites is shown as control (in grey).

1467

## Figure 4

**A**

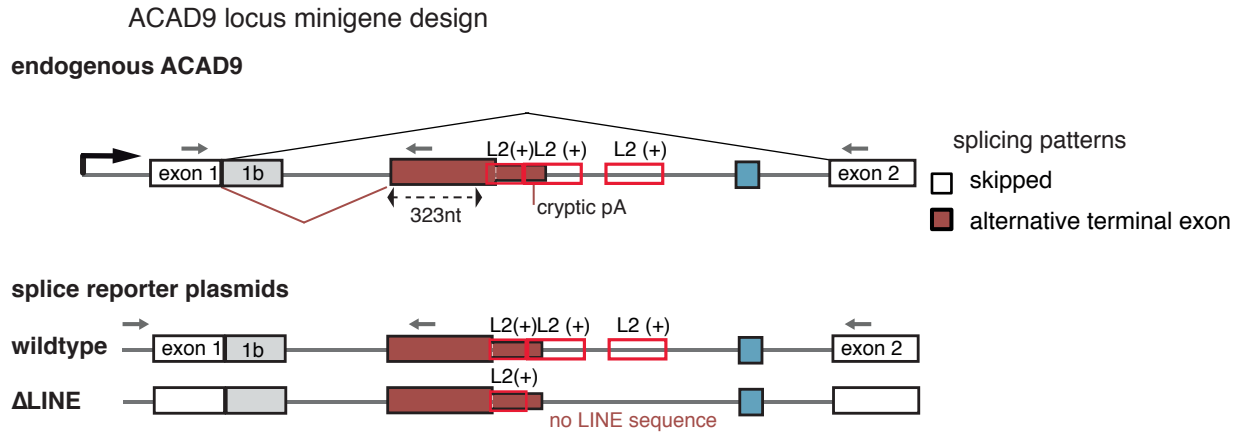

**B**

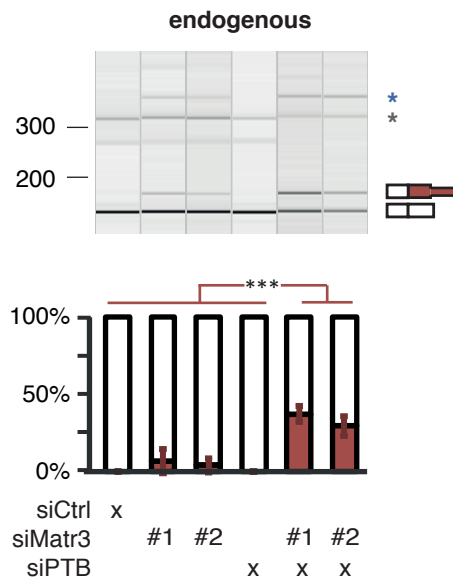

**C**

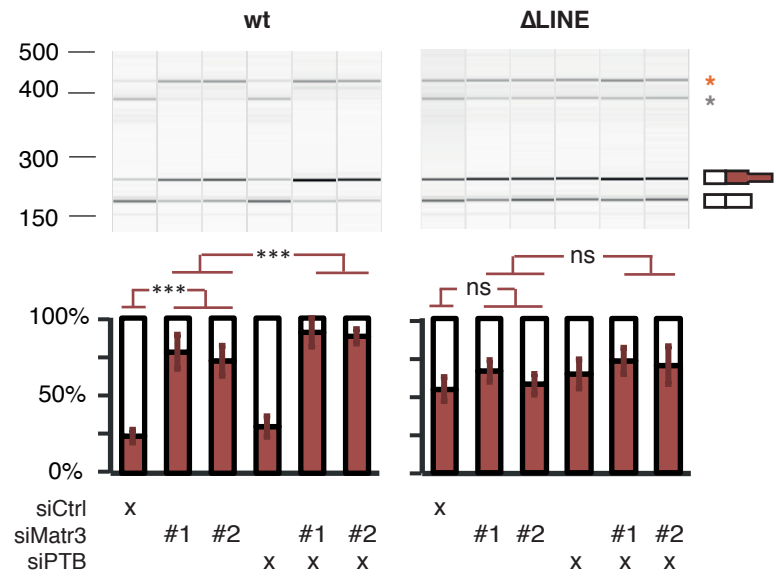

1468 **Figure 4: Partial deletion of L2 sequences disrupts splicing repression**  
1469 **of ACAD9 by MATR3/PTBP1.**

1470 (A) Schematic illustrating the endogenous ACAD9 locus and the ACAD9  
1471 splice reporter. The first two exons and the complete intron1 were  
1472 cloned into a CMV driven reporter plasmid. In the  $\Delta$ LINE splice  
1473 reporter 499 base pairs of L2 sequence were replaced by non-  
1474 repetitive sequence of intron2 of ACAD9.

1475 (B) The inclusion level of the LINE-proximal alternative terminal exon in  
1476 endogenous ACAD9 was measured in total RNA of cells depleted of  
1477 MATR3 and PTBP1/2 individually or in combination as well as  
1478 controls. To test for significance, one-way ANOVA was used coupled  
1479 with multiple comparison correction according to Tukey's HSD. \*\*\*  
1480 indicates p-value below 0.001. Semi-quantitative RT-PCR analysis is  
1481 averaged across three independent replicates, error bars represent  
1482 s.d.m.

1483 (C) The inclusion level of the LINE-derived exon was measured as in (B)  
1484 in the wild-type and  $\Delta$ LINE ACAD9 splice reporter.

1485 (B) and (C) Additional splice products are indicated by asterisks. These  
1486 use the 5' splice site of exon 1b.

1487

1488

Figure 5

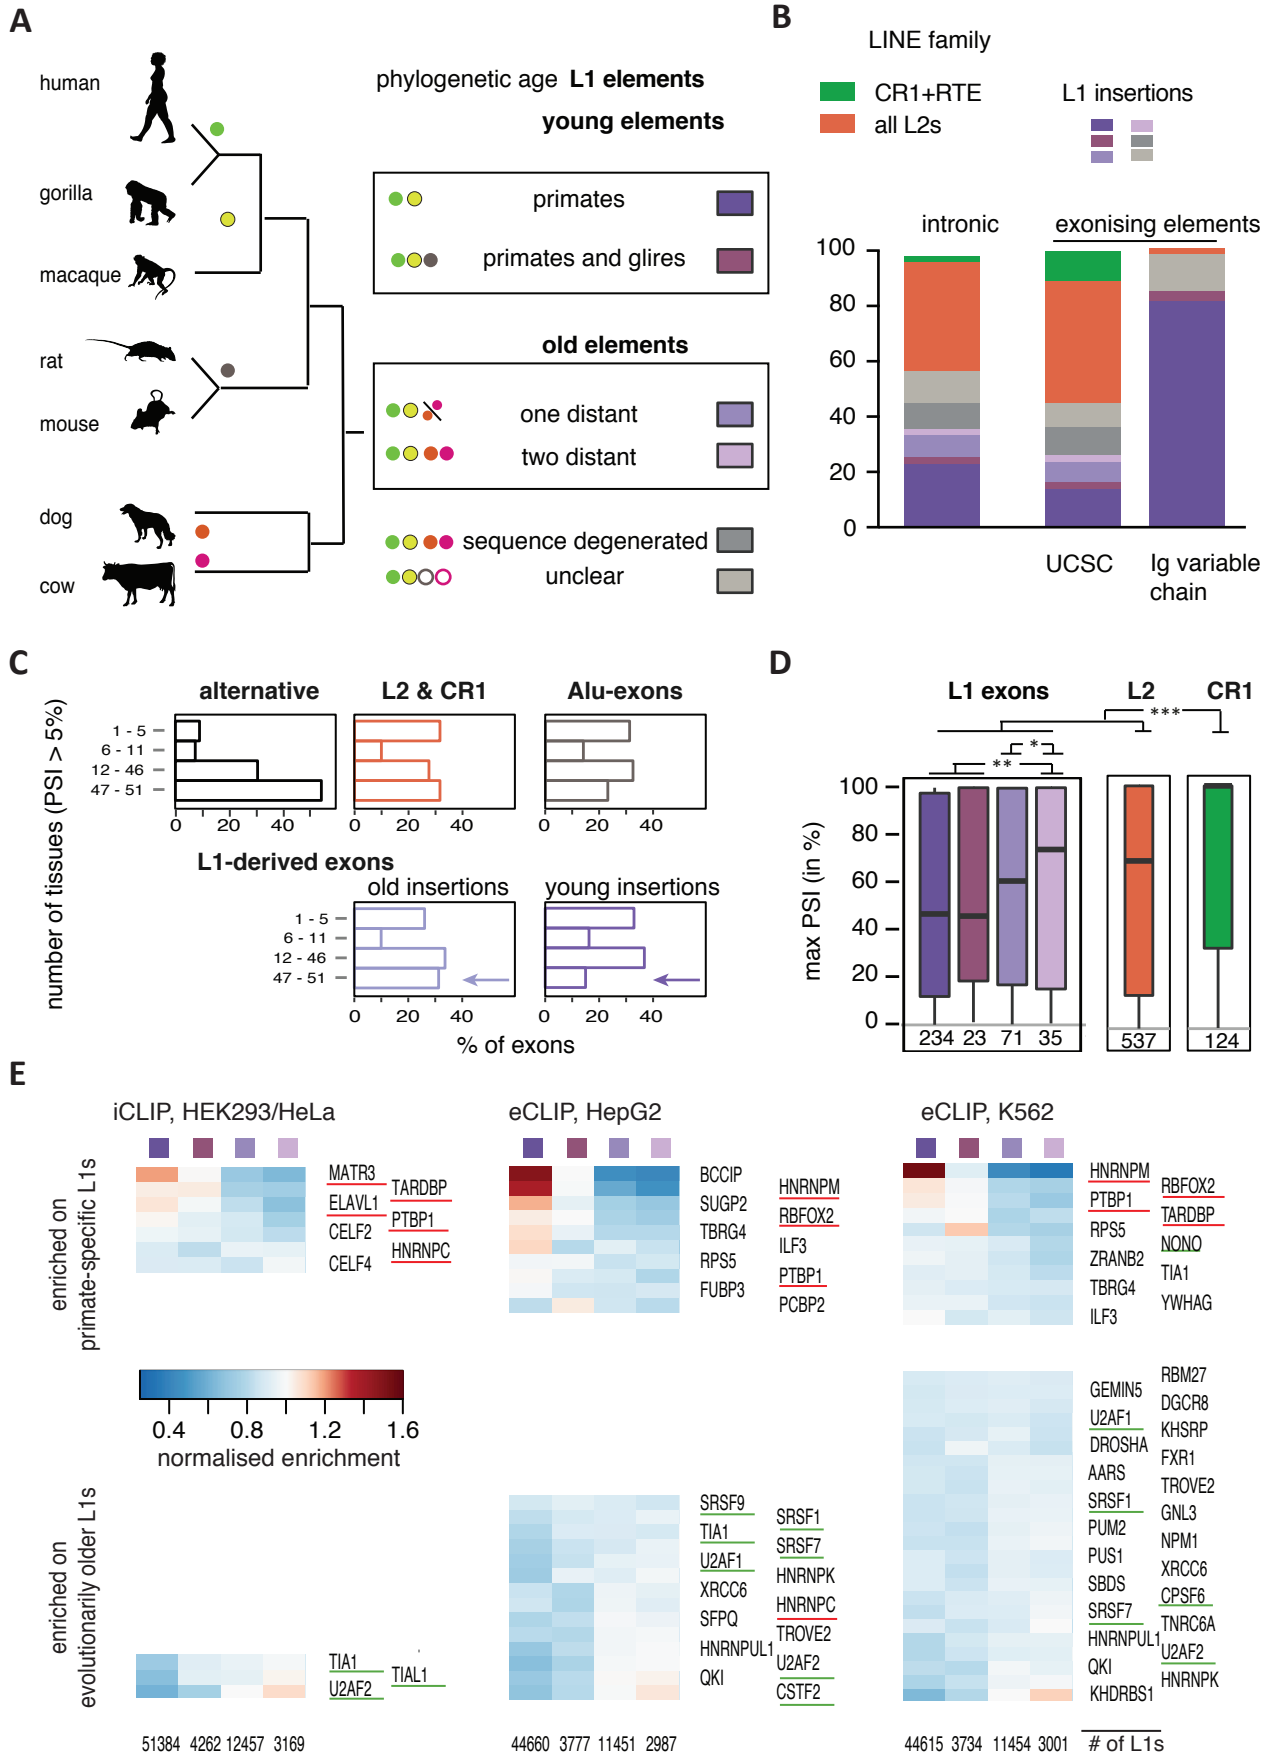

1489 **Figure 5: LINE-derived exons are a source of primate-specific alternative**  
1490 **exons.**

1491 Percent splice index (PSI) was calculated in the GTEx panel of human tissue  
1492 samples for LINE-derived exons annotated in UCSC (relative to the flanking  
1493 exons). Inclusion levels range from 0 to 100%, showing no inclusion or full  
1494 inclusion. If no support for expression of the flanking exons was found, the  
1495 gene was assumed to be non-expressed.

1496 (A) The phylogenetic age of each LINE element in the human genome  
1497 was mapped by comparison to the gorilla, rhesus macaque, mouse,  
1498 rat, dog and cow genome assemblies using UCSC liftover genome  
1499 alignments overlaid with RepeatMasker annotation (see Methods for  
1500 details). Elements specific to the primate or euarchontoglires lineage  
1501 are considered evolutionarily young elements, while elements present  
1502 in cow and dog are considered old elements.

1503 (B) The phylogenetic age of a LINE element gave an estimate of the  
1504 genomic age of each LINE-derived exon. UCSC annotated exons are  
1505 generally of the youngest elements. Within UCSC, the Ig-encoding  
1506 region (*abParts*) stands out with 1,152 out of 6,012 annotated LINE-  
1507 derived exons, which are frequently primate-specific.

1508 (C) Exons derived from evolutionarily young L1 elements are rarely  
1509 present across human tissue subtypes. We determined the number of  
1510 tissues in which each exon was detectable (at PSI > 5%) and  
1511 compared repeat-derived exons to non-repeat derived known  
1512 alternative exons.

1513 (D) Maximum inclusion in any tissue correlates with the genomic age of  
1514 L1-derived exons. Significance was tested across groups by  
1515 Kruskal-Wallis' Rank Sum test and pairwise comparisons by Dunn's  
1516 test corrected according to Holm-Šidák. \*, \*\* and \*\*\* indicate adjusted  
1517 p-value was below 0.05, 0.01 and 0.001, respectively.

1518 (E) RBPs show preferences for binding to L1 elements of different  
1519 evolutionary ages. The L1 elements with 10% highest coverage  
1520 across any i/eCLIP data were used to calculate a normalised



1521 coverage for each RBP, and the number of L1 elements in each group  
1522 is given at the bottom. Binding of each RBP was normalised by the  
1523 sum of all RBPs within each cell line on an individual L1 element to  
1524 obtain a relative binding estimate, and for visualisation of binding  
1525 preference, normalised enrichment of each RBP was calculated by  
1526 normalising to the mean.

1527

1528

**Figure 6**

**A**

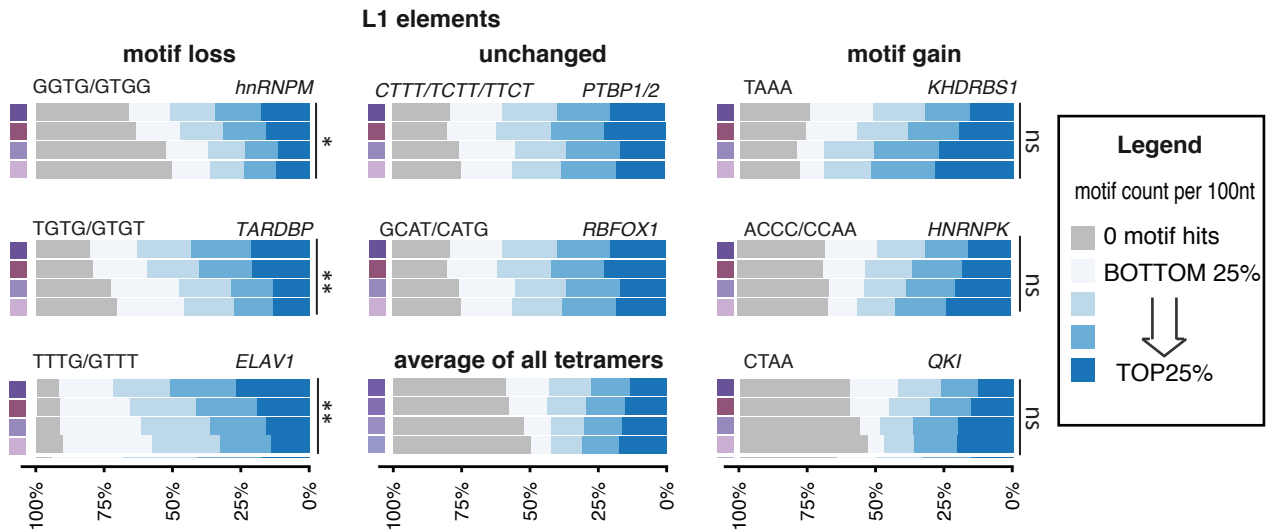

**B**

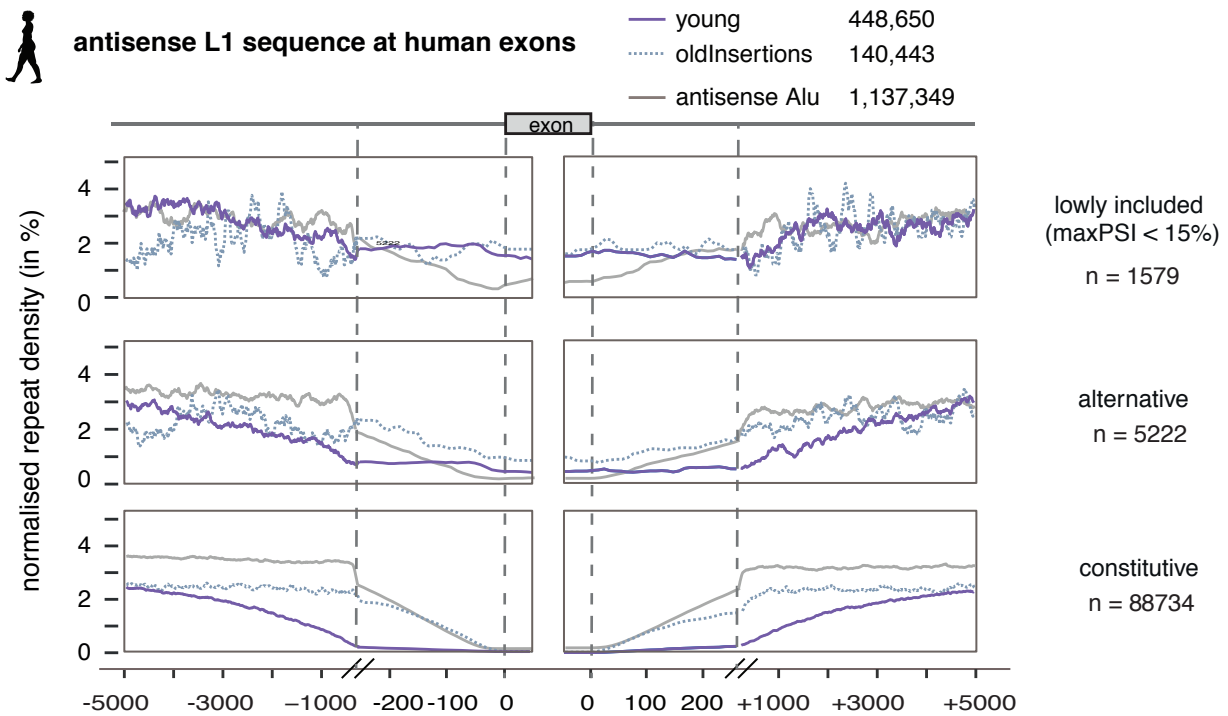

**C**

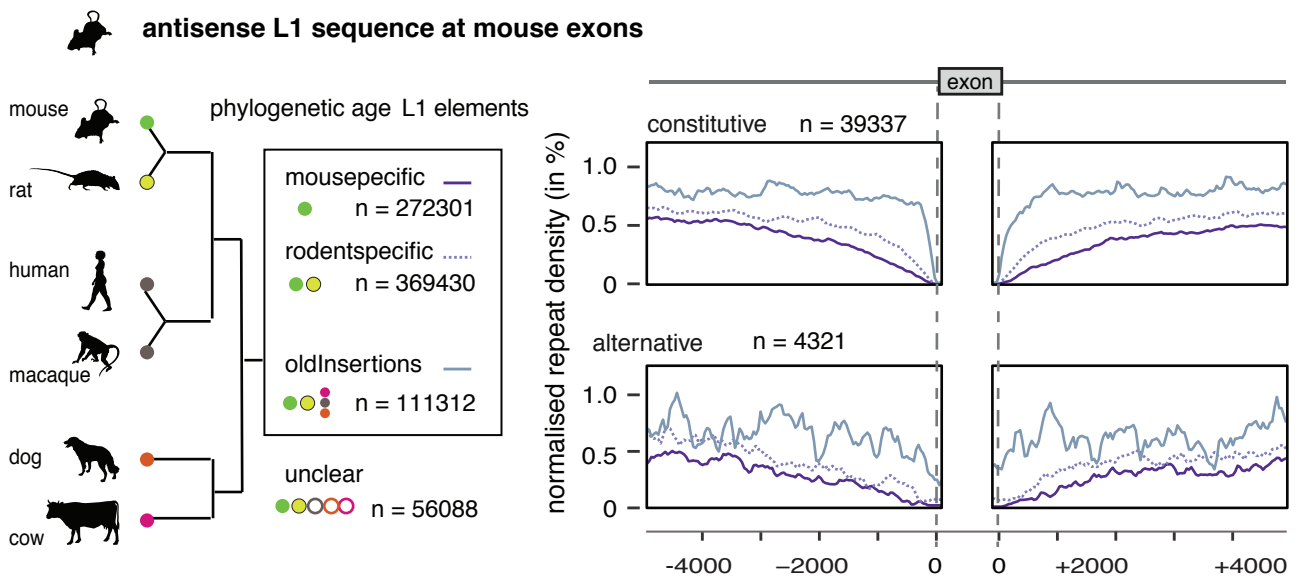

1529 **Figure 6: Young L1 elements are rich in splice repressor binding motifs**  
1530 **and selected against at exons in a broad window.**

1531 (A) The number of binding motifs associated with different RBPs is shown  
1532 for antisense L1 sequences of different genomic age. Binding motifs  
1533 of RBPs shown in Figure 5E were identified from literature where  
1534 possible and searched for in antisense L1 elements. The genomic age  
1535 of L1 elements is defined as in Figure 5A. Total motif count per 100nt  
1536 was determined and categorised as quartiles (bottom to top 25% and  
1537 0 motifs, see legend). For comparison, the average distribution of all  
1538 possible tetramers is shown. Changes in motifs counts with  
1539 evolutionary age of the elements were considered significant based  
1540 on their empirical distribution (see Methods for details)., \*\* and \*  
1541 indicates FDR below 0.05 and 0.1, respectively; ns = not significant.

1542 (B) Density profiles showing L1 antisense sequence 5kb upstream and  
1543 downstream of human exons. L1s were split for evolutionary young  
1544 and old insertions and repeat density is normalised to the total  
1545 number of repeats in the two groups. For comparison, the primate-  
1546 specific Alu insertions are shown. Exons were grouped by inclusion in  
1547 human tissues from GTEx data into those which are more than 5%  
1548 but less than 15% included in any tissue, those which are alternative  
1549 and those which are constitutively included. To better present the  
1550 repeat density around the splice sites, the x axis is cut at 250 nt to  
1551 show a zoom-in of the 250nt flanking the exons.

1552 (C) Density profiles showing L1 antisense sequence 5kb upstream and  
1553 downstream of constitutive and alternative exons in the mouse. The  
1554 genomic age of each L1 element in the mouse genome was mapped  
1555 by comparison to the rat, rhesus macaque, human, dog and cow  
1556 genome assemblies (see Methods for details).

1557

Figure 7

Young LINEs recruit repressive RBPs to insulate the LINE and surrounding RNA

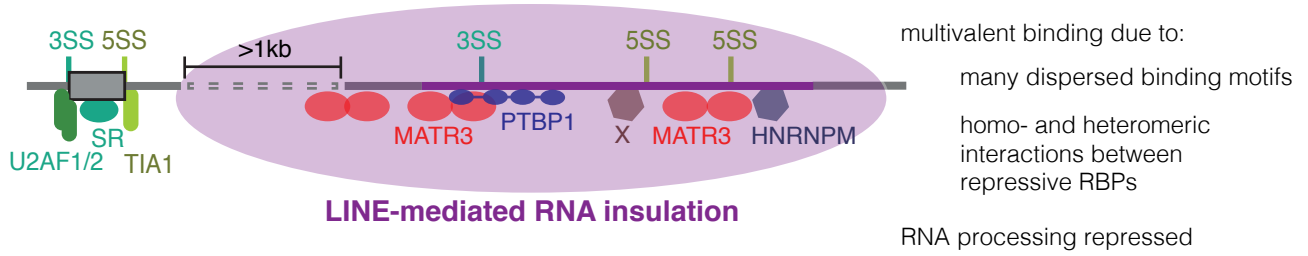

old LINEs are less repressed, and are a more common source of tissue-specific exons

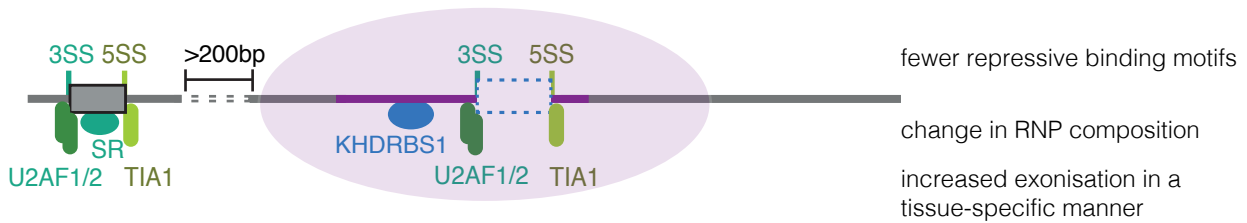

1558 **Figure 7: LINE elements create a splice repressive zone that prevents**  
1559 **cryptic exonisation events**

1560 Consensus L1 elements are known to contain strong splice sites, but  
1561 exonisation is rare and generally we observed exons from elements that are  
1562 evolutionarily old. Evolutionarily young L1 insertions recruit a number of splice  
1563 repressive proteins, including MATR3, PTBP1 and hnRNPM, as well as RBPs  
1564 of yet unknown function (indicated as an X; but candidates are for instance  
1565 BCCIP and SUGP2, see Figure 5C). These proteins recognise RNA motifs  
1566 present within the L1 elements, which are diminished within evolutionary older  
1567 L1s. The extent of splice-repressive proteins assembling on the L1s leads to  
1568 selective pressure against young L1 insertions in a large proximity window of  
1569 non-repeat derived exons. Hence evolutionary young LINEs insulate intronic  
1570 regions from RNA processing. Evolutionarily older elements have a high  
1571 probability of loosing binding sites of repressive RBPs. Hence, their  
1572 exonisation is more common, but still largely tissue-specific.

1573

1574

- 1568 **List of Supplementary files and Tables.**
- 1569 **Figure S1. Related to Figure 1: Extended data for LINEs are binding**  
1570 **platforms for a set of RBPs.**
- 1571 **Figure S2. Related to Figure 2: Combinatorial binding of MATR3 and**  
1572 **PTBP1 to the same LINEs.**
- 1573 **Figure S3. Related to Figure 3: MATR3/PTBP1 repressed exons are**  
1574 **frequently derived from LINEs or proximal to LINEs.**
- 1575 **Figure S4. Related to Figure 4: Nonsense-mediated decay triggered by**  
1576 **LINE-derived exons and depletion of ACAD9 expression following**  
1577 **inclusion of a LINE-proximal exon.**
- 1578 **Figure S5. Related to Figure 5: MATR3 and PTBP2 binds to mouse-**  
1579 **specific L1 insertions and PTBP2 represses LINE-derived exon inclusion**  
1580 **in the mouse brain.**
- 1581 **Figure S6. Related to Figure 5: L1-derived exons are a source of primate-**  
1582 **specific alternative exons with high tissue-specific variability.**
- 1583 **Suppl. Table 1: Sources and references for iCLIP, eCLIP and RNAseq**  
1584 **data used in this study and RBP binding motifs identified from literature.**
- 1585 **Suppl. Table 2: Quantification of L1 and L2 sequences in iCLIP and**  
1586 **eCLIP.**
- 1587 **Suppl. Table 3: Summary statistics of cryptic exon annotation from**  
1588 **interleaving UCSC or ENSEMBL annotation and Cufflinks assembly.**
- 1589 **Suppl. Table 4: Summary statistics of mRNA 3- end sequencing**  
1590 **experiments.**
- 1591 **Suppl. Table 5: Annotation derived from phylogenetic tracing of LINE**  
1592 **elements in hg19.**
- 1593 **Suppl. Table 6: Inclusion levels of 43583 UCSC annotated exons in 53**  
1594 **human tissue types.**
- 1595 **Suppl. Table 7: Summary statistics of tetramer frequencies in antisense**  
1596 **L1 sequences.**

Figure S1. Related to Figure 1

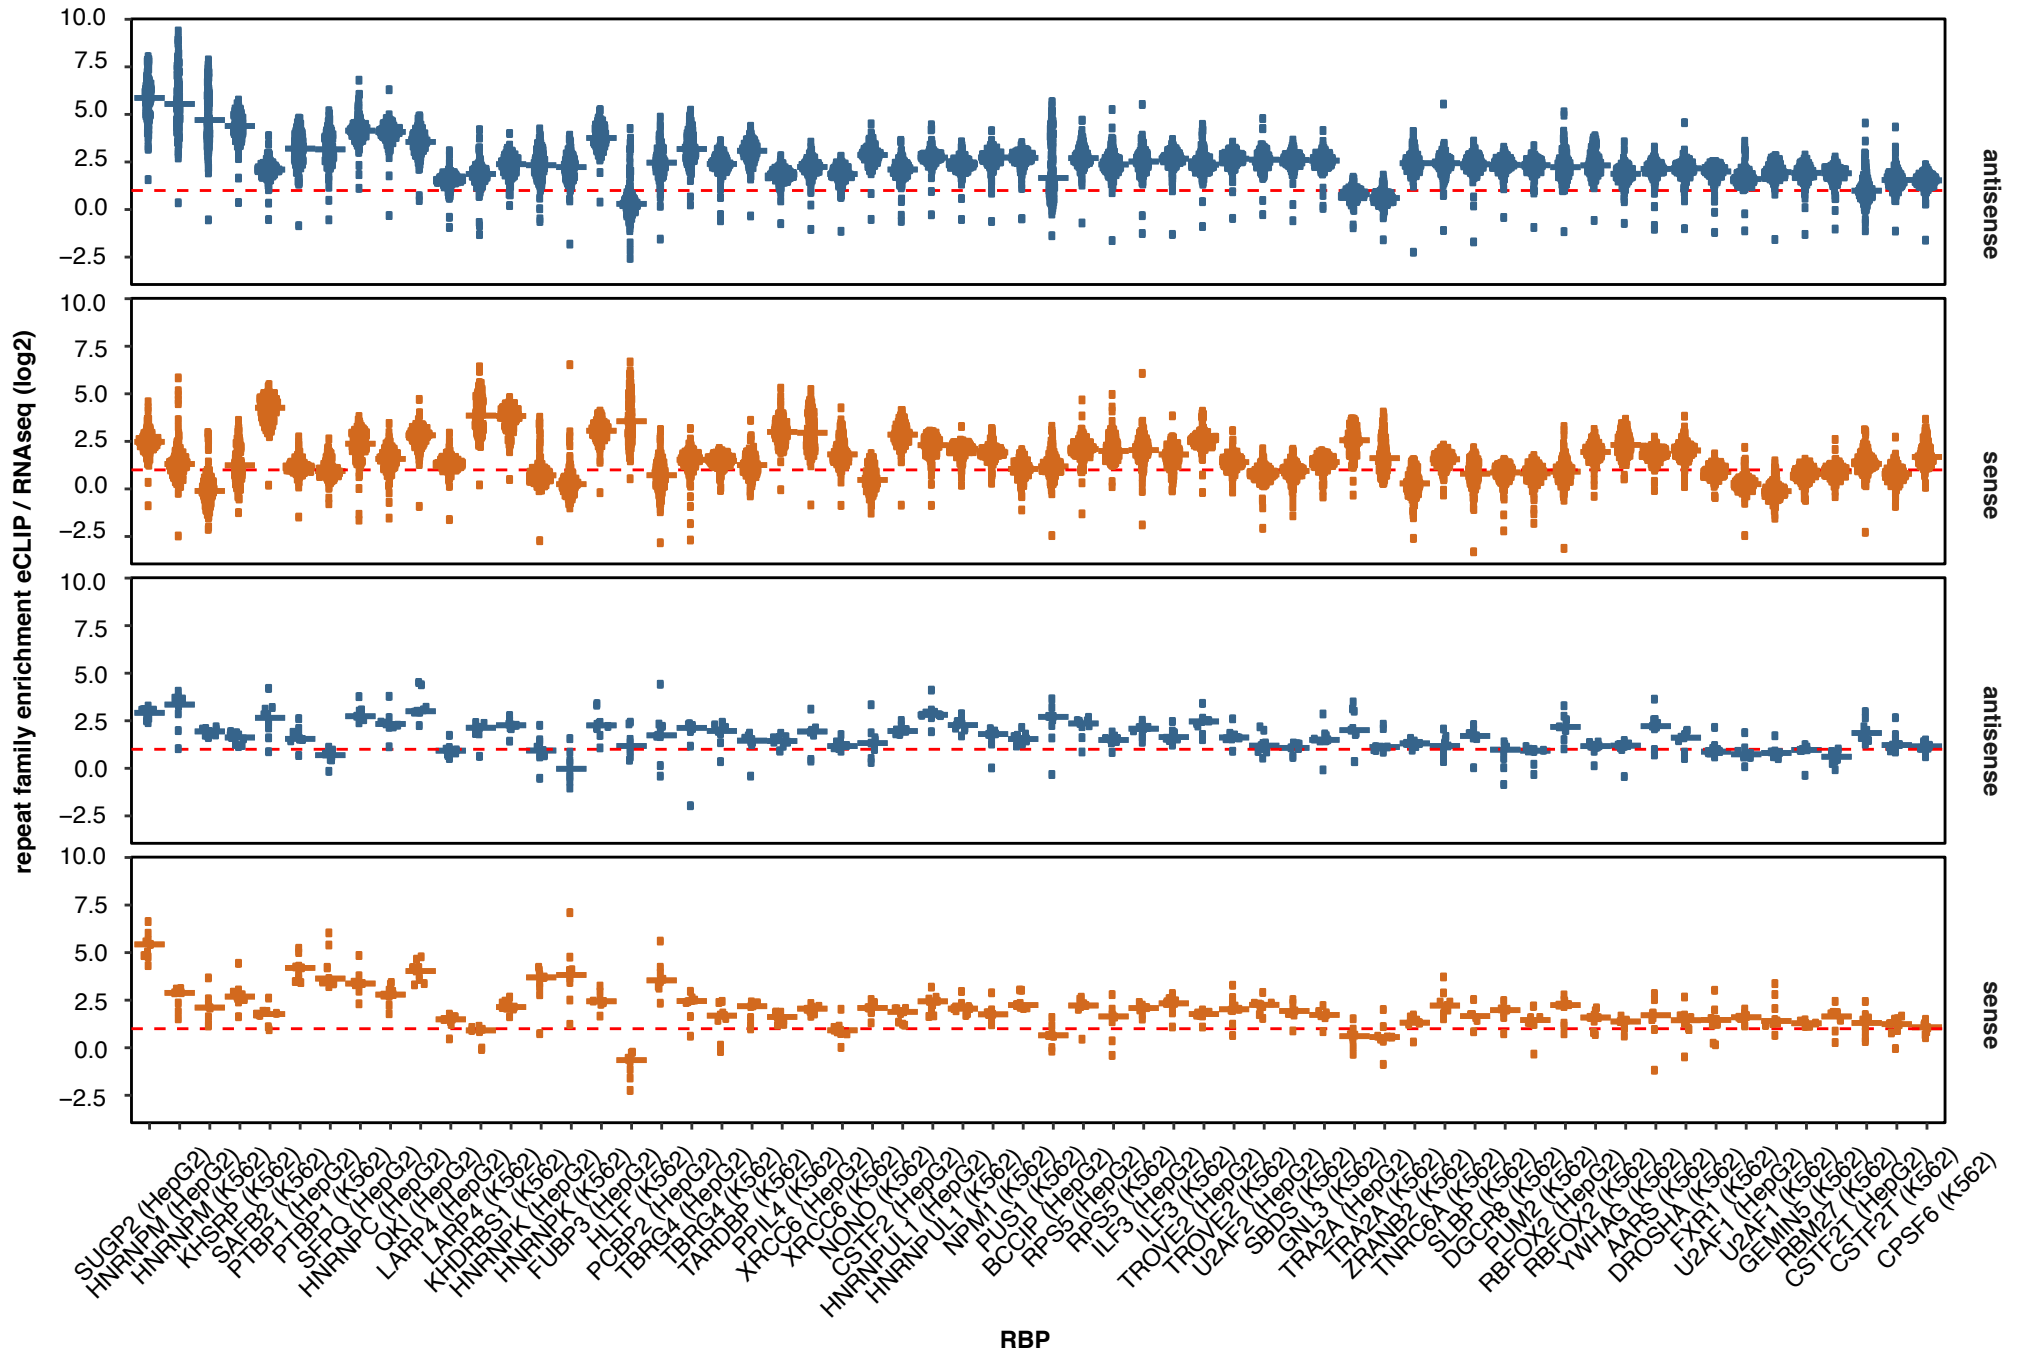

1606 **Figure S1. Related to Figure 1: Extended data for LINEs are binding**  
1607 **platforms for a set of RBPs.**

1608 (A) Tetrascript (Jin et al., 2015) was used to estimate the enrichment of  
1609 each subfamily of L1 and L2 repeats among the bound RNA  
1610 sequences of a panel of RBPs, comparing the abundance in  
1611 recovered eCLIP tags to the abundance in RNAseq reads. For each  
1612 RBP, all 142 L1/L2 subfamilies (132 for L1, 10 for L2) were  
1613 considered. Since eCLIP is strand-specific, binding to LINEs  
1614 transcribed in sense or in antisense were quantified separately,  
1615 coloured in red and blue. The cell lines used in each eCLIP  
1616 experiment are indicated on the bottom.

1617

1618

1619



## Figure S2. Related to Figure 2

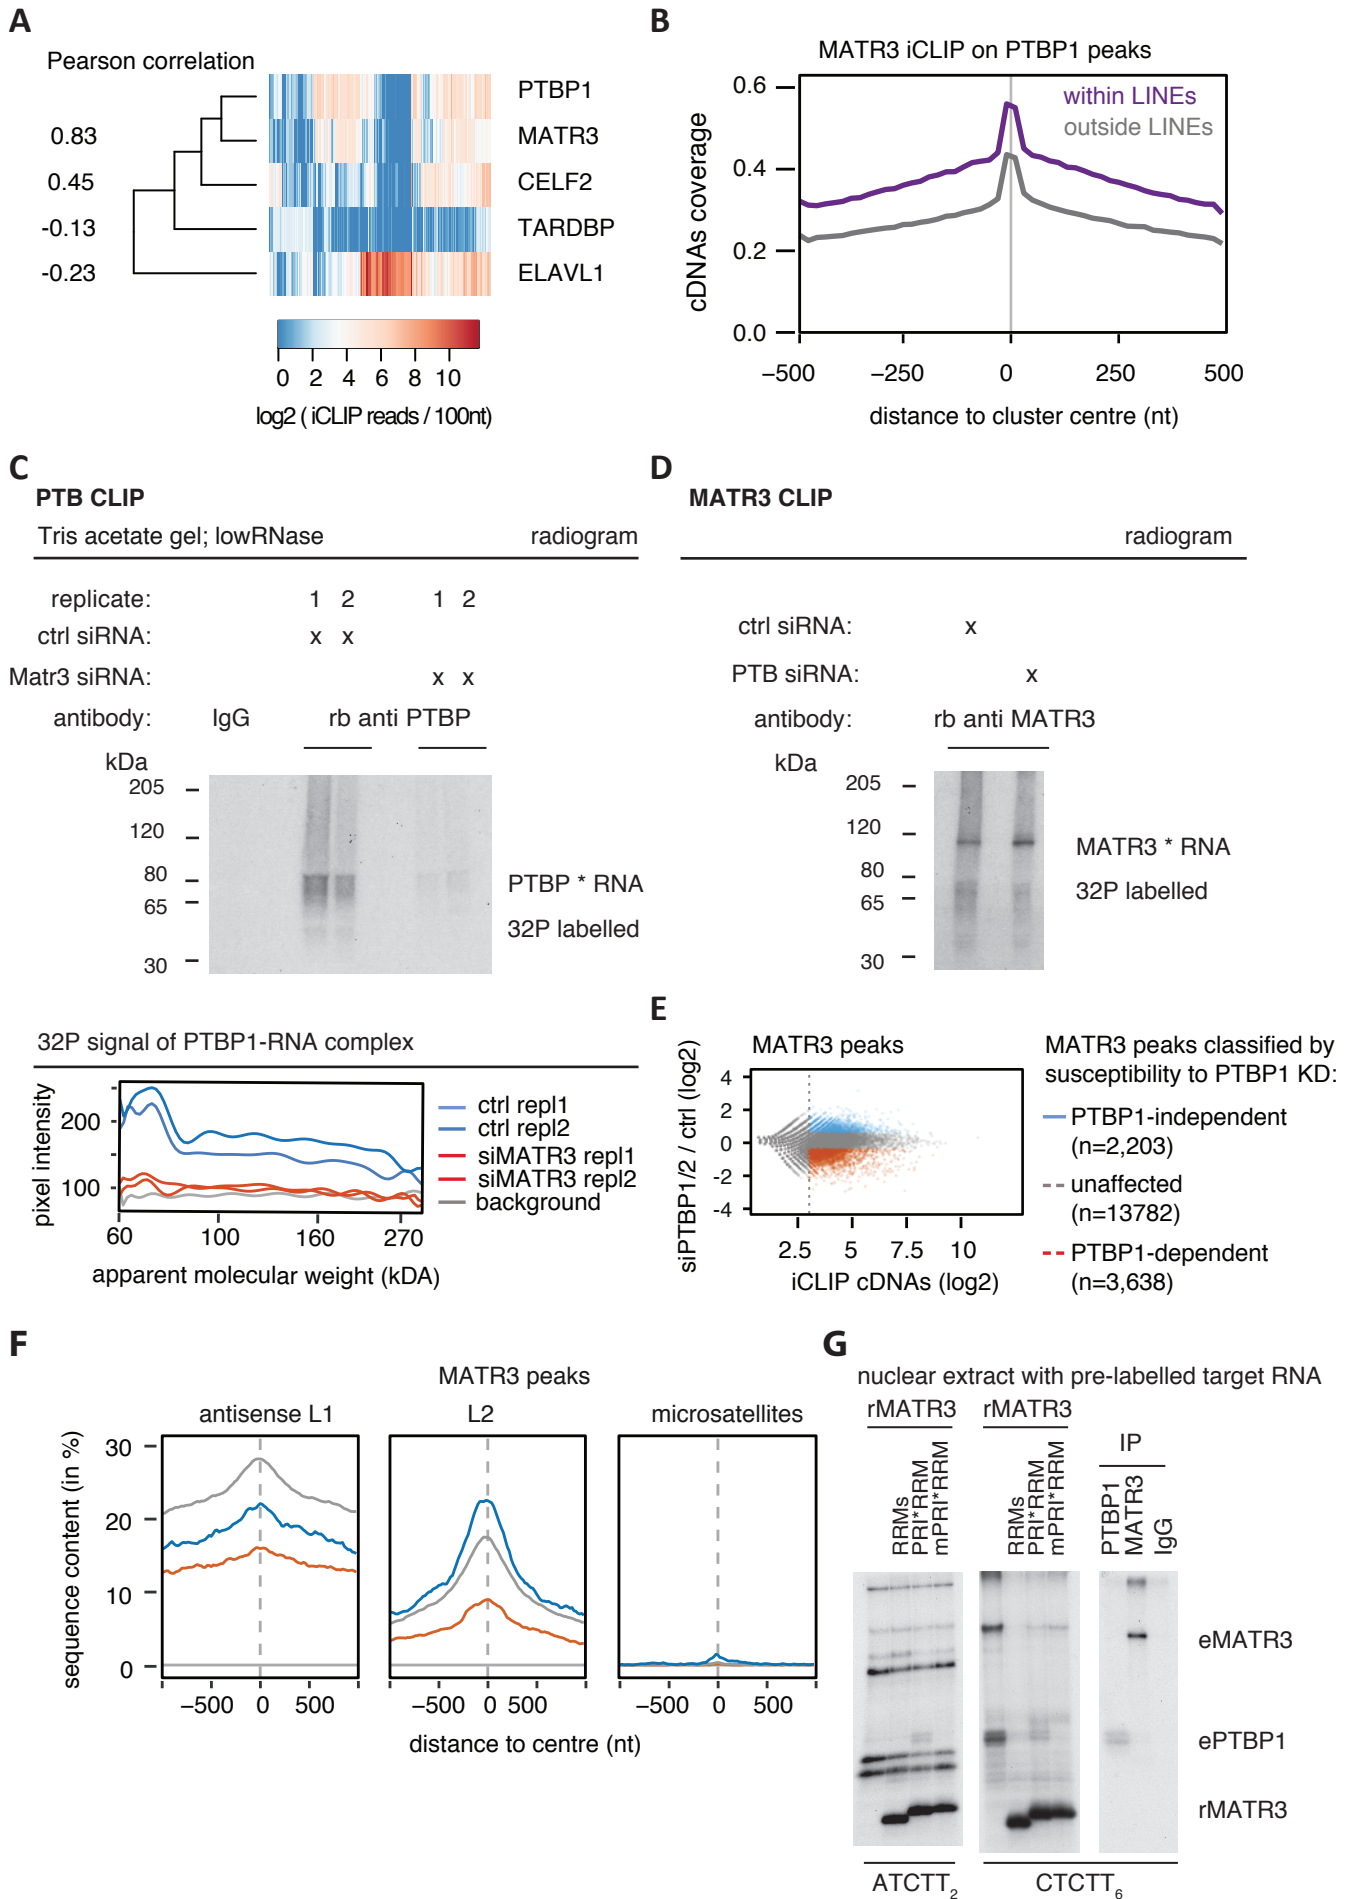

1620 **Figure S2. Related to Figure 2: Combinatorial binding of MATR3 and**  
1621 **PTBP1 to the same LINEs.**

1622 (A) For each RBP that showed considerable binding to LINE repeats in  
1623 iCLIP (see B), we selected the 50 LINE repeats with strongest  
1624 coverage (cDNAs per 100nt). For comparison we included TDP43,  
1625 which showed little binding to LINE repeats. All iCLIP data selected  
1626 was collected from HEK293 cells. The heatmap shows comparison of  
1627 binding strength at this set of 214 LINE repeats, and the nearest  
1628 neighbour analysis for each RBP. The values left to the dendrogram  
1629 show the pearson correlation coefficient between all RBPs and  
1630 PTBP1. Only LINEs with a minimal length of 50nt were considered to  
1631 reduce the bias to short, highly expressed LINE repeats.

1632 (B) Metaprofile of iCLIP binding for MATR3 around iCLIP binding peaks of  
1633 Celf2, Celf4, TDP43, HuR and PTBP1 within and outside of LINE  
1634 repeats. The data was smoothed with 20nt bins.

1635 (C) HEK293T cells were transfected with siRNAs targeting MATR3,  
1636 PTBP1 or scrambled controls, and 72 hours later labelled with 100 $\mu$ M  
1637 4SU for 8 hours and cross-linked with 365nm UV light. The radiogram  
1638 shows  $^{32}$ P labelled RNA crosslinked to and co-precipitated with  
1639 PTBP1. Before immunoprecipitation, protein concentration was  
1640 measured and equalised. The PTBP1 iCLIP was done under low  
1641 RNase conditions (compare with Fig. 2A for high RNase condition).  
1642 Replicate 1 and 2 are independent biological replicates processed in  
1643 parallel.

1644 (D)  $^{32}$ P labelled RNA crosslinked to and co-precipitated with MATR3  
1645 under equivalent conditions as in (C). The MATR3 iCLIP shown was  
1646 done under high RNase conditions.

1647 (E) MATR3 binding peaks were identified from iCLIP experiments, and  
1648 classified according to susceptibility to PTBP1 depletion as indicated  
1649 based on moderated log<sub>2</sub> fold change. Binding peaks with a  
1650 normalised count of less than 8 were ignored, as indicated by the  
1651 dotted line.

1652 (F) The overlap between the centre of MATR3 binding peaks and different

1653 repeat classes was tested for antisense L1 elements, sense L2  
1654 elements, and sense CT-/T-rich microsatellite repeats. Metaprofile  
1655 shows percent of each class of clusters overlapping with each  
1656 genomic element.

1657 (G) Protein-protein interaction between MATR3 and PTBP1 allows  
1658 recruitment of PTBP1 to a MATR3 bound RNA *in vitro*. Recombinant  
1659 MATR3 mutants (rMATR3) and <sup>32</sup>P labelled RNA probes were added  
1660 to nuclear extracts from HeLa cells and UV-crosslinked. RNA  
1661 substrates contained either two MATR3 or six PTBP1 RNA compete  
1662 motifs motifs (ATCTT<sub>2</sub> and CTCTT<sub>6</sub>). Crosslinking signals  
1663 corresponding to endogenous PTBP1 (ePTBP1) and MATR3  
1664 (eMATR3) were confirmed by immunoprecipitation.

1665

Figure S3 Related to Figure 3

**A**

sense L2 sequence content

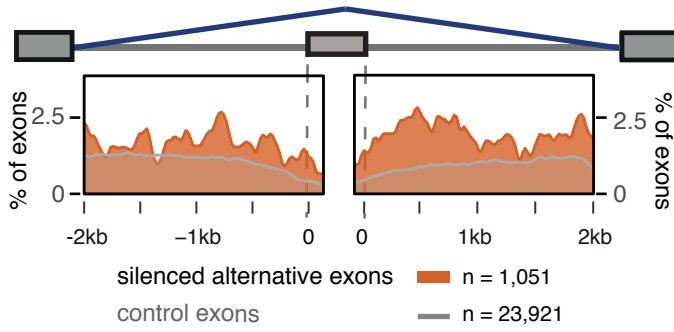

**B**

antisense L1 sequence - excluding LINE-derived exons

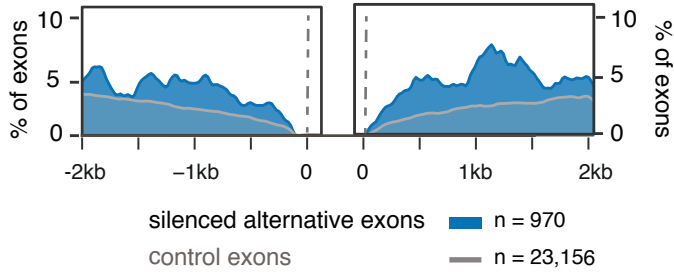

**C**

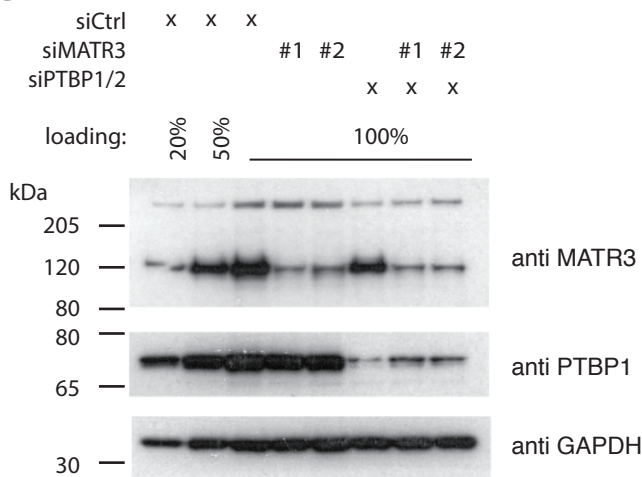

**D**

LINE-derived 3' and 5' splice sites

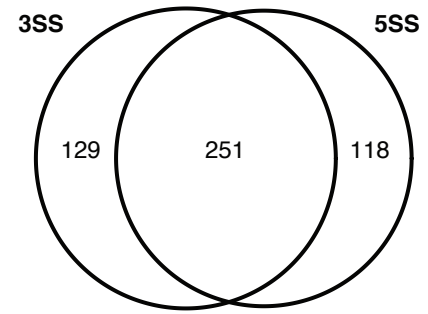

**E**

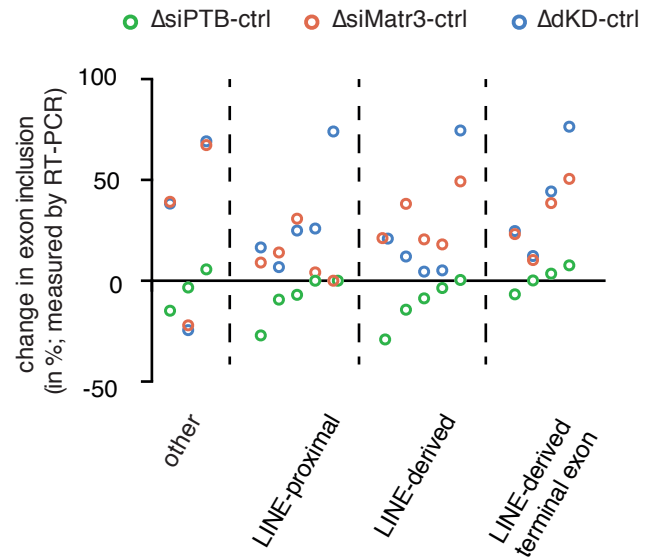

**F**

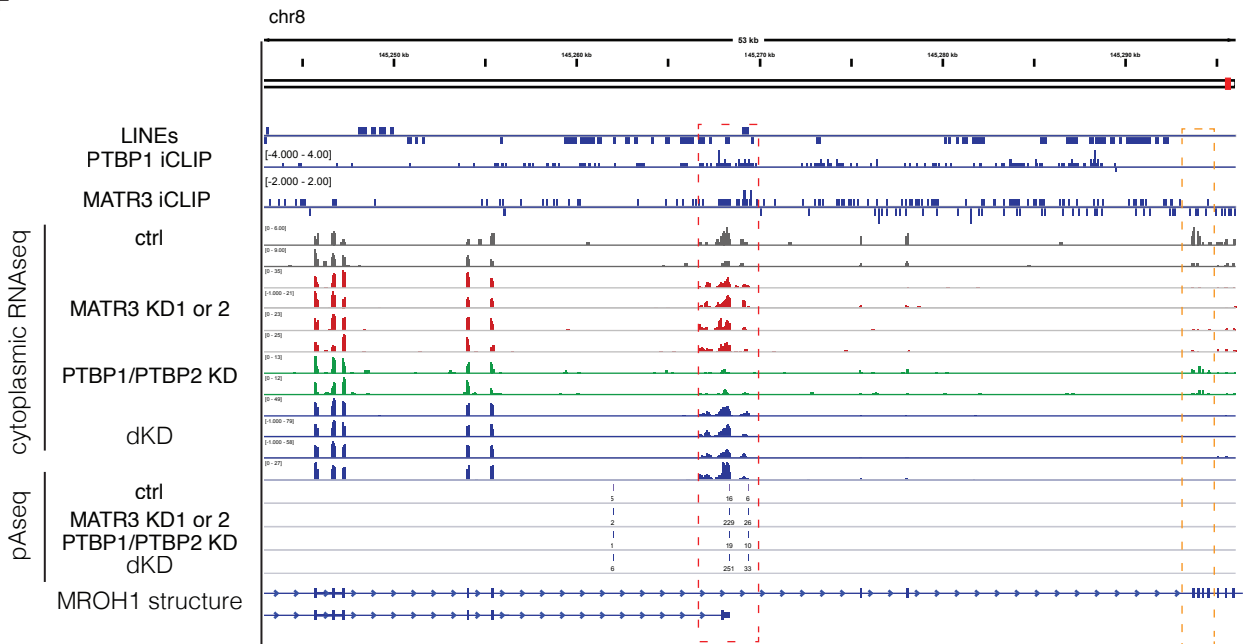

**G**

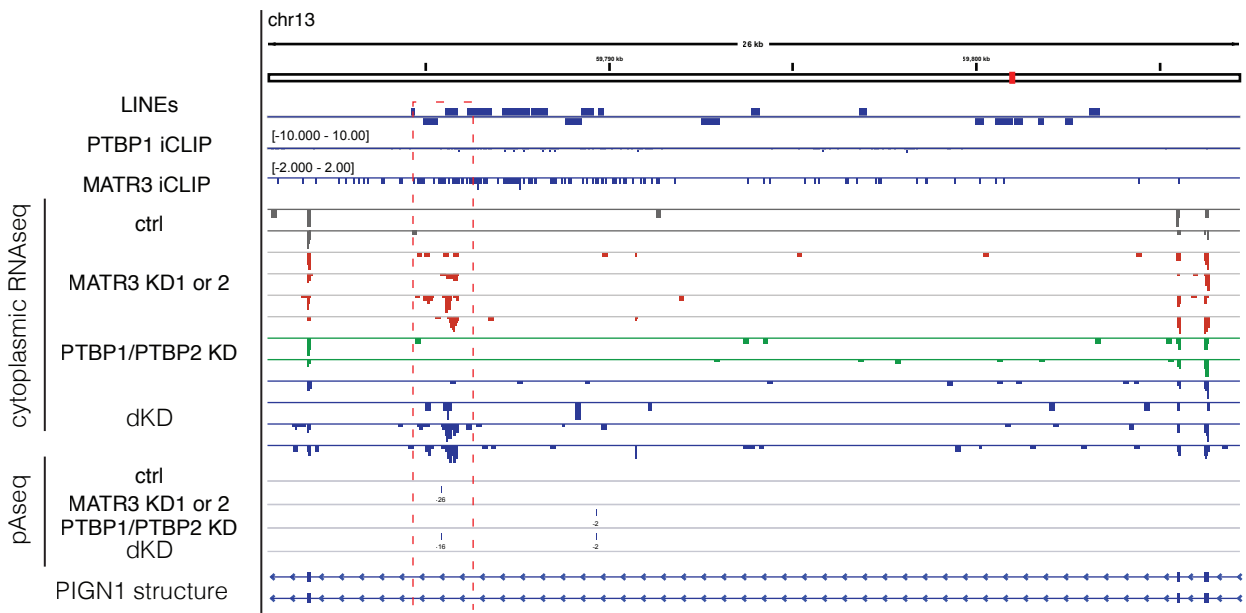

1666 **Figure S3. Related to Figure 3: MATR3/PTBP1 repressed exons are**  
1667 **frequently derived from LINEs or proximal to LINEs.**

1668 (A) The metaprofile shows the amount of sense L2 sequences flanking  
1669 the splice sites of MATR3/PTBP1/2 repressed events. L2 sequences  
1670 are particularly enriched towards the 3' splice site, and to a lesser  
1671 extent than antisense L1 sequence.

1672 (B) The metaprofile shows the amount of antisense L1 sequences  
1673 flanking the splice sites of MATR3/PTBP1/2 repressed events, after  
1674 removing all LINE-derived exons. The enrichment for L1 antisense  
1675 sequence still persists (compare with Fig. 3A).

1676 (C) Semi-quantitative Western blot showed efficient depletion of MATR3  
1677 and PTBP1 in cells transfected with siRNAs against MATR3 or  
1678 PTBP1 individually or in combination.

1679 (D) The overlap of LINE-derived exons for which the 3' or 5' splice site is  
1680 derived from a LINE element, only showing exons with  
1681 junction-spanning reads on both sides (498 exons).

1682 (E) Seventeen exons differentially included in MATR3 depleted cells were  
1683 selected, and changes in exon inclusion were validated by RT-PCR.  
1684 For each exon, the relative abundance of the isoform including the  
1685 alternative exon was calculated compared to the exon exclusion  
1686 isoform (conventional splicing pattern). The change between cells  
1687 depleted of MATR3, PTBP1/2, or both simultaneously is shown, and  
1688 exons are grouped by their positioning relative to the closest LINE  
1689 element. Semi-quantitative RT-PCR analysis is averaged across three  
1690 independent replicates.

1691 (F) And (G) Examples of MATR3/PTBP1 repressed polyA sites. Genome  
1692 browser tracks show position and orientation of LINE insertion  
1693 (hg19/RepeatMasker annotation), PTBP1 and MATR3 iCLIP  
1694 coverage, as well as tracks for RNAseq of cytoplasmic RNA and  
1695 mRNA 3' end sequencing (pA-seq) from total RNA. All tracks are  
1696 scaled appropriately to library size. (F) The MROH1 gene shows  
1697 inclusion of additional exonic sequence and two different terminal  
1698 exon isoforms in MATR3 depleted cells (highlighted by red dashed

1699 lines). Usage of this alternative terminal exon results in gene  
1700 truncation as seen by loss of expression downstream of it (highlighted  
1701 by orange dashed lines). (G) The PIGN1 shows usage of a cryptic  
1702 processing site resulting in a novel exon and a novel polyA site,  
1703 derived from two antisense L1 insertions (highlighted by red dashed  
1704 lines).

1705

1706

1707

**Figure S4 Related to Figure 4.**

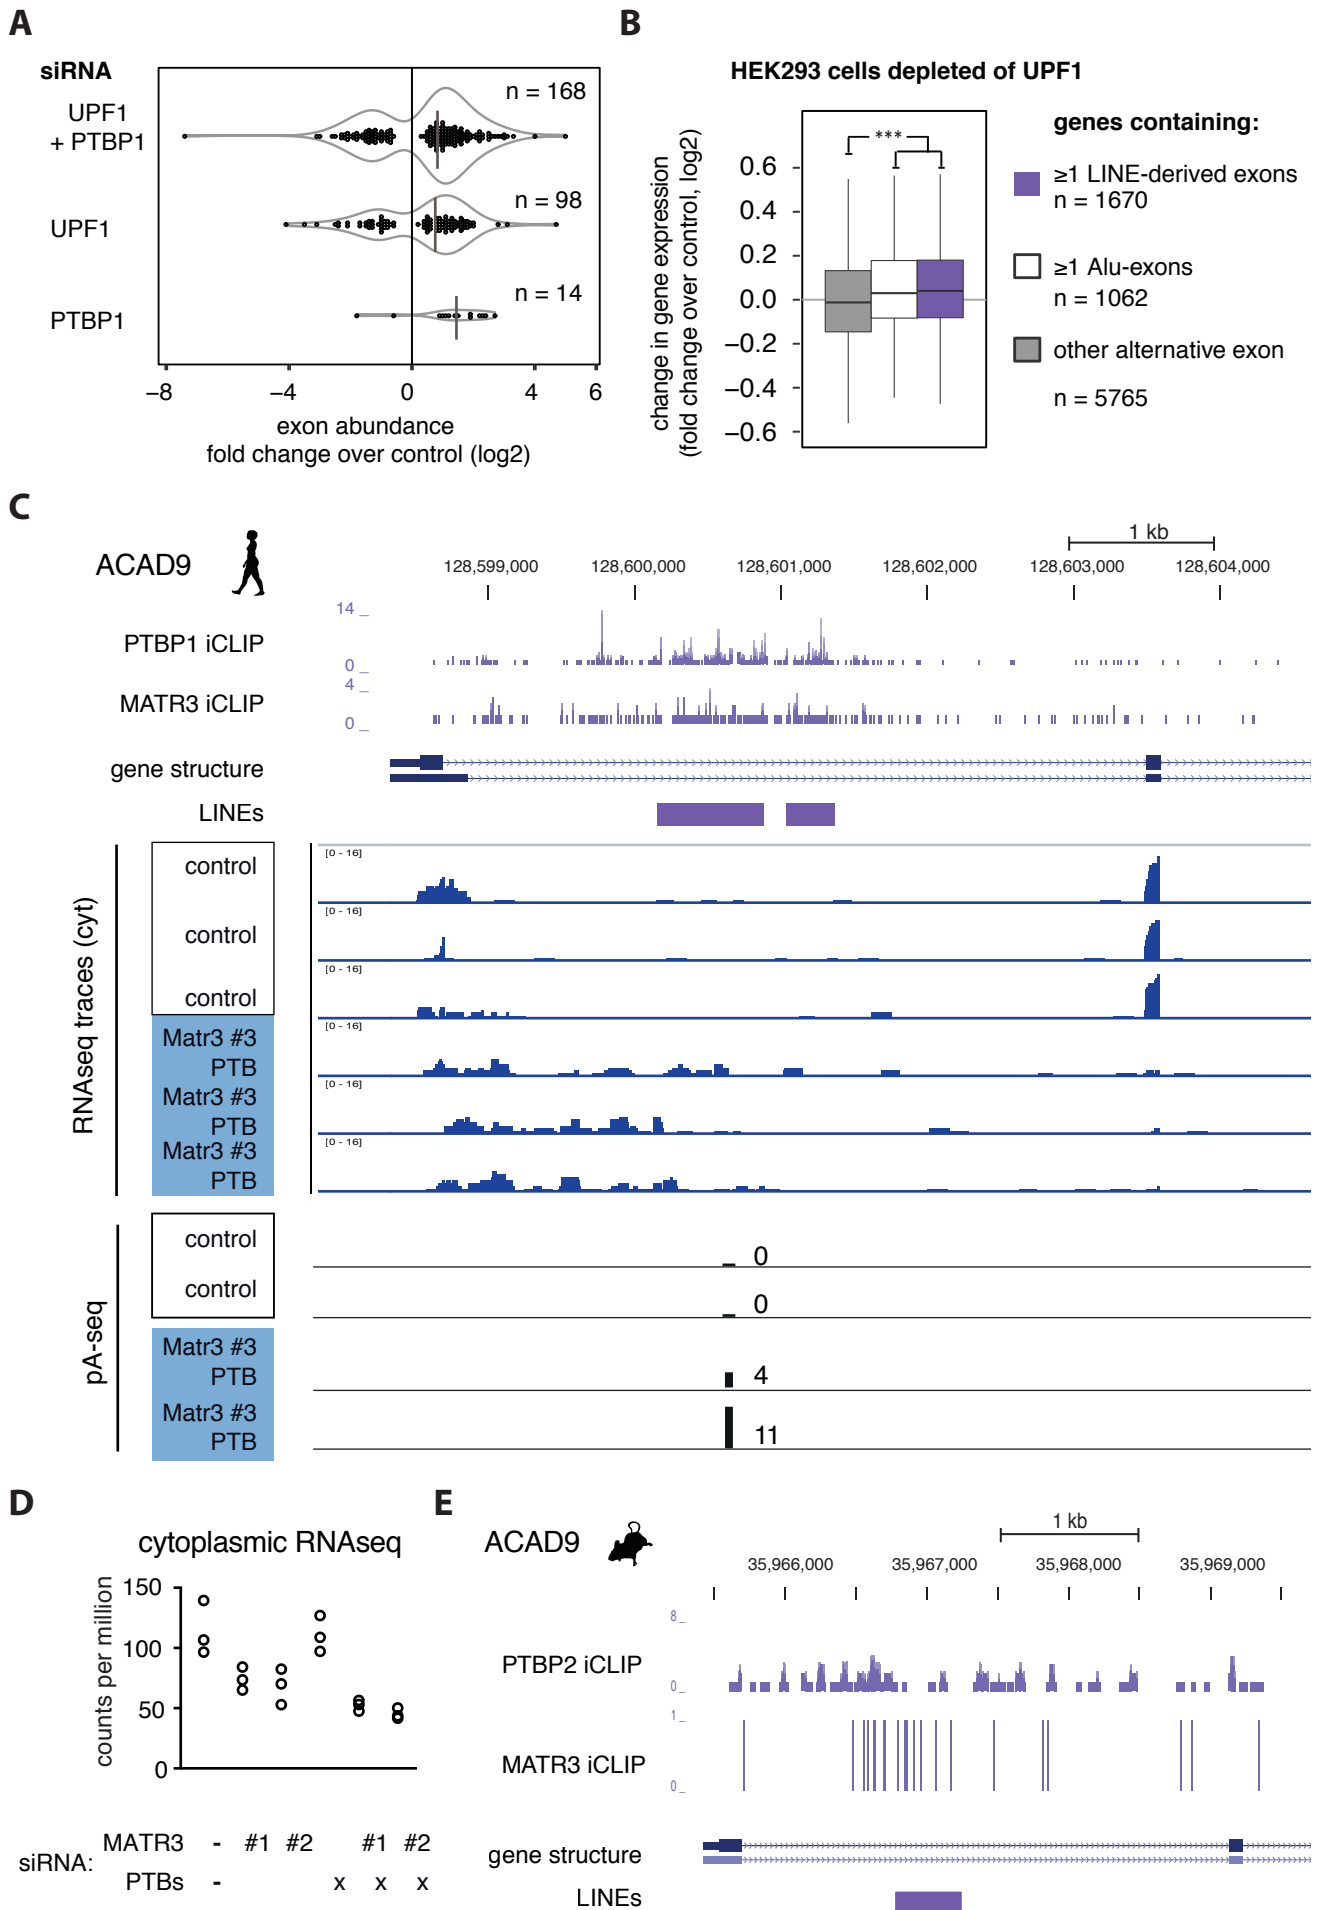



1708 **Figure S4. Related to Figure 4: Nonsense-mediated decay triggered by**  
1709 **LINE-derived exons and depletion of ACAD9 expression following**  
1710 **inclusion of a LINE-derived exons.**

1711 (A) RNAseq data from Ge et al. on HEK293 cells depleted of PTBP1,  
1712 UPF1 or both, was reanalysed with DEXSeq. The number of  
1713 detectable LINE-derived exons and their change in abundance  
1714 compared to control cells is shown. Consistent with the hypothesis  
1715 that LINE-derived exons are repressed in wild-type cells by splicing  
1716 repressors and through decay of the inclusion isoform, combined  
1717 depletion of UPF1 and PTBP1 greatly increases the number of  
1718 detectable LINE-derived exons.

1719 (B) The change in gene expression in UPF1-depleted cells over control is  
1720 shown for genes that contained or did not contain one or more  
1721 LINE-derived exons. As positive control, Alu-exon containing genes  
1722 are shown since inclusion of Alu-exons frequently triggers NMD (Attig  
1723 et al., 2016).

1724 (C) Genome browser tracks for PTBP1 and MATR3 iCLIP data from HeLa  
1725 cells at the ACAD9 locus. Position of L2 insertions is annotated below  
1726 the structure of annotated ACAD9 transcripts, and stranded RNAseq  
1727 data from cytoplasmic RNA of HeLa cells depleted of  
1728 MATR3/PTBP1/PTBP2 is shown. Below the position of a novel pA site  
1729 within the second L2 repeat is shown, which is only detected in  
1730 absence of MATR3/PTBP1/PTBP2.

1731 (D) Quantification of ACAD9 expression in single and combined depletion  
1732 of MATR3 and PTBP1/2 from cytoplasmic RNAseq.

1733 (E) Genome browser tracks for PTBP2 and MATR3 on the mouse ACAD9  
1734 locus. In mouse, there is a single, 465bp long L2 insertion.

1735

1736

1737

Figure S5 Related to Figure 5

A

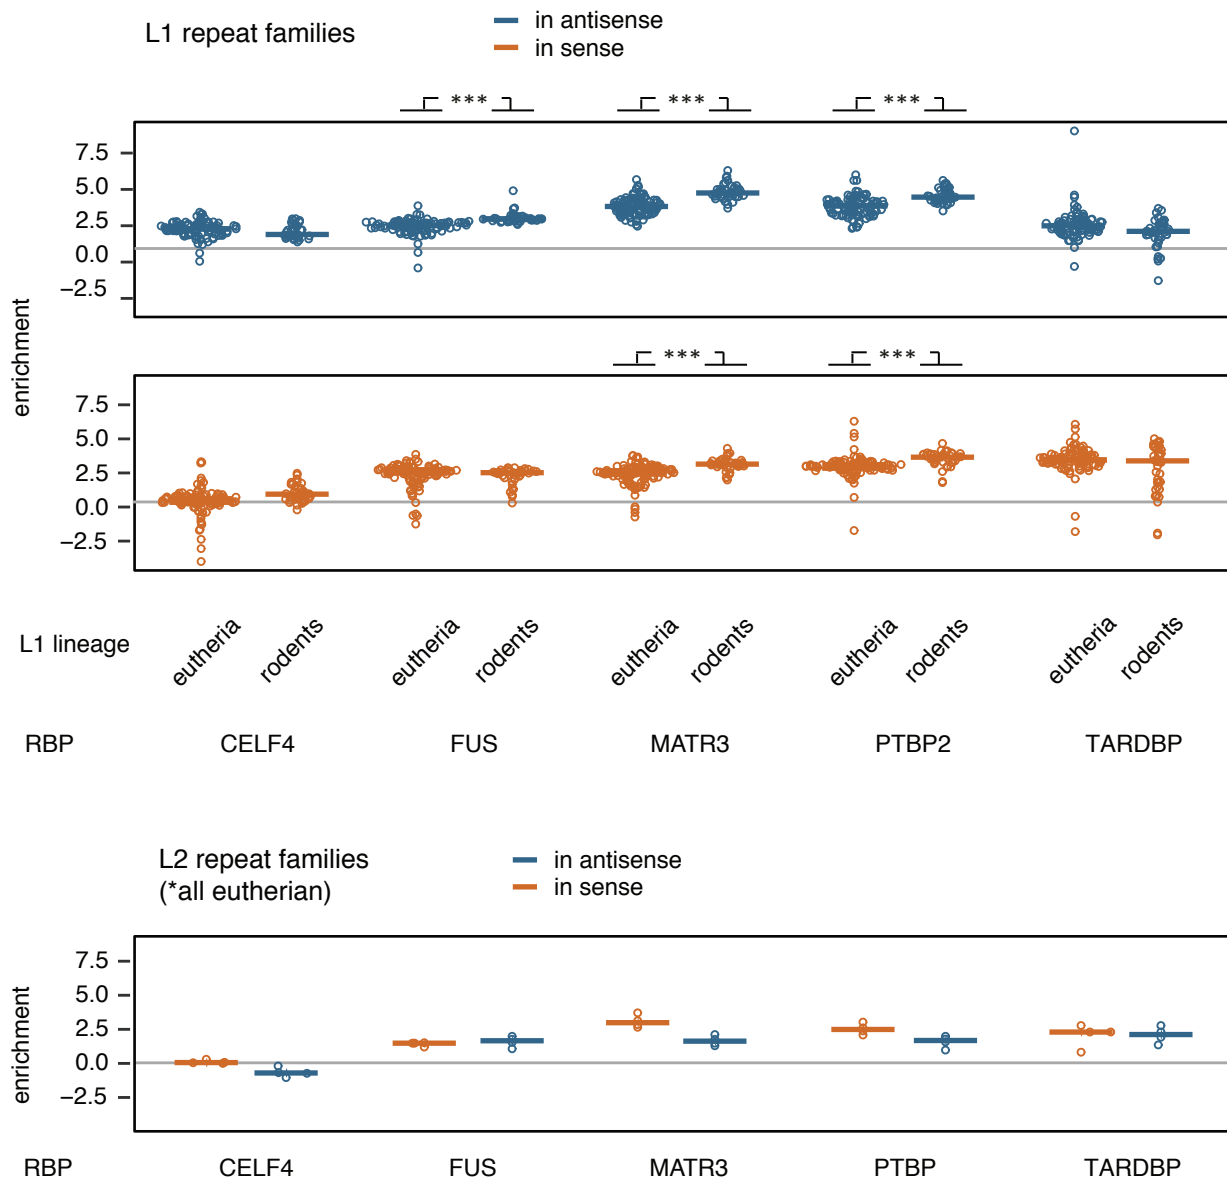

B

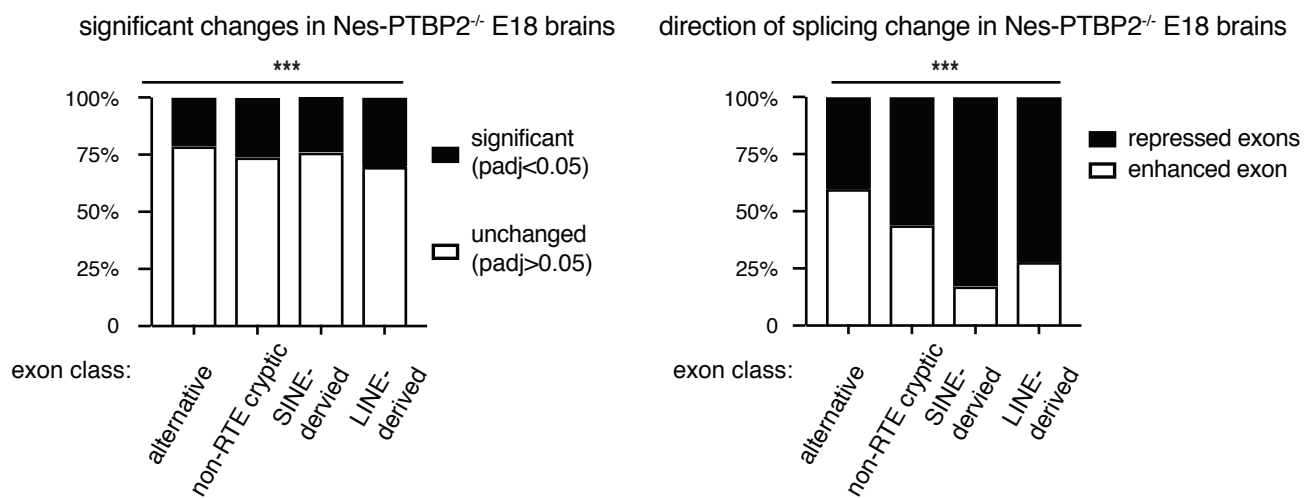

**C**

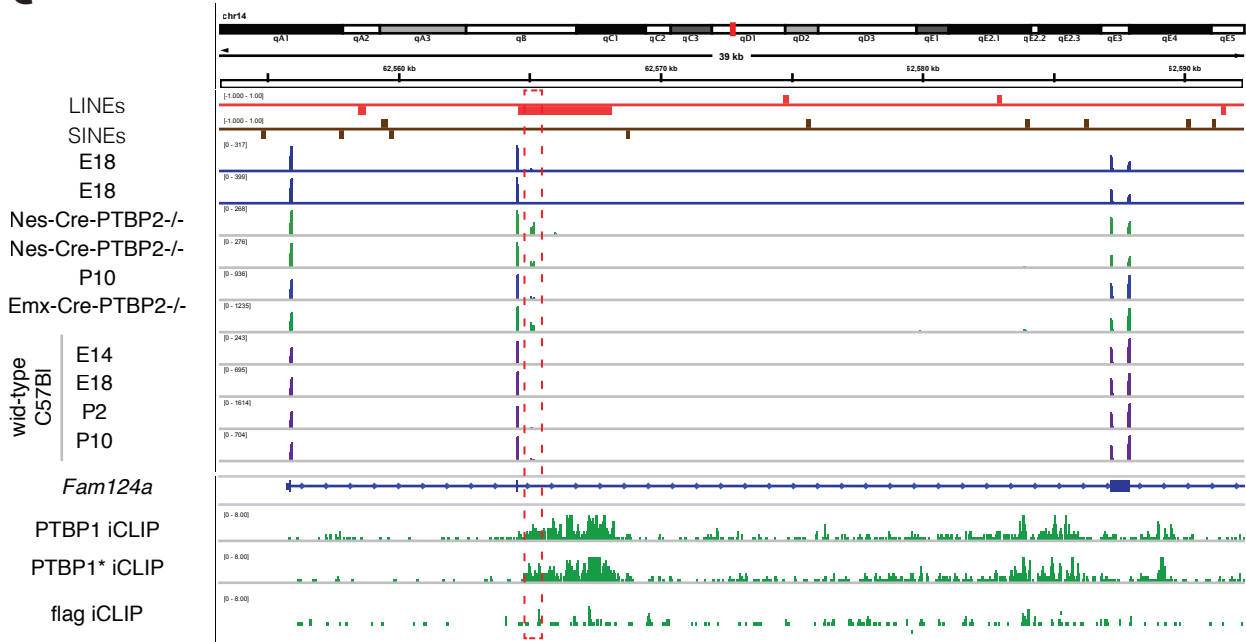

**D**

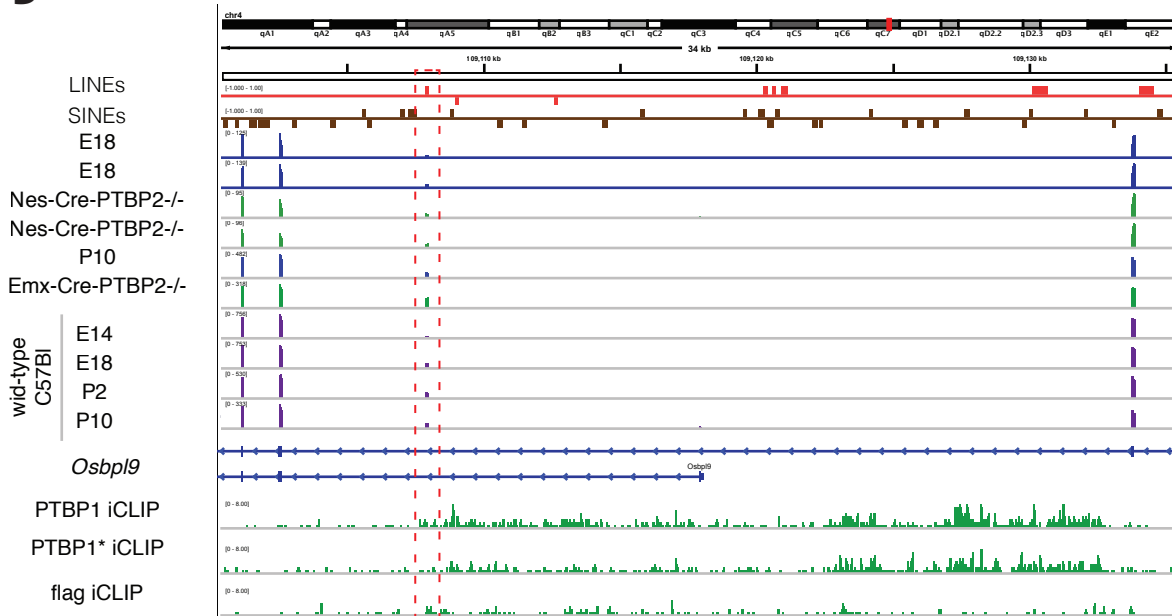

**E**

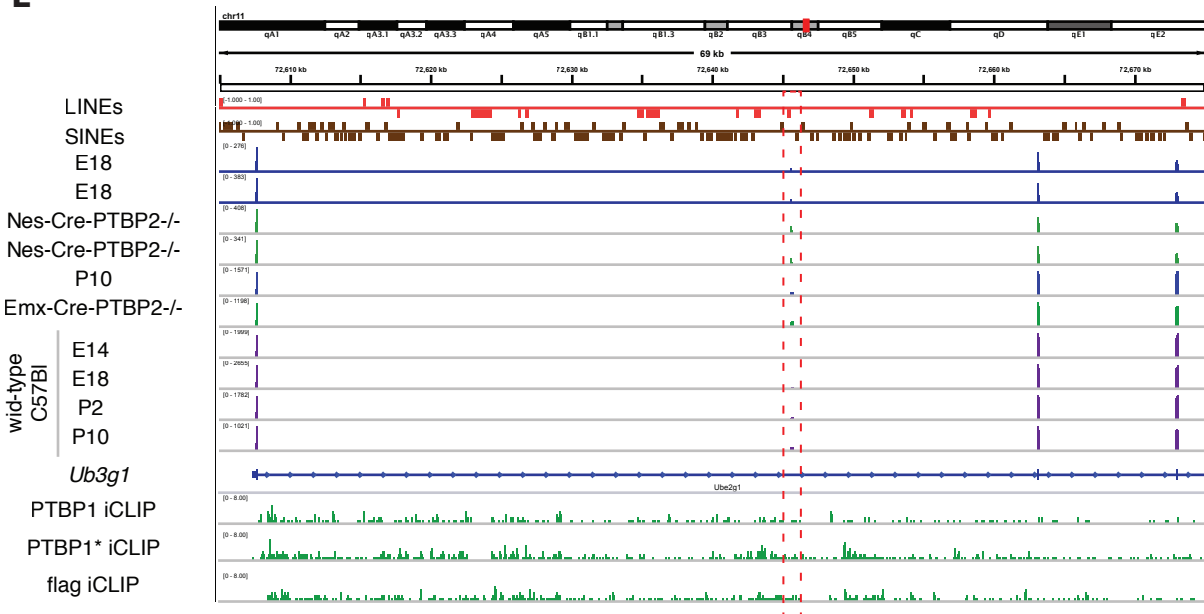

1740 **Figure S5. Related to Figure 5: MATR3 and PTBP2 binds to mouse-**  
1741 **specific L1 insertions and PTBP2 represses LINE-derived exon inclusion**  
1742 **in the mouse brain.**

1743 (A) Tetrascript (Jin et al., 2015) was used to estimate the enrichment of  
1744 each subfamily of L1 and L2 repeats among the bound RNA  
1745 sequences of a panel of RBPs, with CLIP data available for C57Bl  
1746 mouse brain; comparing the abundance in recovered eCLIP tags to  
1747 the abundance in RNAseq reads of P2. For each RBP, 133 repBase  
1748 LINE subfamilies were considered (129 for L1, 4 for L2, (Jurka,  
1749 1998)). Since eCLIP is strand-specific, binding to LINEs transcribed in  
1750 sense or in antisense were quantified separately, coloured in red and  
1751 blue. Details and references of data sets are given in Supplementary  
1752 Table 1.

1753 (B) RNAseq data of PTBP2<sup>-/-</sup> knockout mouse brains from (Vuong et al.,  
1754 2016) was re-analysed, and exons with significant differences in  
1755 inclusion in Nes-Cre-PTBP2<sup>-/-</sup> knockout mouse brains were stratified  
1756 according to their relationship to retrotransposon repeats.  
1757 LINE-derived exons were more likely to be mis-regulated than  
1758 expected by chance ( $\chi^2$  test), and PTBP2 acts primarily as repressor  
1759 on LINE-derived exons. Number of exons in each group are:  
1760 alternative exons n=8142, non-repeat derived cryptic exons n=33420,  
1761 SINE derived exons n=459, LINE-derived exons n=308.

1762 (C) to (E) RNAseq data of PTBP2<sup>-/-</sup> knockout mouse brains from (Vuong  
1763 et al., 2016) compared to RNAseq data of C57/B6 wild-type mouse  
1764 brain at different developmental stages (E10, E14, P2 and P10).  
1765 LINE-derived exons were selected from the exon list of PTBP2  
1766 responsive exons provided by Vuong et al. in Suppl Table 3 and 5;  
1767 that is they are selected to show a minimum 10% change in inclusion  
1768 upon PTBP2 depletion. PTBP1 iCLIP was done with flag antibody in  
1769 Rosa-PTBP1 transgenic mice, and PTBP1\* iCLIP is PTBP1 iCLIP in  
1770 PTBP2 knockouts (also from (Vuong et al., 2016)). Because of the  
1771 high extent of intron-retention reads in mouse brain, only junction-  
1772 spanning reads are shown. These exons are more included in

1773 postnatal brains than in foetal brain, suggesting PTBP2 suppresses  
1774 exonisation in developing neurons but less in mature neurons. (C)  
1775 Exon 3 of *Fam124* is derived from a rodent specific L1 insertion. (D)  
1776 Exon 5 of *Osbp19* is derived from an old CR1 insertion conserved  
1777 across mammalian lineages. (E) Exon 2 of *Ube2g1* is derived from an  
1778 old HAL1 insertion conserved across mammalian lineages.  
1779  
1780  
1781

**Figure S6. Related to Figure 5.**

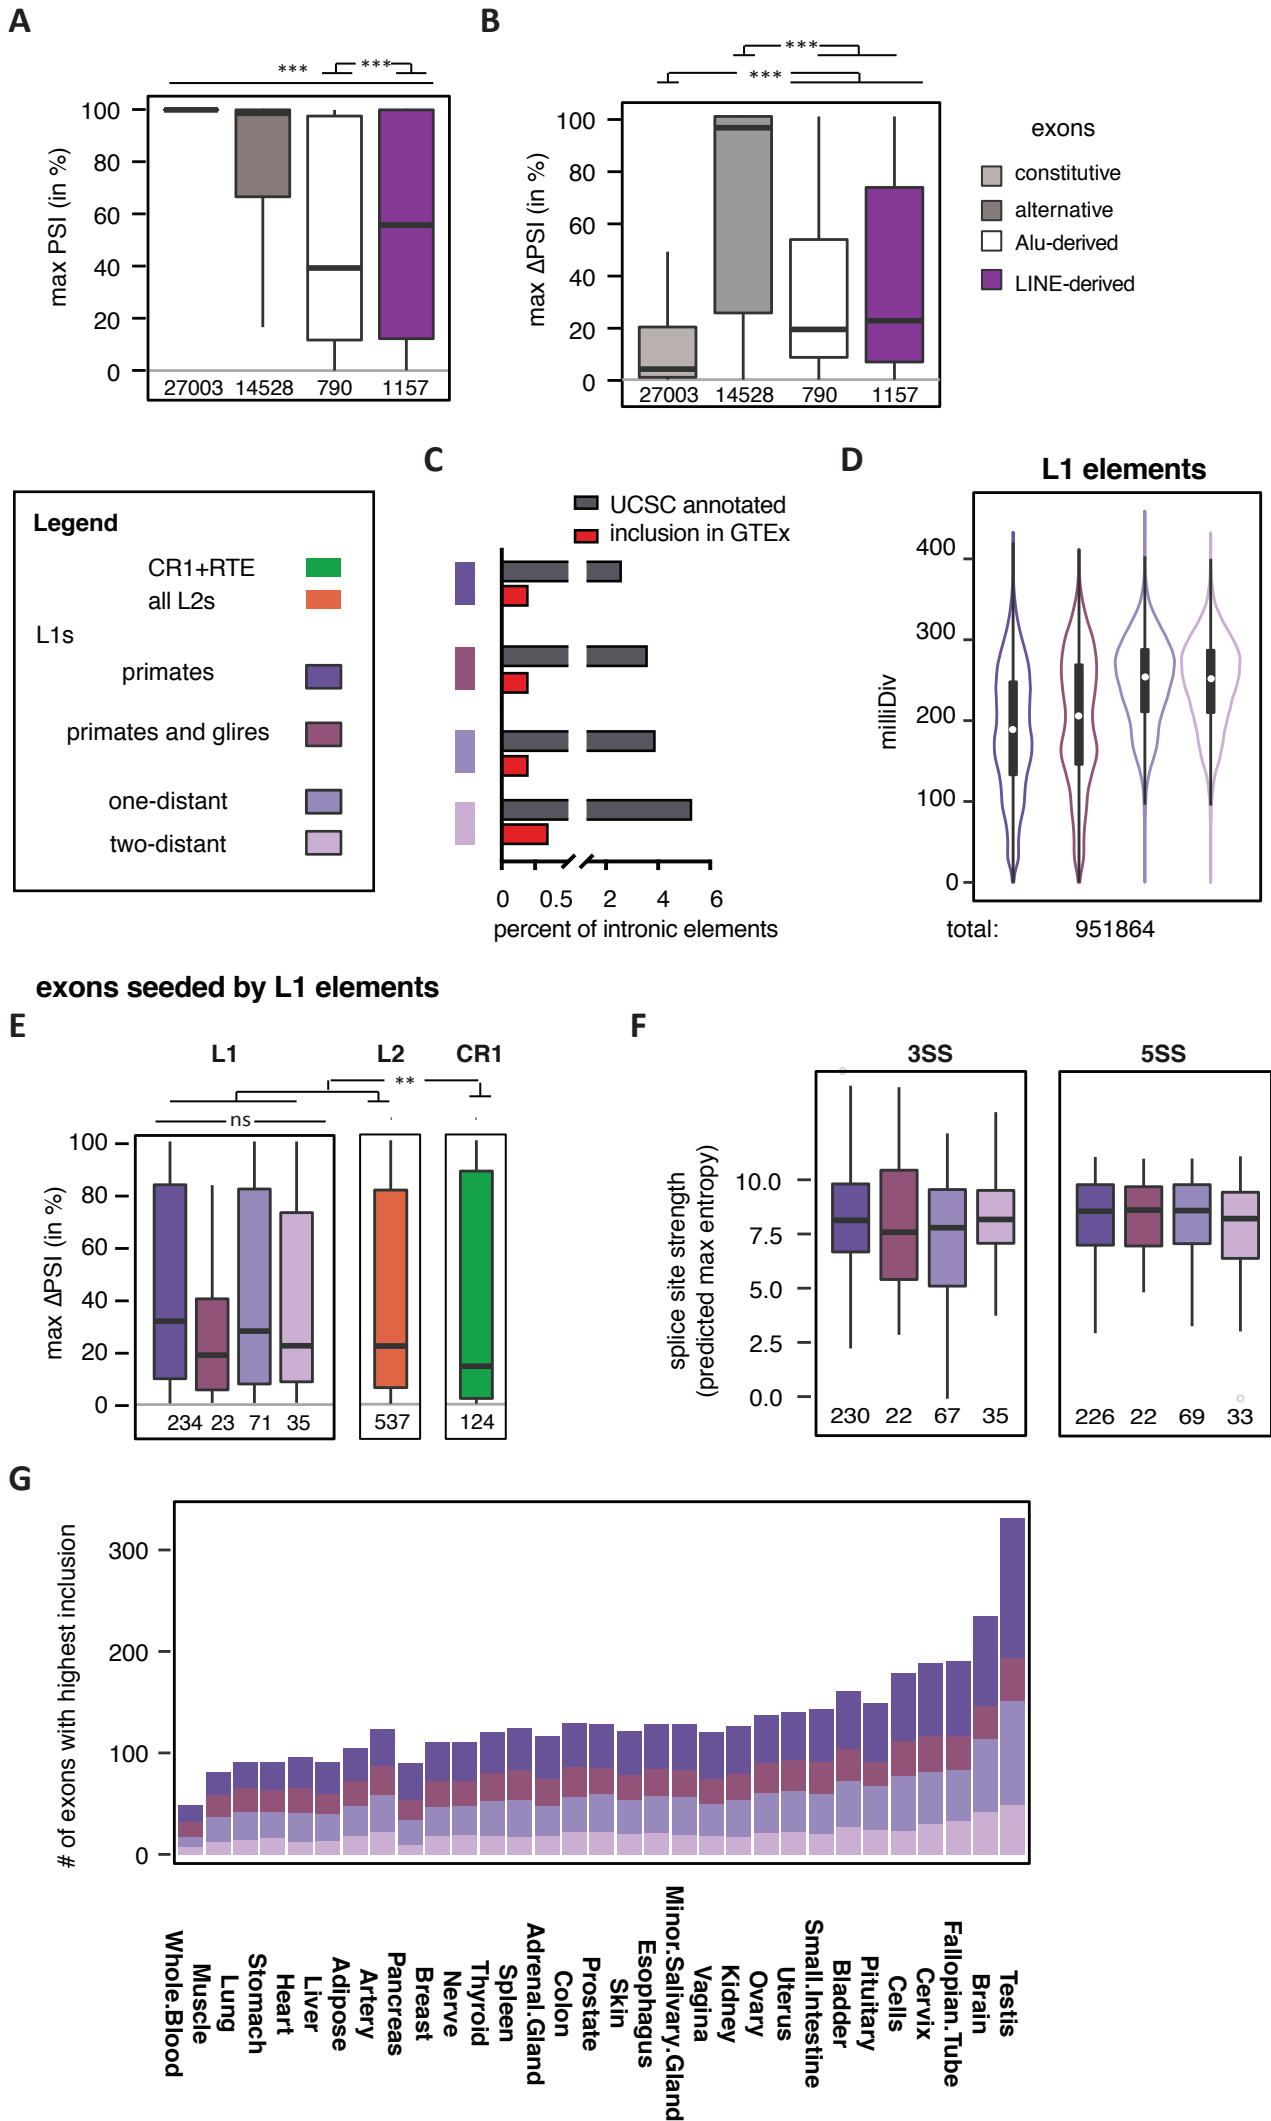

1782 **Figure S6. Related to Figure 5: L1-derived exons are a source of primate-**  
1783 **specific alternative exons with high tissue-specific variability.**

1784 Percent splice index (PSI) was calculated in the GTEx panel of human tissues  
1785 for LINE-derived and Alu-derived exons, as well as all other exons of the  
1786 same genes. All exons are annotated within UCSC and cross-referenced with  
1787 RefSeq annotation. Inclusion levels range from 0 to 100%, showing no  
1788 inclusion or full inclusion. If no support for expression of the flanking exons  
1789 was found, the gene is assumed to be non-expressed. Genomic age of L1  
1790 elements as defined in Figure 5A. Significance tests were done across groups  
1791 by Kruskal-Wallis' test and pairwise comparisons were done with Dunn's test  
1792 and corrected according to Holm-Šidák. \*\* and \*\*\* indicate adjusted p-value  
1793 was below 0.01 and 0.001, respectively.

1794 (A) Maximum inclusion in any tissue was calculated for each exon, and  
1795 the distribution is shown for LINE-derived exons, Alu-exons as well as  
1796 non-repeat derived alternative and constitutive exons.

1797 (B) For all exons surveyed within the GTEx data, the difference in PSI  
1798 between the tissues with highest and lowest inclusion was calculated  
1799 as metric for tissue-specific inclusion.

1800 (C) Exons derived from old L1 insertions are most likely to form an exon  
1801 based on UCSC annotation. Based on GTEx data, exons derived from  
1802 old L1 insertions retained in primates, cow and dog, are most likely to  
1803 be included in any of the tissue types covered.

1804 (D) The substitutions from L1 consensus families is shown for L1s  
1805 grouped by genomic age. As expected, young elements show fewer  
1806 substitutions from consensus than old elements.

1807 (E) Difference in PSI between tissues with highest and lowest inclusion  
1808 for exons derived from L1 elements grouped by genomic age of the  
1809 insertion, compared to exons derived from L2 and CR1 insertions.

1810 (F) Exons derived from L1 elements have strong splice sites irrespective  
1811 of the genomic age of the insertion. The maximum entropy score of 5'  
1812 and 3' splice sites of each exon was predicted based on nucleotide  
1813 sequence (Yeo and Burge, 2004).

1814 (G) The number of L1-derived exons is shown for all primary tissues

1815 screened in the GTEx data, based on testing in which tissue an exon  
1816 is most included. Exons are allowed to be counted multiple times if  
1817 maximum inclusion was in multiple tissues, for instance because they  
1818 are constitutive.

1819

1820



### Suppl Table 3

#### Cufflinks predicted exonic bins\*

\*Cufflinks prediction was flattened from gtf to gff for HTseqcounts.py

exonic bins of min 5nt length and sufficient coverage for DEXSeq analysis

referenced to UCSC

|                                                            | total   | truly novel exons | LINE-derived | novel LINE-derived |
|------------------------------------------------------------|---------|-------------------|--------------|--------------------|
| exonic bins                                                | 264,169 | 26,939            | 1,430        | 634                |
| with min 1 splice site confirmed by junction-spanning read | 177,179 | 9,000             | 1,430        | 634                |
| # of genes                                                 | 12,929  | 4,455             | 1,065        | 499                |
| exonic bins in protein coding genes                        | 165,138 | 7,020             | 1,114        | 501                |
| # of genes                                                 | 11,582  | 3,689             | 899          | 86                 |

referenced to ENSEMBL72

|                                                            | total   | truly novel exons | LINE-derived | novel LINE-derived |
|------------------------------------------------------------|---------|-------------------|--------------|--------------------|
| exonic bins                                                | 264,169 | 6,627             | 1,430        | 257                |
| with min 1 splice site confirmed by junction-spanning read | 177,179 | 2,246             | 1,430        | 257                |
| # of genes                                                 | 12,929  | 1,305             | 1,065        | 188                |
| exonic bins in protein coding genes                        | 165,138 | 1,862             | 1,114        | 207                |
| # of genes                                                 | 11,582  | 1,233             | 899          | 178                |

LINE-derived exons

| total: 1,430 | ENSEMBL         | UCSC | "cryptic exons" |             |                 |             |
|--------------|-----------------|------|-----------------|-------------|-----------------|-------------|
|              |                 |      | constitutive    | alternative | partial-overlap | truly novel |
|              | perfect overlap |      | 266             | 318         | 375             | 40          |
|              | partial-overlap |      | 0               | 3           | 972             | 130         |
|              | truly novel     |      | 0               | 0           | 16              | 34          |

## Suppl Table 4

### changes in pA-site usage

| condition          | proximal pA site usage | FDR     | #   | # within LINE repeats proximal | # within LINE repeats distal |
|--------------------|------------------------|---------|-----|--------------------------------|------------------------------|
| Matr3 KD1          | up                     | < 0.05  | 257 | 9                              | 6                            |
|                    |                        | >= 0.05 | 417 | 24                             | 24                           |
|                    | down                   | < 0.05  | 329 | 26                             | 5                            |
|                    |                        | >= 0.05 | 428 | 54                             | 22                           |
| neither            | -                      | 2,605   | 150 | 63                             |                              |
| Matr3 KD2          | up                     | < 0.05  | 214 | 11                             | 7                            |
|                    |                        | >= 0.05 | 416 | 41                             | 27                           |
|                    | down                   | < 0.05  | 368 | 14                             | 5                            |
|                    |                        | >= 0.05 | 567 | 46                             | 26                           |
| neither            | -                      | 2,256   | 131 | 56                             |                              |
| PTB KD             | up                     | < 0.05  | 219 | 5                              | 4                            |
|                    |                        | >= 0.05 | 420 | 28                             | 21                           |
|                    | down                   | < 0.05  | 401 | 18                             | 4                            |
|                    |                        | >= 0.05 | 516 | 52                             | 28                           |
| neither            | -                      | 2,332   | 139 | 65                             |                              |
| Matr3 KD1 + PTB KD | up                     | < 0.05  | 370 | 17                             | 11                           |
|                    |                        | >= 0.05 | 424 | 34                             | 21                           |
|                    | down                   | < 0.05  | 399 | 24                             | 5                            |
|                    |                        | >= 0.05 | 492 | 44                             | 28                           |
| neither            | -                      | 2,373   | 129 | 59                             |                              |
